# Supplementary material for: Enantioselective total synthesis of (+)-rubrobramide, (+)-talaramide A, and (−)-berkeleyamide D by a skeletal diversification strategy
Source: Royal Society of Chemistry journal article supplement (doi:10.1039/d1cc04290d), 2021-01-01
Supplement: d1cc04290d1.pdf [file d1cc04290d1.pdf]

## Supporting Information

### **Enantioselective Total Synthesis of (+)-Rubrobramide, (+)-Talaramide A, and (-)-Berkeleyamide D by a Skeletal Diversification Strategy**

Kosaku Tanaka, III,<sup>†</sup> Kenichi Kobayashi,<sup>\*†‡</sup> and Hiroshi Kogen<sup>\*†</sup>

<sup>†</sup>Graduate School of Pharmaceutical Sciences, Meiji Pharmaceutical University, 2-522-1 Noshio, Kiyose, Tokyo 204-8588, Japan

<sup>‡</sup>Graduate School of Pharmaceutical Sciences, Health Sciences University of Hokkaido, 1757, Kanazawa, Tobetsu, Ishikari, Hokkaido 061-0293, Japan

## **Table of Contents**

|                                                                       |     |
|-----------------------------------------------------------------------|-----|
| Materials and Methods .....                                           | S1  |
| Experimental Procedures and Characterization Data .....               | S2  |
| NMR chemical shifts of natural products and synthetic compounds ..... | S13 |
| B3LYP 6-311G+ (d, p) Calculated Cartesian Coordinates .....           | S16 |
| Experimental Spectra .....                                            | S22 |

**Materials and Methods:** <sup>1</sup>H NMR spectra were measured at 300 MHz (JNM-AL300, JEOL) or 400 MHz (JNM-AL400, ECZ400S, JEOL). Chemical shifts are expressed in ppm relative to tetramethylsilane ( $\delta = 0$ ) as an internal standard (CDCl<sub>3</sub> or DMSO-*d*<sub>6</sub>). Splitting patterns are indicated as follows: s, singlet; d, doublet; t, triplet; q, quartet; sept, septet; m, multiplet; br, broad peak. <sup>13</sup>C NMR spectra were measured at 100 MHz (JNM-AL400, JEOL). The chemical shifts are reported in ppm, relative to the central line of the triplet at 77.0 ppm for CDCl<sub>3</sub> or the septet at 39.6 ppm for DMSO-*d*<sub>6</sub>. Infrared spectra (IR) were measured on an IR spectrometer (VALOR-III, JASCO) and are reported in wavenumbers (cm<sup>-1</sup>). High-resolution mass spectra (HRMS) were obtained using a mass spectrometer (JMS 700, JEOL) with a direct inlet system. Optical rotations were measured on a polarimeter (P-2200, JASCO) using a 100 mm pathlength cell. Melting points (m.p.) were measured on a Micro Melting Point system (Yanaco). Column chromatography was carried out on silica gel (40–100 mesh). Analytical thin-layer chromatography (TLC) was performed using 0.25 mm silica gel 60-F plates.

## Experimental Procedures and Characterization Data

### Methyl (*R*)-2-((2-methoxyethoxy)methoxy)-4-methylpentanoate (**S2**)

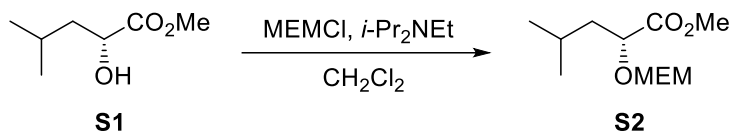

MEMCl (14.6 mL, 123 mmol) was slowly added to a stirred solution of secondary alcohol **S1** (7.02 g, 48.0 mmol) and *i*-Pr<sub>2</sub>NEt (50 mL, 287 mmol) in CH<sub>2</sub>Cl<sub>2</sub> (400 mL) over 5 min at 0 °C. The reaction mixture was heated to 40 °C (oil bath). After stirring for 48 h, the reaction was cooled to room temperature and quenched by addition of 1 N HCl. The organic layers were washed with saturated aqueous NaHCO<sub>3</sub> solution and dried over Na<sub>2</sub>SO<sub>4</sub>, filtered, and concentrated *in vacuo*. The crude residue was purified by flash chromatography on silica gel (5:1 hexane/EtOAc) to afford MEM-protected ester **S2** (7.40 g, 66% yield) as a colorless liquid.

$[\alpha]_D^{26} +87.3$  (*c* 1.05, CHCl<sub>3</sub>); IR (CHCl<sub>3</sub>) 2955, 2873, 1753, 1176, 1114, 1028 cm<sup>-1</sup>; <sup>1</sup>H NMR (400 MHz, CDCl<sub>3</sub>) δ 4.76 (d, *J* = 1.0 Hz, 2H), 4.19 (dd, *J* = 8.8, 4.4 Hz, 1H), 3.74-3.71 (m, 2H), 3.54-3.51 (m, 2H), 3.38 (s, 3H), 1.84-1.74 (m, 1H), 1.70 (ddd, *J* = 14.2, 8.8, 5.4 Hz, 1H), 1.51 (ddd, *J* = 13.6, 8.8, 4.4 Hz, 1H), 0.93 (d, *J* = 6.8 Hz, 3H), 0.93 (d, *J* = 6.8 Hz, 3H); <sup>13</sup>C NMR (100 MHz, CDCl<sub>3</sub>) δ 173.6, 95.3, 74.4, 71.6, 67.6, 59.0, 51.8, 41.8, 24.4, 23.1, 21.6; HRMS (FAB-DFMS) *m/z*: [M+H]<sup>+</sup> Calcd for C<sub>11</sub>H<sub>23</sub>O<sub>5</sub> 235.1545; Found 235.1538.

### Di-*tert*-butyl (S)-3-((*R*)-1-((2-methoxyethoxy)methoxy)-3-methylbutyl)oxirane-2,2-dicarboxylate (**13**)

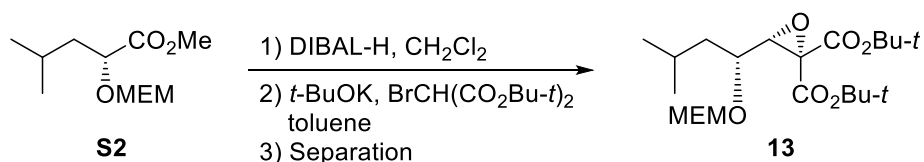

DIBAL-H (1.02 M solution in 31 mL hexane, 31 mmol) was slowly added to a stirred solution of ester **S2** (4.80 g, 20.5 mmol) in CH<sub>2</sub>Cl<sub>2</sub> (200 mL) at -78 °C via dropping funnel over 20 min. After stirring for 1 h, the reaction was quenched by addition of MeOH and saturated aqueous Rochelle salt, and vigorously stirred for 1 h. The mixture was extracted with EtOAc three times. The combined organic layers were washed with water

and brine, dried over Na<sub>2</sub>SO<sub>4</sub>, filtered, and concentrated *in vacuo*. The crude product was used in the next reaction without further purification.

A suspension of *t*-BuOK (2.40 g, 21.1 mmol) in toluene (50 mL) was added dropwise to di-*tert*-butyl bromomalonate (6.70 g, 22.7 mmol) in toluene (110 mL) at -78 °C. After stirring for 30 min, the crude aldehyde in toluene (50 mL) was added dropwise. After complete addition, the reaction mixture was allowed to warm to -45 °C gradually and was stirred for 12 h. The reaction was quenched by adding saturated aqueous NH<sub>4</sub>Cl, and the mixture was extracted three times with EtOAc. The combined organic layers were washed with water and brine, dried over MgSO<sub>4</sub>, filtered, and concentrated *in vacuo*. The crude residue was purified by flash chromatography on silica gel (5:1 hexane/EtOAc) to afford epoxide **13** (5.23 g, 61% yield) as a colorless oil.

[ $\alpha$ ]<sub>D</sub><sup>22</sup> +33.6 (*c* 1.23, CHCl<sub>3</sub>); IR (CHCl<sub>3</sub>) 2983, 2960, 1740, 1371, 1255, 1165, 1124, 1046, 1028 cm<sup>-1</sup>; <sup>1</sup>H NMR (400 MHz, CDCl<sub>3</sub>)  $\delta$  4.96 (d, *J* = 6.8 Hz, 1H), 4.75 (d, *J* = 6.8 Hz, 1H), 3.79-3.74 (m, 1H), 3.71-3.65 (m, 1H), 3.55-3.53 (m, 2H), 3.45 (dt, *J* = 8.6, 2.4 Hz, 1H), 3.41 (d, *J* = 8.6 Hz, 1H), 3.37 (s, 3H), 1.89-1.79 (m, 1H), 1.62 (ddd, *J* = 14.0, 10.0, 4.0 Hz, 1H), 1.50 (s, 9H), 1.48 (s, 9H), 1.26 (m, 1H), 0.93 (d, *J* = 6.3 Hz, 3H), 0.86 (d, *J* = 6.3 Hz, 3H); <sup>13</sup>C NMR (100 MHz, CDCl<sub>3</sub>)  $\delta$  164.7, 163.5, 94.8, 83.7, 83.5, 73.0, 71.7, 67.4, 64.3, 59.8, 59.0, 40.5, 27.9 (3C), 27.8 (3C), 23.8, 23.6, 21.2; HRMS (FAB-DFMS) *m/z*: [M+H]<sup>+</sup> Calcd for C<sub>21</sub>H<sub>39</sub>O<sub>8</sub> 419.2645; Found 419.2638.

(1*R*,4*R*,5*S*)-4-Isobutyl-*N*-methoxy-*N*-methyl-2-oxo-3,6-dioxabicyclo[3.1.0]hexane-1-carboxamide (**14**)

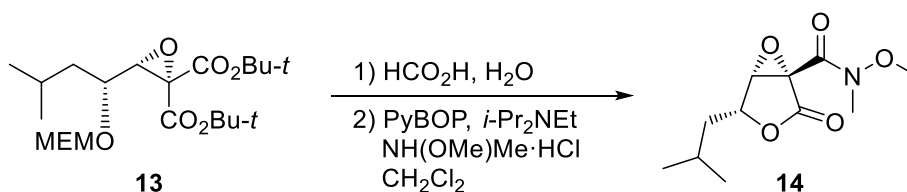

Epoxide **13** (2.00 g, 4.78 mmol) was dissolved in HCO<sub>2</sub>H (30 mL) and H<sub>2</sub>O (10 mL), and the solution was stirred at 35 °C for 12 h. The reaction mixture was concentrated *in vacuo*. The crude product was used in the next reaction without further purification.

*N*,*O*-dimethylhydroxylamine hydrochloride (1.40 g, 14.4 mmol), *i*-Pr<sub>2</sub>NEt (5.0 mL, 34.4 mmol), and PyBOP (5.0 g, 9.60 mmol) were added successively to a stirred solution of the crude mono carboxylic acid **12** in CH<sub>2</sub>Cl<sub>2</sub> (100 mL) at 0 °C. After stirring at room temperature for 2 h, the reaction was quenched by addition of 1 N HCl. The mixture was extracted with CH<sub>2</sub>Cl<sub>2</sub> three times and washed with saturated aqueous NaHCO<sub>3</sub>. The

combined organic layers were dried over MgSO<sub>4</sub>, filtered, and concentrated *in vacuo*. The crude residue was purified by flash chromatography on silica gel (1:1 hexane/EtOAc) to afford Weinreb amide **14** (1.00 g, 87% yield over two steps) as a colorless solid.

m.p. 67.5-69.5 °C; [ $\alpha$ ]<sub>D</sub><sup>24</sup> +61.4 (*c* 0.61, CHCl<sub>3</sub>); IR (CHCl<sub>3</sub>) 3019, 2963, 1787, 1687, 1682, 1468, 1223, 1216, 1072, 938 cm<sup>-1</sup>; <sup>1</sup>H NMR (400 MHz, CDCl<sub>3</sub>)  $\delta$  4.61 (dd, *J* = 6.8, 5.9 Hz, 1H), 4.21 (s, 1H), 3.74 (s, 3H), 3.28 (s, 3H), 1.89-1.75 (m, 2H), 1.63-1.56 (m, 1H), 0.97 (d, *J* = 6.8 Hz, 3H), 0.99 (d, *J* = 6.8 Hz, 3H); <sup>13</sup>C NMR (100 MHz, CDCl<sub>3</sub>)  $\delta$  167.2, 161.5, 77.2, 62.0, 61.3, 58.9, 38.2, 32.2, 24.8, 22.9, 22.1; HRMS (FAB-DFMS) *m/z*: [M+H]<sup>+</sup> Calcd for C<sub>11</sub>H<sub>18</sub>NO<sub>5</sub> 244.1185; Found 244.1184.

(1*S*,4*R*,5*R*)-4-Isobutyl-*N*,4-dimethoxy-*N*-methyl-2-oxo-6-oxa-3-azabicyclo[3.1.0]hexane-1-carboxamide (**11**)

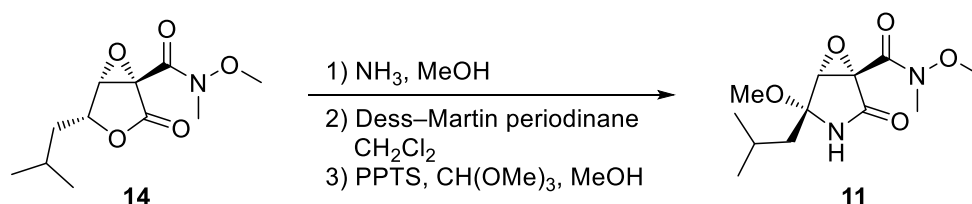

NH<sub>3</sub> (21 mmol, 7 M solution in 3 mL MeOH) was added to a stirred solution of Weinreb amide **14** (770 mg, 3.16 mmol) in MeOH (20 mL) at 0 °C. After stirring at 0 °C for 30 min, additional NH<sub>3</sub> (14 mmol, 7 M solution in 2 mL MeOH) was added. After 30 min, the reaction was concentrated *in vacuo*. The crude product was used in the next reaction without further purification.

Dess–Martin periodinane (1.95 g, 4.60 mmol) was added to a solution of the crude product in CH<sub>2</sub>Cl<sub>2</sub> (30 mL) and the mixture was stirred at room temperature for 1 h. The reaction was quenched by addition of saturated aqueous NaHCO<sub>3</sub> and Na<sub>2</sub>S<sub>2</sub>O<sub>3</sub> solution and stirred vigorously for 10 min. The mixture was extracted with CHCl<sub>3</sub> three times. The combined organic layers were dried over Na<sub>2</sub>SO<sub>4</sub>, filtered, and concentrated *in vacuo*. The crude product was used in the next reaction without further purification.

CH(OMe)<sub>3</sub> (3 mL) and PPTS (800 mg, 3.18 mmol) were added to a stirred solution of the crude product in MeOH (40 mL). The reaction was heated to reflux (oil bath) and stirred for 48 h. After cooling to room temperature, the reaction was quenched by addition of Et<sub>3</sub>N (4.4 mL) and concentrated *in vacuo*. The crude residue was purified by flash chromatography on silica gel (3:1 to 1:1 hexane/EtOAc) to afford lactam **11** (620 mg, 72% yield in three steps) as a colorless oil.

[ $\alpha$ ]<sub>D</sub><sup>25</sup> -45.6 (*c* 8.2, CHCl<sub>3</sub>); IR (neat) 3503, 3272, 2957, 1725, 1673, 1464, 1062, 763 cm<sup>-1</sup>;

$^1\text{H}$  NMR (500 MHz,  $\text{CDCl}_3$ )  $\delta$  7.03 (br s, 1H), 3.99 (d,  $J = 2.6$  Hz, 1H), 3.70 (s, 3H), 3.27 (s, 3H), 3.23 (s, 3H), 1.87 (sept,  $J = 6.5$  Hz, 1H), 1.73 (dd,  $J = 14.5, 5.1$  Hz, 1H), 1.58 (dd,  $J = 14.5, 7.9$  Hz, 1H), 0.97 (d,  $J = 6.5$  Hz, 3H), 0.94 (d,  $J = 6.5$  Hz, 3H);  $^{13}\text{C}$  NMR (125 MHz,  $\text{CDCl}_3$ )  $\delta$  169.3, 162.4, 89.6, 61.9, 61.4, 60.3, 49.8, 41.5, 32.2, 24.1, 23.9, 23.4; HRMS (FAB-DFMS)  $m/z$ :  $[\text{M}+\text{H}]^+$  Calcd for  $\text{C}_{12}\text{H}_{21}\text{N}_2\text{O}_5$  273.1450; Found 273.1446.

(1*R*,4*R*,5*R*)-1-(But-2-ynoyl)-4-isobutyl-4-methoxy-6-oxa-3-azabicyclo[3.1.0]hexan-2-one (**9**)

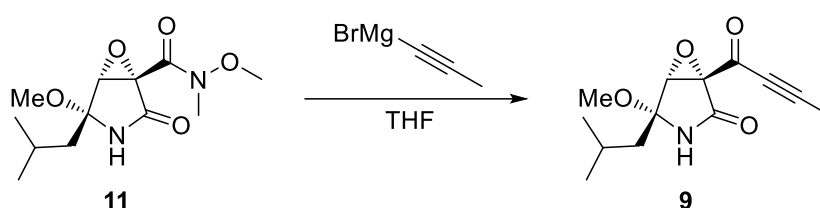

1-Propynyl magnesium bromide (4.5 mmol, 0.5 M in 9 mL THF) was added to a stirred solution of lactam **11** (200 mg, 0.734 mmol) in THF (7 mL) at  $-55$  °C. The reaction was heated to  $-40$  °C, stirred for 1 h, and quenched by addition of saturated aqueous  $\text{NH}_4\text{Cl}$  solution. The reaction mixture was extracted with EtOAc three times. The combined organic layers were dried over  $\text{Na}_2\text{SO}_4$ , filtered, and concentrated *in vacuo*. The crude residue was purified by flash chromatography on silica gel (3:1 hexane/EtOAc) to afford alkyne ketone **9** (182 mg, 99% yield) as a yellow oil.

$[\alpha]_{\text{D}}^{25}$   $-166.1$  ( $c$  4.5,  $\text{CHCl}_3$ ); IR (neat) 3280, 2959, 2215, 1732, 1666, 1399, 763  $\text{cm}^{-1}$ ;  $^1\text{H}$  NMR (400 MHz,  $\text{CDCl}_3$ )  $\delta$  6.88 (br s, 1H), 4.06 (d,  $J = 2.9$  Hz, 1H), 3.25 (s, 3H), 2.07 (s, 3H), 1.93 (sept,  $J = 6.3$  Hz, 1H), 1.75 (dd,  $J = 14.6, 5.4$  Hz, 1H), 1.64 (dd,  $J = 14.6, 7.8$  Hz, 1H), 1.01 (d,  $J = 6.3$  Hz, 3H), 0.97 (d,  $J = 6.3$  Hz, 3H);  $^{13}\text{C}$  NMR (100 MHz,  $\text{CDCl}_3$ )  $\delta$  175.5, 167.7, 96.3, 88.8, 77.6, 63.7, 61.9, 49.6, 42.3, 24.0, 23.8, 23.5, 4.5; HRMS (FAB-DFMS)  $m/z$ :  $[\text{M}+\text{H}]^+$  Calcd for  $\text{C}_{13}\text{H}_{18}\text{NO}_4$  252.1236; Found 252.1245.

(1*R*,4*R*,5*R*)-4-Isobutyl-4-methoxy-1-(3-methoxybut-2-enoyl)-6-oxa-3-azabicyclo[3.1.0]hexan-2-one (**15**)

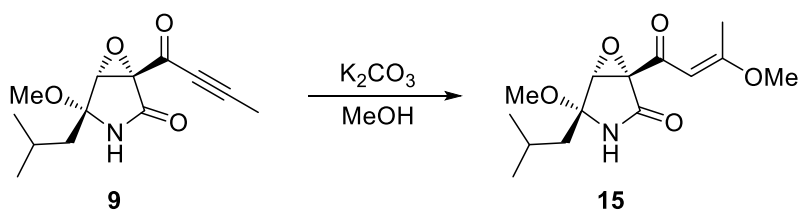

A solution of alkynyl ketone **9** (32.5 mg, 0.129 mmol) in MeOH (1.5 mL) was added to a suspension of K<sub>2</sub>CO<sub>3</sub> (18 mg, 0.13 mmol) in MeOH (12 mL) over 5 min at 0 °C. After stirring for 10 min, the reaction was concentrated *in vacuo*. The crude residue was purified by flash chromatography on silica gel (3:1 hexane/EtOAc) to afford methoxy vinylogous ester **15** (34 mg, 93% yield) as a yellow oil.

[ $\alpha$ ]<sub>D</sub><sup>26</sup> -60.9 (*c* 1.5, CHCl<sub>3</sub>); IR (neat) 3284, 2957, 1728, 1577, 1060, 810 cm<sup>-1</sup>; <sup>1</sup>H NMR (400 MHz, CDCl<sub>3</sub>)  $\delta$  6.41 (br s, 1H), 5.80 (s, 1H), 3.91 (d, *J* = 2.4 Hz, 1H), 3.71 (s, 3H), 3.27 (s, 3H), 2.37 (s, 3H), 1.94 (sept, *J* = 6.8 Hz, 1H), 1.72 (dd, *J* = 14.6, 5.9 Hz, 1H), 1.67 (dd, *J* = 14.6, 7.8 Hz, 1H), 1.02 (d, *J* = 6.8 Hz, 3H), 0.97 (d, *J* = 6.3 Hz, 3H); <sup>13</sup>C NMR (100 MHz, CDCl<sub>3</sub>)  $\delta$  186.5, 178.0, 169.6, 94.5, 88.7, 63.4, 61.7, 56.1, 49.7, 42.8, 24.1, 23.9, 23.5, 20.7; HRMS (FAB-DFMS) *m/z*: [M+H]<sup>+</sup> Calcd for C<sub>14</sub>H<sub>21</sub>NO<sub>5</sub> 284.1498; Found 284.1506.

(1*R*,4*R*,5*R*)-4-Isobutyl-4-methoxy-1-(3-((4-methoxybenzyl)oxy)but-2-enoyl)-6-oxa-3-azabicyclo[3.1.0]hexan-2-one (**18**)

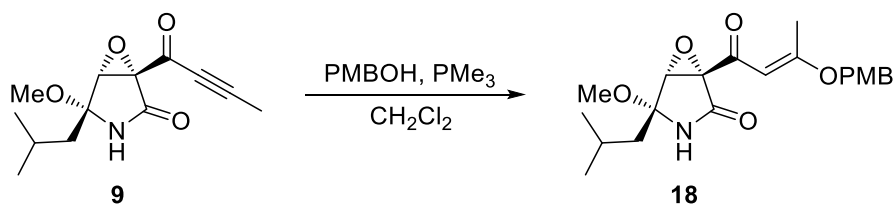

A solution of **9** (73 mg, 0.29 mmol) in CH<sub>2</sub>Cl<sub>2</sub> (9 mL) was slowly added to a stirred solution of PMBOH (120 mg, 0.868 mmol) and PMe<sub>3</sub> (1.0 M in THF 0.06 mL, 0.06 mmol) in CH<sub>2</sub>Cl<sub>2</sub> (20 mL) over 5 min at -20 °C. After stirring for 1 h, the reaction mixture was diluted with *n*-hexane and concentrated *in vacuo*. The crude residue was purified by flash chromatography on silica gel (3:1 hexane/EtOAc) to afford **18** (101 mg, 89% yield) as a yellow oil.

[ $\alpha$ ]<sub>D</sub><sup>23</sup> -66.4 (*c* 2.1, CHCl<sub>3</sub>); IR (neat) 3284, 2957, 1726, 1573, 1252, 1033, 824, 758 cm<sup>-1</sup>; <sup>1</sup>H NMR (300 MHz, CDCl<sub>3</sub>)  $\delta$  7.29 (d, *J* = 8.8 Hz, 2H), 6.92 (d, *J* = 8.8 Hz, 2H), 5.96 (s, 1H), 5.92 (br s, 1H), 4.86 (s, 2H), 3.91 (d, *J* = 2.7 Hz, 1H), 3.82 (s, 3H), 3.27 (s, 3H), 2.42 (s, 3H), 1.95 (sept, *J* = 6.8 Hz, 1H), 1.71 (dd, *J* = 6.8, 1.6 Hz, 2H), 1.04 (d, *J* = 6.8 Hz, 3H), 0.99 (d, *J* = 6.8 Hz, 3H); <sup>13</sup>C NMR (100 MHz, CDCl<sub>3</sub>)  $\delta$  186.4, 177.0, 169.4, 159.9, 129.7 (2C), 126.8, 114.1 (2C), 95.6, 88.6, 70.9, 63.4, 61.6, 55.3, 49.7, 43.0, 24.1, 23.9, 23.6, 21.0; HRMS (FAB-DFMS) *m/z*: [M+H]<sup>+</sup> Calcd for C<sub>21</sub>H<sub>27</sub>NO<sub>6</sub> 390.1917; Found 390.1910.

(+)-Rubrobramide (**1**)

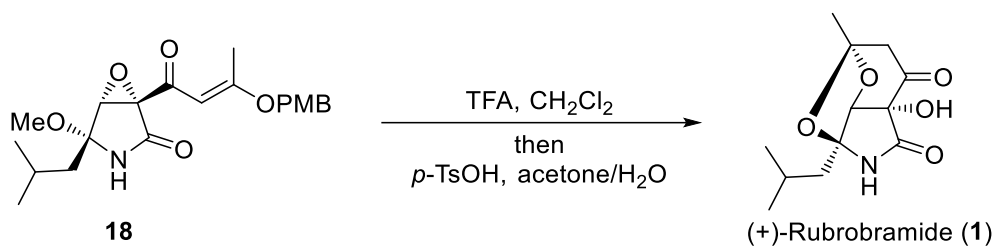

TFA (0.1 mL) was added to a stirred solution of *p*-methoxy benzyloxy vinyllogous ester **18** (44 mg, 0.11 mmol) in CH<sub>2</sub>Cl<sub>2</sub> (10 mL). The reaction mixture was stirred at room temperature for 18 h and concentrated with toluene *in vacuo*. The crude product was used in the next reaction without further purification.

*p*-TsOH (33 mg, 0.17 mmol) was added to a stirred solution of the crude product in acetone (4.5 mL) and H<sub>2</sub>O (1.5 mL). The reaction mixture was heated to reflux (oil bath) and stirred for 6 days. The reaction was quenched by addition of saturated aqueous NaHCO<sub>3</sub>. The mixture was extracted with CHCl<sub>3</sub> three times, and the organic layers were dried over Na<sub>2</sub>SO<sub>4</sub>, filtered, and concentrated *in vacuo*. The crude residue was purified by flash chromatography on silica gel (3:1 hexane/EtOAc) to afford **1** (14.6 mg, 51% yield) as a colorless solid.

m.p. 131-132.5 °C; [ $\alpha$ ]<sub>D</sub><sup>24</sup> +224.1 (*c* 0.63, CHCl<sub>3</sub>); IR (CHCl<sub>3</sub>) 3275, 2959, 1748, 1717, 1389, 1230, 1191, 757 cm<sup>-1</sup>; <sup>1</sup>H NMR (400 MHz, CDCl<sub>3</sub>)  $\delta$  6.58 (br s, 1H), 4.88 (s, 1H), 4.23 (s, 1H), 2.97 (d, *J* = 18.5 Hz, 1H), 2.85 (d, *J* = 18.5 Hz, 1H), 1.92-1.87 (m, 1H), 1.86-1.81 (m, 2H), 1.63 (s, 3H), 1.03 (d, *J* = 6.5 Hz, 3H), 1.02 (d, *J* = 6.5 Hz, 3H); <sup>13</sup>C NMR (100 MHz, CDCl<sub>3</sub>)  $\delta$  199.2, 168.4, 109.1, 92.8, 86.5, 82.4, 48.6, 45.5, 25.2, 24.3, 23.7, 23.5; HRMS (FAB-DFMS) *m/z*: [M+H]<sup>+</sup> Calcd for C<sub>12</sub>H<sub>18</sub>NO<sub>5</sub> 256.1185; Found 256.1184.

(5*S*,8*R*,9*R*)-8,9-Dihydroxy-8-isobutyl-2-methyl-1-oxa-7-azaspiro[4.4]non-2-ene-4,6-dione (**16**)

(5*S*,8*S*,9*R*)-8,9-Dihydroxy-8-isobutyl-2-methyl-1-oxa-7-azaspiro[4.4]non-2-ene-4,6-dione (**17**)

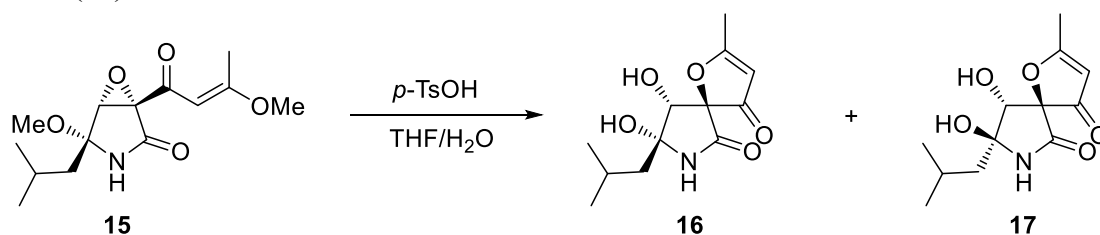



*p*-TsOH (19.5 mg, 0.103 mmol) was added to a stirred solution of methoxy vinylogous ester **15** (29.1 mg, 0.103 mmol) in THF (9 mL) and H<sub>2</sub>O (1 mL). The reaction mixture was stirred at 40 °C for 5 days. The reaction was diluted with CHCl<sub>3</sub> and H<sub>2</sub>O and extracted with CHCl<sub>3</sub> three times. The organic layers were dried over Na<sub>2</sub>SO<sub>4</sub>, filtered, and concentrated *in vacuo*. The crude residue was purified by flash chromatography on silica gel (1:1 to 1:3 hexane/EtOAc) to afford **16** (19.0 mg, 72% yield) and **17** (7.1 mg, 27% yield) as colorless solids.

Compound **16**: m.p. 136-139.5 °C; [ $\alpha$ ]<sub>D</sub><sup>25</sup> -27.8 (*c* 0.17, CHCl<sub>3</sub>); IR (CHCl<sub>3</sub>) 3281, 2958, 1731, 1686, 1596, 1336, 1162, 1124, 756 cm<sup>-1</sup>; <sup>1</sup>H NMR (400 MHz, DMSO-*d*<sub>6</sub>)  $\delta$  9.33 (br s, 1H), 6.05 (d, *J* = 5.9 Hz, 1H), 5.70 (s, 1H), 5.35 (s, 1H), 4.35 (d, *J* = 5.9 Hz, 1H), 2.37 (s, 3H), 1.85 (sept, *J* = 6.8 Hz, 1H), 1.62 (dd, *J* = 14.4, 6.3 Hz, 1H), 1.58 (dd, *J* = 14.4, 6.3 Hz, 1H), 0.92 (d, *J* = 6.8 Hz, 3H), 0.92 (d, *J* = 6.8 Hz, 3H); <sup>13</sup>C NMR (100 MHz, DMSO-*d*<sub>6</sub>)  $\delta$  194.8, 164.1, 103.8, 95.9, 85.3, 73.9, 45.4, 24.3, 23.9, 23.4, 16.6; HRMS (FAB-DFMS) *m/z*: [M+Na]<sup>+</sup> Calcd for C<sub>12</sub>H<sub>17</sub>NO<sub>5</sub>Na 278.1004; Found 278.1004.

Compound **17**: m.p. 146.5 °C (decomp.); [ $\alpha$ ]<sub>D</sub><sup>25</sup> +25.3 (*c* 0.17, MeOH); IR (CHCl<sub>3</sub>) 3410, 3243, 2952, 2959, 2867, 1732, 1680, 1584, 1338, 1157, 1127 cm<sup>-1</sup>; <sup>1</sup>H NMR (400 MHz, DMSO-*d*<sub>6</sub>)  $\delta$  8.95 (br s, 1H), 5.97 (d, *J* = 5.9 Hz, 1H), 5.78 (s, 1H), 5.44 (s, 1H), 4.38 (d, *J* = 5.9 Hz, 1H), 2.27 (s, 3H), 2.02 (dd, *J* = 14.1, 4.9 Hz, 1H), 1.94 (sept, *J* = 6.8 Hz, 1H), 1.59 (dd, *J* = 14.1, 6.8 Hz, 1H), 0.95 (d, *J* = 6.8 Hz, 3H), 0.92 (d, *J* = 6.8 Hz, 3H); <sup>13</sup>C NMR (100 MHz, DMSO-*d*<sub>6</sub>)  $\delta$  197.1, 190.9, 163.7, 103.8, 94.8, 87.6, 81.8, 43.8, 25.0, 24.8, 22.5, 16.3; HRMS (FAB-DFMS) *m/z*: [M+Na]<sup>+</sup> Calcd for C<sub>12</sub>H<sub>17</sub>NO<sub>5</sub>Na 278.1004; Found 278.1000.

(1*R*,4*R*,5*R*)-4-Isobutyl-4-methoxy-1-(4-phenylbut-2-ynoyl)-6-oxa-3-azabicyclo[3.1.0]hexan-2-one (**10**)

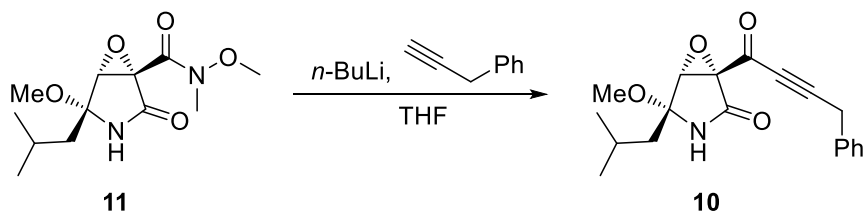

*n*-BuLi (0.93 mmol, 2.65 M in 0.35 mL *n*-hexane) was added to a stirred solution of 3-phenyl-1-propyne (74 mg, 0.27 mmol) in THF (5 mL) at -78 °C. After stirring for 30 min, lactam **11** (74 mg, 0.27 mmol) in THF (2 mL) was added. The reaction mixture was heated to -45 °C and stirred for 2 h. The reaction was quenched by addition of AcOH (0.05 mL, 0.29 mmol) in THF (1 mL) and H<sub>2</sub>O, and the mixture was extracted with EtOAc three

times. The combined organic layers were dried over Na<sub>2</sub>SO<sub>4</sub>, filtered, and concentrated *in vacuo*. The crude residue was purified by flash chromatography on silica gel (3:1 hexane/EtOAc) to afford alkynyl ketone **10** (87 mg, 98% yield) as a yellow oil.

$[\alpha]_{\text{D}}^{23} +6.5$  (*c* 5.6, CHCl<sub>3</sub>); IR (neat) 3259, 2958, 2213, 1728, 1668, 1398, 761, 698 cm<sup>-1</sup>; <sup>1</sup>H NMR (300 MHz, CDCl<sub>3</sub>) δ 7.37-7.28 (m, 5H), 5.68 (br s, 1H), 4.07 (d, *J* = 2.7 Hz, 1H), 3.84 (s, 2H), 3.22 (s, 3H), 1.94 (sept, *J* = 6.6 Hz, 1H), 1.71 (d, *J* = 6.6 Hz, 2H), 1.03 (d, *J* = 6.6 Hz, 3H), 0.99 (d, *J* = 6.6 Hz, 3H); <sup>13</sup>C NMR (100 MHz, CDCl<sub>3</sub>) δ 175.4, 167.7, 133.4, 128.8 (2C), 127.9 (2C), 127.3, 97.2, 88.8, 79.6, 63.8, 62.1, 49.6, 42.3, 25.5, 24.0, 23.8, 23.4; HRMS (FAB-DFMS) *m/z*: [M+H]<sup>+</sup> Calcd for C<sub>19</sub>H<sub>22</sub>NO<sub>4</sub> 328.1549; Found 328.1555.

(1*R*,4*R*,5*R*)-4-Isobutyl-4-methoxy-1-(3-((4-methoxybenzyl)oxy)-4-phenylbut-2-enoyl)-6-oxa-3-azabicyclo[3.1.0]hexan-2-one (**24**)

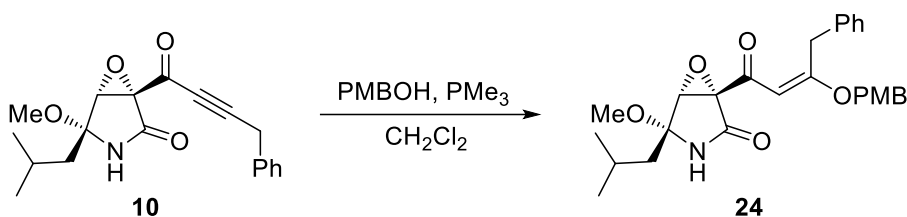

A solution of alkynyl ketone **10** (44.0 mg, 0.134 mmol) in CH<sub>2</sub>Cl<sub>2</sub> (3 mL) was slowly added to a stirred solution of PMBOH (56 mg, 0.41 mmol) and PMe<sub>3</sub> (1.0 M in THF, 0.05 mL, 0.05 mmol) in CH<sub>2</sub>Cl<sub>2</sub> (10 mL) over 8 min at -20 °C. After stirring for 2 h, the reaction mixture was diluted with *n*-hexane and concentrated *in vacuo*. The crude residue was purified by flash chromatography on silica gel (3:1 hexane/EtOAc) to afford *p*-methoxy benzyloxy vinylogous ester **24** (20.1 mg, 32% yield) as a yellow oil.

$[\alpha]_{\text{D}}^{22} -52.5$  (*c* 1.2, CHCl<sub>3</sub>); IR (neat) 3275, 2956, 2937, 1726, 1570, 1251, 822 cm<sup>-1</sup>; <sup>1</sup>H NMR (400 MHz, CDCl<sub>3</sub>) δ 7.38-7.20 (m, 5H), 7.19 (d, *J* = 8.8 Hz, 2H), 6.88 (d, *J* = 8.8 Hz, 2H), 6.05 (br s, 1H), 5.96 (s, 1H), 4.86 (s, 2H), 4.25 (d, *J* = 13.7 Hz, 1H), 4.12 (d, *J* = 13.7 Hz, 1H), 3.90 (d, *J* = 2.4 Hz, 1H), 3.81 (s, 3H), 3.24 (s, 3H), 1.94 (sept, *J* = 6.8 Hz, 1H), 1.71 (s, 1H), 1.70 (d, *J* = 2.4 Hz, 1H), 1.03 (d, *J* = 6.8 Hz, 3H), 0.99 (d, *J* = 6.8 Hz, 3H); <sup>13</sup>C NMR (100 MHz, CDCl<sub>3</sub>) δ 186.1, 177.1, 169.2, 159.8, 136.9, 129.4 (2C), 129.3 (2C), 128.3 (2C), 126.8, 126.6, 114.0 (2C), 95.8, 88.6, 70.9, 63.5, 61.6, 55.3, 49.6, 42.9, 38.7, 24.1, 23.9, 23.5; HRMS (FAB-DFMS) *m/z*: [M+H]<sup>+</sup> Calcd for C<sub>27</sub>H<sub>32</sub>NO<sub>6</sub> 466.2230; Found 466.2235.

(-)-Talamamide (**2**)

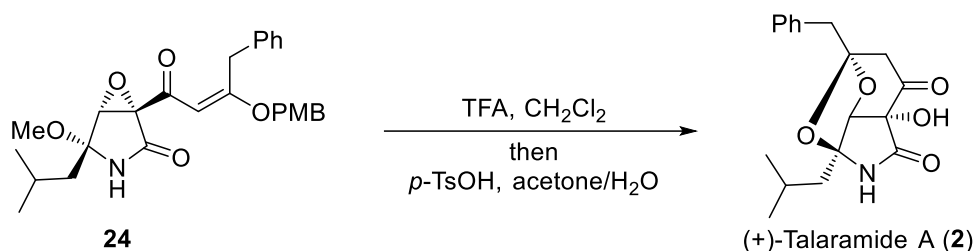

TFA (0.05 mL) was added to a stirred solution of **24** (28 mg, 0.060 mmol) in CH<sub>2</sub>Cl<sub>2</sub> (5 mL). The reaction mixture was stirred at room temperature for 19 h and concentrated with toluene *in vacuo*. The crude product was used in the next reaction without further purification.

*p*-TsOH (11 mg, 0.058 mmol) was added to a stirred solution of the crude product in acetone (3 mL) and H<sub>2</sub>O (1 mL). The reaction mixture was heated to reflux (oil bath) and stirred for 5 days. The reaction was quenched by addition of saturated aqueous NaHCO<sub>3</sub>. The mixture was extracted with CHCl<sub>3</sub> three times, the organic layers were dried over Na<sub>2</sub>SO<sub>4</sub>, filtered, and concentrated *in vacuo*. The crude residue was purified by flash chromatography on silica gel (5:1 to 3:1 hexane/EtOAc) to afford talaramide (**2**) (12 mg, 62% yield) as a colorless solid.

m.p. 168-173 °C; [α]<sub>D</sub><sup>24</sup> +163.1 (*c* 0.82, CHCl<sub>3</sub>); IR (CHCl<sub>3</sub>) 3312, 3216, 2964, 2930, 1744, 1720, 760 cm<sup>-1</sup>; <sup>1</sup>H NMR (400 MHz, DMSO-*d*<sub>6</sub>) δ 9.37 (s, 1H), 7.33-7.23 (m, 5H), 6.58 (s, 1H), 4.76 (s, 1H), 3.11 (s, 2H), 2.79 (d, *J* = 18.5 Hz, 1H), 2.68 (d, *J* = 18.5 Hz, 1H), 1.71-1.62 (m, 1H), 1.58-1.51 (m, 2H), 0.84 (d, *J* = 7.3 Hz, 3H), 0.83 (d, *J* = 7.3 Hz, 3H); <sup>13</sup>C NMR (100 MHz, DMSO-*d*<sub>6</sub>) δ 200.3, 168.7, 134.4, 130.7 (2C), 127.9 (2C), 126.7, 108.7, 93.0, 86.3, 83.2, 47.5, 44.2, 43.1, 23.8, 23.4, 23.0; HRMS (FAB-DFMS) *m/z*: [M+H]<sup>+</sup> Calcd for C<sub>18</sub>H<sub>22</sub>NO<sub>5</sub> 332.1498; Found 332.1500.

(1*R*,4*R*,5*R*)-4-Isobutyl-4-methoxy-1-(3-methoxy-4-phenylbut-2-enoyl)-6-oxa-3-azabicyclo[3.1.0]hexan-2-one (**25**)

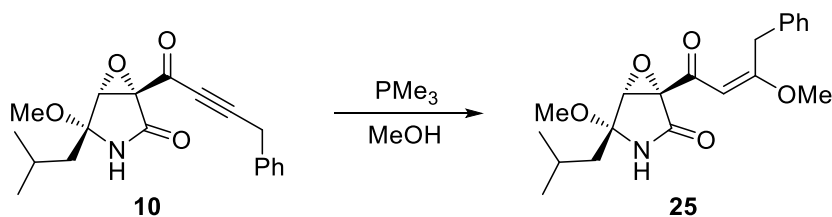

A solution of alkynyl ketone **10** (38.1 mg, 0.122 mmol) in CH<sub>2</sub>Cl<sub>2</sub> (2 mL) was slowly added to a stirred solution of MeOH (0.05 mL, 1.2 mmol) and PMe<sub>3</sub> (1.0 M in THF, 0.02

mL, 0.02 mmol) in CH<sub>2</sub>Cl<sub>2</sub> (10 mL) over 8 min at –20 °C. Additional PMe<sub>3</sub> (1.0 M in THF, 0.02 mL, 0.02 mmol) was added after stirring for 50 min and for 1.5 h. After stirring for 30 min, the reaction mixture was diluted with *n*-hexane and concentrated *in vacuo*. The crude residue was purified by flash chromatography on silica gel (3:1 hexane/EtOAc) to afford vinylogous ester **25** (25.2 mg, 60% yield) as a red oil.

$[\alpha]_D^{26}$  –94.1 (*c* 1.35, CHCl<sub>3</sub>); IR (neat) 3273, 2957, 1727, 1574, 1150, 812, 759, 701 cm<sup>-1</sup>; <sup>1</sup>H NMR (400 MHz, CDCl<sub>3</sub>) δ 7.35-7.18 (m, 5H), 6.39 (br s, 1H), 5.85 (s, 1H), 4.24 (d, *J* = 13.7 Hz, 1H), 4.09 (d, *J* = 13.7 Hz, 1H), 3.94 (d, *J* = 2.4 Hz, 1H), 3.71 (s, 3H), 3.27 (s, 3H), 1.94 (sept, *J* = 6.3 Hz, 1H), 1.73 (dd, *J* = 14.6, 5.9 Hz, 1H), 1.68 (dd, *J* = 14.6, 7.3 Hz, 1H), 1.03 (d, *J* = 6.3 Hz, 3H), 0.99 (d, *J* = 6.3 Hz, 3H); <sup>13</sup>C NMR (100 MHz, CDCl<sub>3</sub>) δ 186.5, 178.2, 169.5, 136.8, 129.2 (2C), 128.3 (2C), 126.6, 94.7, 88.7, 63.4, 61.7, 56.4, 49.7, 42.7, 38.5, 24.1, 23.9, 23.5; HRMS (FAB-DFMS) *m/z*: [M+H]<sup>+</sup> Calcd for C<sub>20</sub>H<sub>25</sub>NO<sub>5</sub> 360.1811; Found 360.1809.

(–)-Berkeleyamide (**3**) and 14-*epi*-**3**

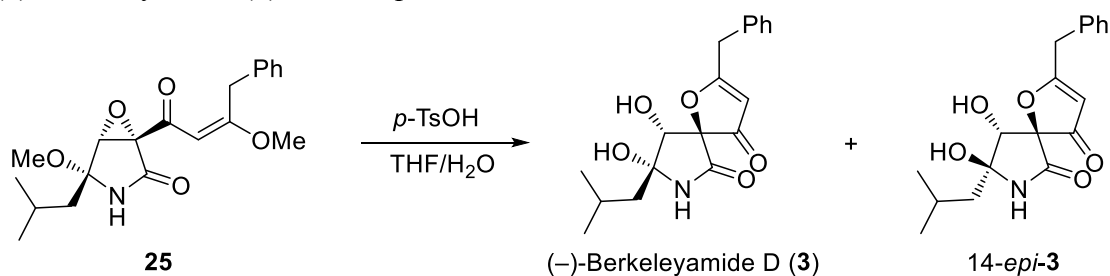

*p*-TsOH (7.4 mg, 0.039 mmol) was added to a stirred solution of **25** (14 mg, 0.039 mmol) in THF (2 mL) and H<sub>2</sub>O (0.2 mL). The reaction mixture was stirred at 40 °C for 3 days. The reaction was diluted with CHCl<sub>3</sub> and H<sub>2</sub>O and extracted with CHCl<sub>3</sub> three times. The organic layers were dried over Na<sub>2</sub>SO<sub>4</sub>, filtered, and concentrated *in vacuo*. The crude residue was purified by flash chromatography on silica gel (3:1 to 1:1 hexane/EtOAc) to afford berkeleyamide D (**3**) (6.3 mg, 49% yield) and 14-*epi*-**3** (5.4 mg, 42% yield) as colorless solids.

Berkeleyamide D (**3**): m.p. 114-121 °C;  $[\alpha]_D^{26}$  –61.1 (*c* 0.54, MeOH); IR (CHCl<sub>3</sub>) 3286, 2959, 1732, 1685, 1583, 758 cm<sup>-1</sup>; <sup>1</sup>H NMR (400 MHz, CDCl<sub>3</sub>) δ 7.39-7.29 (m, 5H), 6.72 (br s, 1H), 5.49 (s, 1H), 5.37 (s, 1H), 4.43 (d, *J* = 9.3 Hz, 1H), 4.02 (d, *J* = 17.6 Hz, 1H), 3.96 (d, *J* = 17.6 Hz, 1H), 3.03 (d, *J* = 10.2 Hz, 1H), 1.94 (sept, *J* = 6.3 Hz, 1H), 1.88 (dd, *J* = 14.6, 6.3 Hz, 1H), 1.62 (dd, *J* = 7.3, 6.3 Hz, 1H), 1.02 (d, *J* = 6.3 Hz, 3H), 1.01 (d, *J* = 6.3 Hz, 3H); <sup>13</sup>C NMR (100 MHz, CDCl<sub>3</sub>) δ 199.4, 197.8, 163.9, 133.2, 129.2 (2C), 129.0 (2C), 127.8, 104.4, 95.3, 84.9, 75.2, 45.6, 37.4, 24.0, 23.9, 23.8; HRMS (FAB-

DFMS)  $m/z$ :  $[M+H]^+$  Calcd for  $C_{18}H_{22}NO_5$  332.1498; Found 332.1497.

Compound 14-*epi*-**3**: m.p. 126.5-130.5 °C;  $[\alpha]_D^{23}$   $-18.1$  ( $c$  0.67,  $CHCl_3$ ); IR ( $CHCl_3$ ) 3474, 3363, 3019, 1744, 1710, 1675, 1572, 669  $cm^{-1}$ ;  $^1H$  NMR (400 MHz,  $DMSO-d_6$ )  $\delta$  8.96 (br s, 1H), 7.41-7.22 (m, 5H), 5.99 (d,  $J = 5.9$  Hz, 1H), 5.75 (s, 1H), 5.33 (s, 1H), 4.39 (d,  $J = 5.9$  Hz, 1H), 3.96 (s, 2H), 1.99 (d,  $J = 14.1$  Hz, 1H), 1.94 (sept,  $J = 6.8$  Hz, 1H), 1.59 (dd,  $J = 14.1, 6.8$  Hz, 1H), 0.94 (d,  $J = 6.8$  Hz, 3H), 0.92 (d,  $J = 6.8$  Hz, 3H);  $^{13}C$  NMR (100 MHz,  $DMSO-d_6$ )  $\delta$  196.9, 192.5, 163.6, 134.8, 129.0 (2C), 128.6 (2C), 127.0, 104.0, 95.0, 87.6, 81.7, 43.8, 35.9, 25.0, 24.7, 22.5; HRMS (FAB-DFMS)  $m/z$ :  $[M+H]^+$  Calcd for  $C_{18}H_{22}NO_5$  332.1498; Found 332.1520.

## NMR chemical shifts of natural products and synthetic compounds

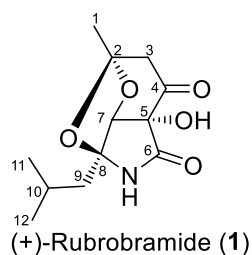

|      | Natural (CDCl <sub>3</sub> ) |                           | Synthetic (CDCl <sub>3</sub> ) |                           |
|------|------------------------------|---------------------------|--------------------------------|---------------------------|
|      | <sup>1</sup> H (500 MHz)     | <sup>13</sup> C (125 MHz) | <sup>1</sup> H (400 MHz)       | <sup>13</sup> C (100 MHz) |
| 1    | 1.61 (s)                     | 25.2                      | 1.63 (s)                       | 25.2                      |
| 2    |                              | 109.0                     |                                | 109.1                     |
| 3a   | 2.98 (d, <i>J</i> = 18.4 Hz) | 48.6                      | 2.97 (d, <i>J</i> = 18.5 Hz)   | 48.6                      |
| 3b   | 2.83 (d, <i>J</i> = 18.4 Hz) |                           | 2.85 (d, <i>J</i> = 18.5 Hz)   |                           |
| 4    |                              | 199.4                     |                                | 199.2                     |
| 5    |                              | 82.6                      |                                | 82.4                      |
| 6    |                              | 169.2                     |                                | 168.4                     |
| 7    | 4.87 (s)                     | 86.4                      | 4.88 (s)                       | 86.5                      |
| 8    |                              | 93.1                      |                                | 92.8                      |
| 9    | 1.84 (m)                     | 45.3                      | 1.86-1.81 (m)                  | 45.5                      |
| 10   | 1.87 (m)                     | 24.2                      | 1.92-1.87 (m)                  | 24.3                      |
| 11   | 1.01 (d, <i>J</i> = 6.3 Hz)  | 23.4                      | 1.02 (d, <i>J</i> = 6.5 Hz)    | 23.5                      |
| 12   | 1.01 (d, <i>J</i> = 6.3 Hz)  | 23.8                      | 1.03 (d, <i>J</i> = 6.5 Hz)    | 23.7                      |
| 5-OH | 4.42 (br s)                  |                           | 4.23 (s)                       |                           |
| 6-NH | 7.38 (br s)                  |                           | 6.58 (br s)                    |                           |

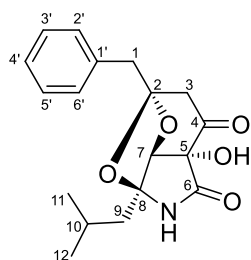

(+)-Talaramide A (**2**)

|       | Natural (DMSO- <i>d</i> <sub>6</sub> ) |                           | Synthetic (DMSO- <i>d</i> <sub>6</sub> ) |                           |
|-------|----------------------------------------|---------------------------|------------------------------------------|---------------------------|
|       | <sup>1</sup> H (500 MHz)               | <sup>13</sup> C (125 MHz) | <sup>1</sup> H (400 MHz)                 | <sup>13</sup> C (100 MHz) |
| 1     | 3.10 (s)                               | 43.1                      | 3.11 (s)                                 | 43.1                      |
| 2     |                                        | 108.7                     |                                          | 108.7                     |
| 3a    | 2.68 (d, <i>J</i> = 18.6 Hz)           | 47.5                      | 2.68 (d, <i>J</i> = 18.5 Hz)             | 47.5                      |
| 3b    | 2.78 (d, <i>J</i> = 18.6 Hz)           |                           | 2.79 (d, <i>J</i> = 18.5 Hz)             |                           |
| 4     |                                        | 200.4                     |                                          | 200.3                     |
| 5     |                                        | 83.3                      |                                          | 83.2                      |
| 6     |                                        | 168.8                     |                                          | 168.7                     |
| 7     | 4.76 (s)                               | 86.3                      | 4.76 (s)                                 | 86.3                      |
| 8     |                                        | 93.0                      |                                          | 93.0                      |
| 9     | 1.55 (m)                               | 44.3                      | 1.58-1.51 (m)                            | 44.2                      |
| 10    | 1.86 (m)                               | 23.0                      | 1.71-1.62 (m)                            | 23.0                      |
| 11    | 0.83 (d, <i>J</i> = 6.6 Hz)            | 23.4                      | 0.84 (d, <i>J</i> = 7.3 Hz)              | 23.4                      |
| 12    | 0.82 (d, <i>J</i> = 6.6 Hz)            | 23.8                      | 0.83 (d, <i>J</i> = 7.3 Hz)              | 23.8                      |
| 1'    |                                        | 134.4                     |                                          | 134.4                     |
| 2'/6' | 7.29 (m)                               | 130.7                     | 7.33-7.23 (m)                            | 130.7                     |
| 3'/5' | 7.29 (m)                               | 127.9                     | 7.33-7.23 (m)                            | 127.9                     |
| 4'    | 7.25 (m)                               | 126.8                     | 7.33-7.23 (m)                            | 126.7                     |
| 5-OH  | 6.59 (br s)                            |                           | 6.58 (s)                                 |                           |
| 6-NH  | 9.37 (s)                               |                           | 9.37 (s)                                 |                           |

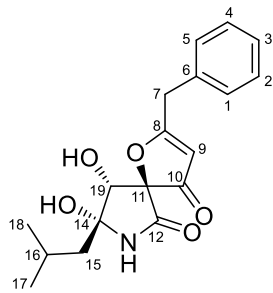

(-)-Berkeleyamide D (**3**)

|          | Natural (CDCl <sub>3</sub> )                               |                          | Synthetic (CDCl <sub>3</sub> )                                        |                           |
|----------|------------------------------------------------------------|--------------------------|-----------------------------------------------------------------------|---------------------------|
|          | <sup>1</sup> H (300 MHz)                                   | <sup>13</sup> C (75 MHz) | <sup>1</sup> H (400 MHz)                                              | <sup>13</sup> C (100 MHz) |
| 1, 5     | 7.33 (m)                                                   | 129.2                    | 7.39-7.29 (m)                                                         | 129.2                     |
| 2, 4     | 7.33 (m)                                                   | 129.0                    | 7.39-7.29 (m)                                                         | 129.0                     |
| 3        | 7.33 (m)                                                   | 127.0                    | 7.39-7.29 (m)                                                         | 127.8                     |
| 6        |                                                            | 133.2                    |                                                                       | 133.2                     |
| 7        | 3.98 (d, <i>J</i> = 17.4 Hz), 3.96 (d, <i>J</i> = 17.4 Hz) | 37.4                     | 4.02 (d, <i>J</i> = 17.6 Hz), 3.96 (d, <i>J</i> = 17.6 Hz)            | 37.4                      |
| 8        |                                                            | 197.8                    |                                                                       | 197.8                     |
| 9        | 5.35 (br s)                                                | 104.4                    | 5.37 (s)                                                              | 104.4                     |
| 10       |                                                            | 199.4                    |                                                                       | 199.4                     |
| 11       |                                                            | 95.3                     |                                                                       | 95.3                      |
| 12       |                                                            | 164.1                    |                                                                       | 163.9                     |
| 13       | 6.78 (br s)                                                |                          | 6.72 (br s)                                                           |                           |
| 14       |                                                            | 84.9                     |                                                                       | 84.9                      |
| 15       | 1.88 (m, 2H)                                               | 45.5                     | 1.88 (dd, <i>J</i> = 14.6, 6.3 Hz), 1.62 (dd, <i>J</i> = 7.3, 6.3 Hz) | 45.6                      |
| 16       | 1.92 (m)                                                   | 24.0                     | 1.94 (sept, <i>J</i> = 6.3 Hz)                                        | 24.0                      |
| 17       | 1.00 (d, <i>J</i> = 5.2 Hz, 3H)                            | 23.9                     | 1.02 (d, <i>J</i> = 6.3 Hz)                                           | 23.9                      |
| 18       | 0.98 (d, <i>J</i> = 5.2 Hz, 3H)                            | 23.8                     | 1.01 (d, <i>J</i> = 6.3 Hz)                                           | 23.8                      |
| 19       | 4.41 (d, <i>J</i> = 10.0 Hz)                               | 75.1                     | 4.43 (d, <i>J</i> = 9.3 Hz)                                           | 75.2                      |
| OH, C-19 | 3.04 (d, <i>J</i> = 10.0 Hz)                               |                          | 3.03 (d, <i>J</i> = 10.2 Hz)                                          |                           |
| OH, C-14 | 5.48 (br s)                                                |                          | 5.49 (s)                                                              |                           |



### B3LYP 6-311G+ (d, p) Calculated Cartesian Coordinates

In the previous studies by Tsubaki's group, **3** was obtained as a single diastereomer at the hemiaminal position (C-14), which was attributed to the large energy difference between **3** and 14-*epi*-**3** (7.2 kcal/mol, see ref 9a). However, we obtained both **3** and 14-*epi*-**3** in a 1.2:1 ratio. In addition, structurally related molecules **16** and **17** (14-*epi*-**16**) were formed in a 2.7:1 ratio.

As our results cannot be explained by the relative thermodynamic stability of the spirocyclic products, we calculated the energy difference between the plausible intermediates  $\alpha$ -**22** and  $\beta$ -**22** with a methyl substituent, which would lead to **16** and **17**, respectively (see Scheme 4 in the manuscript). The calculations revealed that the conformation of  $\alpha$ -**22** with the lowest energy was more stable than that of  $\beta$ -**22** by 0.67 kcal/mol (see S17-S20), meaning that they would be present in a ratio of 2:1~3:1. We speculate that the mixture of  $\alpha$ -**22** and  $\beta$ -**22** initially gave **16** and **17** in an almost 1:1 ratio, and over the long reaction time (3 days) for conversion of **15** to **16** and **17**, there was gradual isomerization from **17** to the more stable **16**, resulting in the 2.7:1 ratio. On the other hand, the similar reaction of **25** generated **3** and 14-*epi*-**3** in a 1.2:1 ratio, which can be rationalized by the shorter reaction time (2 days) for conversion of **25** to **3** and 14-*epi*-**3**.

Comparison of stability between  $\alpha$ -22 and  $\beta$ -22 by DFT Calculations. Conformational analyses were performed using conformational search with MMFF and energy calculation with B3LYP/6-31G\* level implemented in version 1.4.8 of the Spartan 18 software (Wavefunction, Inc., Irvine CA, America). The lower energy conformers of each compound, which differed from the most stable conformer by less than 2 kcal/mol, were optimized using DFT calculations at the B3LYP/6-311+G(d,p) level, that were implemented in the Gaussian 09 program package (Gaussian, Inc., Wallingford, CT, USA). The lowest energy conformations were determined by comparing the energies of each conformer.

$\alpha$ -22

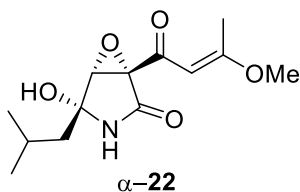

-937.665733 Hartree

Gibbs Free Energy: -588394.6241 kcal/mol

|   |           |           |           |
|---|-----------|-----------|-----------|
| N | -1.450426 | -0.214785 | 1.209393  |
| C | -1.960267 | -0.623023 | -0.067659 |
| C | -0.788129 | -1.295605 | -0.736744 |
| C | 0.376747  | -1.255416 | 0.227204  |
| C | -0.157658 | -0.611407 | 1.452888  |
| O | 0.453216  | -0.475795 | 2.498356  |
| O | -2.968759 | -1.572157 | 0.180400  |
| O | -0.298737 | -2.491846 | -0.120165 |
| C | 1.743160  | -1.083136 | -0.329310 |
| O | 2.175701  | -1.860847 | -1.172159 |
| C | 2.529327  | 0.088231  | 0.159371  |
| C | 3.609907  | 0.598404  | -0.465881 |
| O | 4.362960  | 1.661052  | 0.000894  |
| C | 4.131358  | 0.093213  | -1.785221 |
| C | 4.073225  | 2.201743  | 1.285023  |
| H | -0.663347 | -1.159877 | -1.797960 |

|   |           |           |           |
|---|-----------|-----------|-----------|
| C | -2.485553 | 0.555222  | -0.899739 |
| C | -3.517692 | 1.483654  | -0.219264 |
| C | -4.810886 | 0.773132  | 0.178486  |
| C | -3.846387 | 2.650342  | -1.157887 |
| H | -2.050267 | 0.076770  | 1.968504  |
| H | -2.519309 | -2.360868 | 0.533523  |
| H | 2.187550  | 0.518751  | 1.090259  |
| H | 4.801751  | 0.829165  | -2.243722 |
| H | 4.700872  | -0.830596 | -1.644257 |
| H | 3.323520  | -0.076696 | -2.503581 |
| H | 4.803824  | 2.989663  | 1.490614  |
| H | 3.076701  | 2.654374  | 1.301327  |
| H | 4.171777  | 1.438366  | 2.063539  |
| H | -2.927719 | 0.160932  | -1.825136 |
| H | -1.629999 | 1.173934  | -1.205615 |
| H | -3.069923 | 1.911438  | 0.686152  |
| H | -5.239100 | 0.222894  | -0.665889 |
| H | -4.643324 | 0.072115  | 1.000927  |
| H | -5.560072 | 1.493219  | 0.525763  |
| H | -4.537074 | 3.353006  | -0.679542 |
| H | -2.940083 | 3.205457  | -1.422305 |
| H | -4.310762 | 2.296076  | -2.084565 |

**$\beta$ -22**

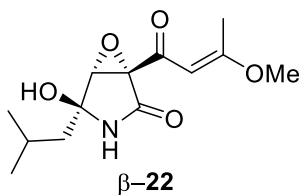

-937.664661Hartree

Gibbs Free Energy: -588393.9514 kcal/mol

|   |           |           |           |
|---|-----------|-----------|-----------|
| C | 0.274632  | -0.001288 | -0.207067 |
| C | 0.113742  | -1.515835 | -0.115715 |
| N | -1.174398 | -1.733111 | 0.297686  |
| C | -2.001742 | -0.552665 | 0.545448  |
| C | -1.041267 | 0.571640  | 0.131988  |
| O | 0.936619  | -2.377745 | -0.357424 |
| O | -0.627506 | 0.517786  | -1.221604 |
| C | -3.320393 | -0.646272 | -0.235107 |
| C | -4.411174 | 0.399052  | 0.070822  |
| C | -5.738077 | -0.065869 | -0.550293 |
| C | -4.062499 | 1.810540  | -0.423426 |
| O | -2.328655 | -0.435067 | 1.923739  |
| C | 1.565005  | 0.793991  | -0.023115 |
| O | 1.457956  | 2.000210  | 0.164762  |
| C | 2.800745  | 0.043156  | -0.101552 |
| C | 4.032100  | 0.608825  | 0.058305  |
| O | 5.173335  | -0.092984 | -0.034321 |
| C | 4.309188  | 2.050753  | 0.347162  |
| C | 5.125221  | -1.495686 | -0.325232 |
| H | -1.564670 | -2.665486 | 0.269434  |
| H | -1.128666 | 1.554885  | 0.576440  |
| H | -3.731283 | -1.638733 | -0.015634 |
| H | -3.071293 | -0.633130 | -1.301000 |
| H | -4.540360 | 0.435253  | 1.157007  |
| H | -5.658830 | -0.140361 | -1.640549 |
| H | -6.038380 | -1.046191 | -0.168667 |
| H | -6.541767 | 0.640496  | -0.325000 |

|   |           |           |           |
|---|-----------|-----------|-----------|
| H | -3.849222 | 1.812088  | -1.497561 |
| H | -4.901087 | 2.490996  | -0.250222 |
| H | -3.196606 | 2.232230  | 0.089715  |
| H | -1.520220 | -0.519143 | 2.443439  |
| H | 2.703321  | -1.012251 | -0.308500 |
| H | 3.746930  | 2.384711  | 1.220393  |
| H | 3.971055  | 2.675253  | -0.483055 |
| H | 5.378097  | 2.191867  | 0.505493  |
| H | 6.162866  | -1.821159 | -0.350066 |
| H | 4.581442  | -2.035049 | 0.453991  |
| H | 4.652582  | -1.674153 | -1.293996 |

Computations were carried out with the SPARTAN' 18 series of programs: Y. Shao, L. Y. Molnar, Y. Jung, J. Kussmann, C. Ochsenfeld, S. T. Brown, A. T. B. Gilbert, L. V. Slipchenko, S. V. Levchnko, D. P. O'Neill, R. A DiStasio Jr., R. C. Lochan, T. Wang, G. J. O. Beran, N. A. Besley, J. M. Herbert, C. Y. Lin, T. Van Voorhis, S. H. Chien, A. Sodt, R. P. Steele, V. A. Rassolov, P. E. Maslen, P. P. Korambath, R. D. Adamson, B. Austin, J. Baker, E. F. C. Byrd, H. Dachsel, R. J. Doerksen, A. Dreuw, B. D. Dunietz, A. D. Dutoi, T. R. Furlani, S. R. Gwaltney, A. Heyden, S. Hirata, C-P. Hsu, G. Kedziora, R. Z. Khalliulin, P. Klunzinger, A. M. Lee, M. S. Lee, W. Z. Liang, I. Lotan, N. Nair, B. Peters, E. I. Proynov, P. A. Pieniazek, Y. M. Rhee, J. Ritchie, E. Rosta, C. D. Sherrill, A. C. Simmonett, J. E. Subotnik, H. L. Woodcock III, W. Zhang, A. T. Bell, A. K. Chakraborty, D. M. Chipman, F. J. Keil, A. Warshel, W. J. Hehre, H. F. Schaefer, J. Kong, A. I. Krylov, P. M. W. Gill and M. Head-Gordon, *Phys. Chem. Chem. Phys.* **8**, 3172 (2006).

Computations were carried out with the GAUSSIAN 09 series of programs: Frisch, M. J., Trucks, G. W., Schlegel, H. B., Scuseria, G. E., Robb, M. A., Cheeseman, J. R., Scalmani, G., Barone, V., Mennucci, B., Petersson, G. A., Nakatsuji, H., Caricato, M., Li, X., Hratchian, H. P., Izmaylov, A. F., Bloino, J., Zheng, G., Sonnenberg, J. L., Hada, M., Ehara, M., Toyota, K., Fukuda, R., Hasegawa, J., Ishida, M., Nakajima, T., Honda, Y., Kitao, O., Nakai, H., Vreven, T., Montgomery, J. A., Jr., Peralta, J. E., Ogliaro, F., Bearpark, M., Heyd, J. J., Brothers, E., Kudin, K. N., Staroverov, V. N., Kobayashi, R., Normand, J., Raghavachari, K., Rendell, A., Burant, J. C., Iyengar, S. S., Tomasi, J., Cossi, M., Rega, N., Millam, J. M., Klene, M., Knox, J. E., Cross, J. B., Bakken, V., Adamo, C.,

Jaramillo, J., Gomperts, R., Stratmann, R. E., Yazyev, O., Austin, A. J., Cammi, R., Pomelli, C., Ochterski, J. W., Martin, R. L., Morokuma, K., Zakrzewski, V. G., Voth, G. A., Salvador, P., Dannenberg, J. J., Dapprich, S., Daniels, A. D., Farkas, Ö., Foresman, J. B., Ortiz, J. V., Cioslowski, J., Fox, D. J. Gaussian 09 Revision D.01, Gaussian, Inc.: Wallingford, CT, 2009.

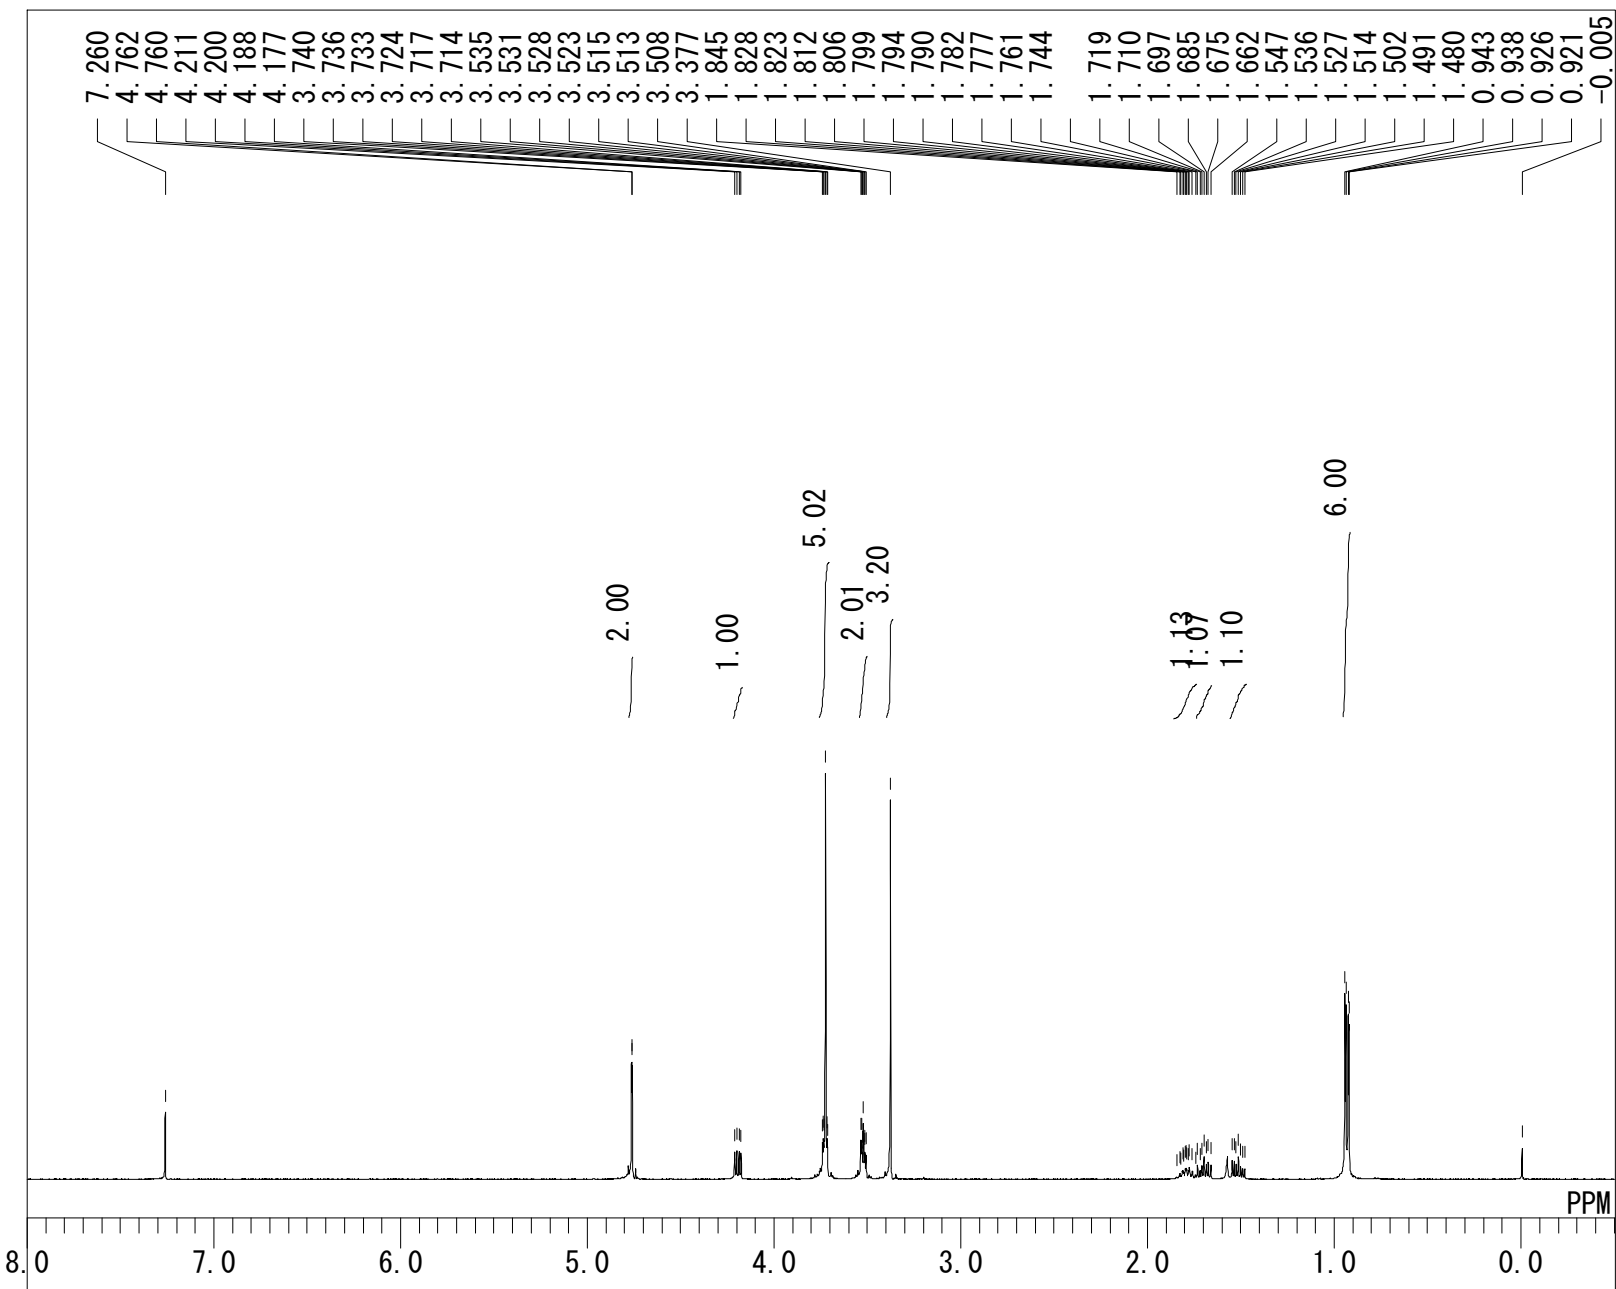

OBNUC 1H  
EXMOD NON  
OBFRQ 399.65 MHz  
OBSET 124.00 KHz  
OBFIN 10500.00 Hz  
POINT 16384  
FREQU 7992.01 Hz  
SCANS 8  
ACQTM 2.0500 sec  
PD 4.9500 sec  
PW1 5.80 usec  
IRNUC 1H  
CTEMP 24.0 c  
SLVNT CDCL3  
EXREF 7.26 ppm  
BF 0.12 Hz  
RGAIN 19

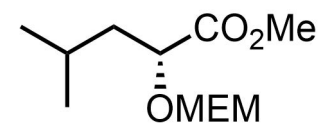

S2

<sup>1</sup>H NMR

CDCl<sub>3</sub> (400 MHz)

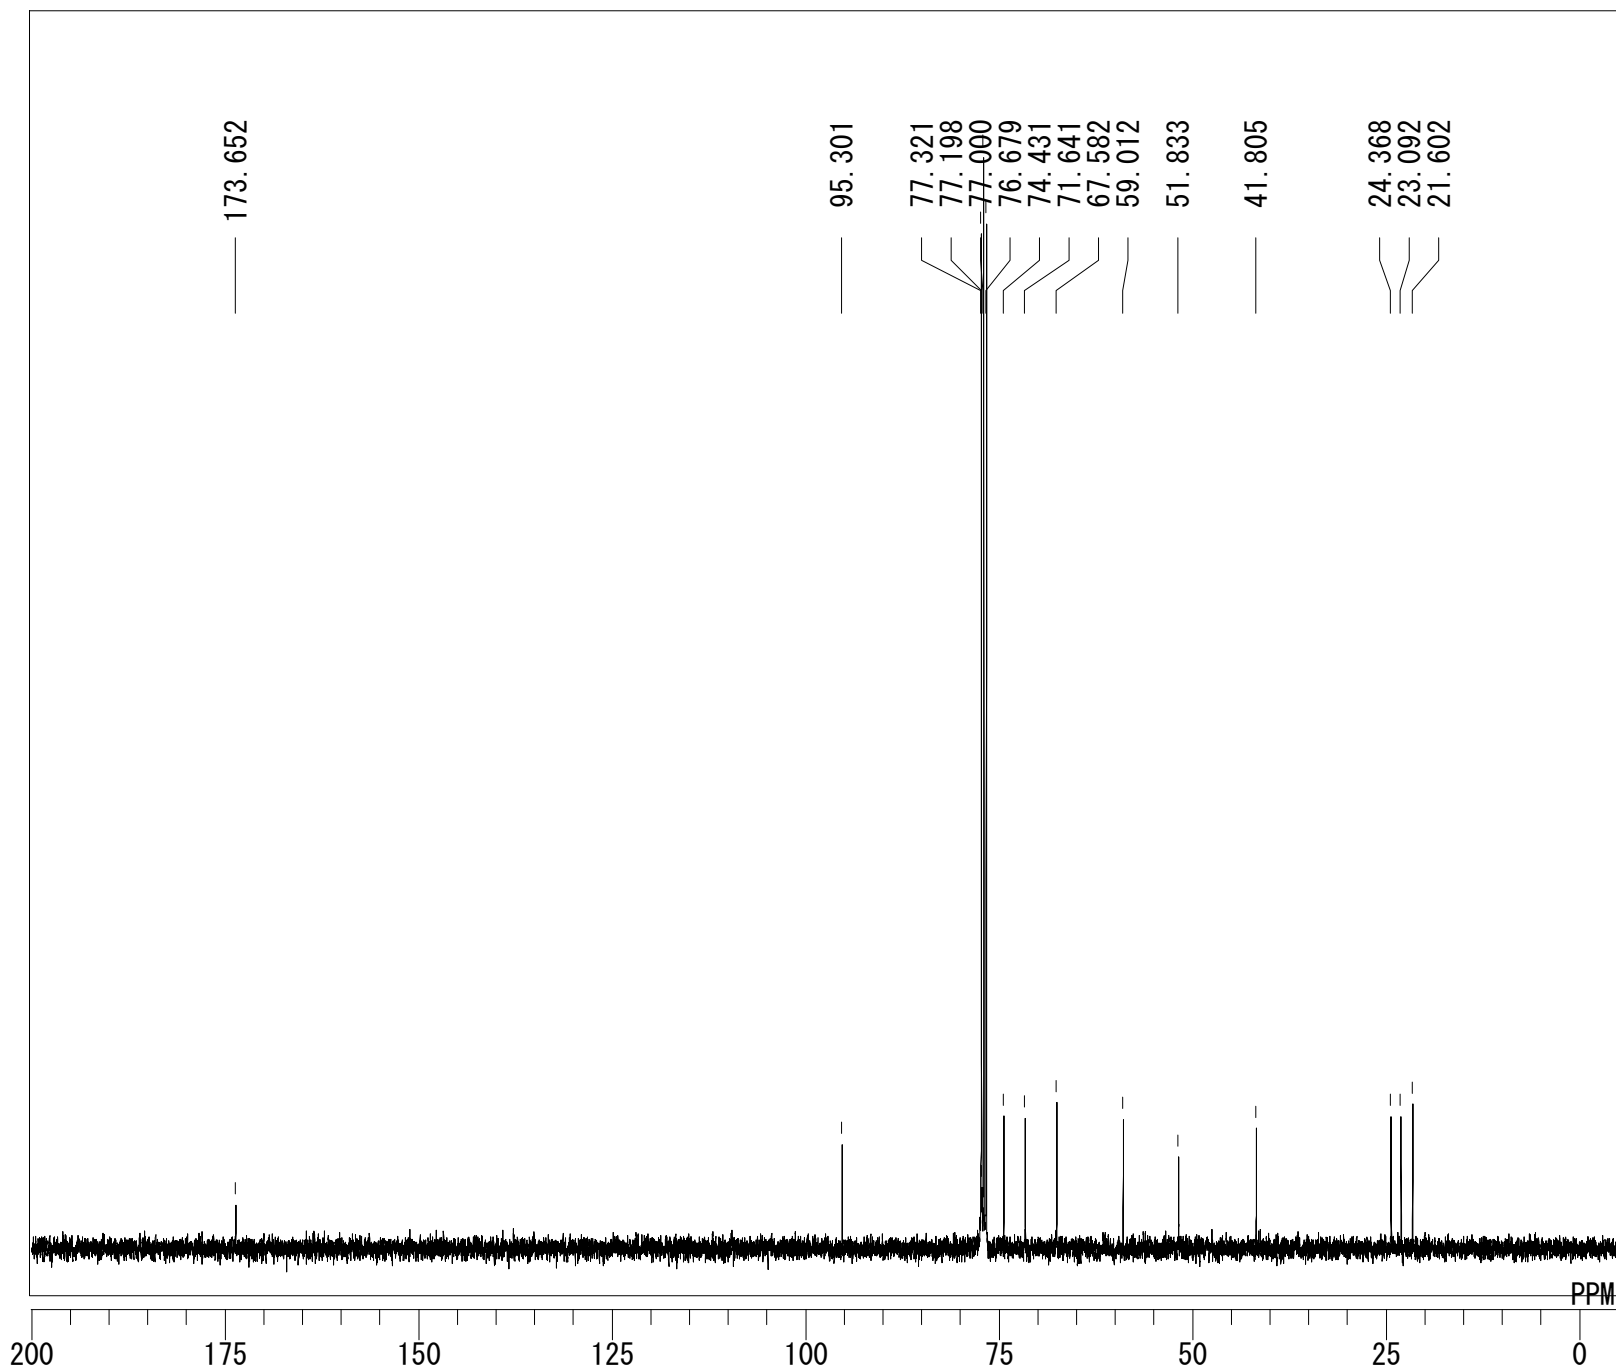

OBNUC 13C  
 EXMOD BCM  
 OBFRQ 100.40 MHz  
 OBSET 125.00 KHz  
 OBFIN 10500.00 Hz  
 POINT 32768  
 FREQU 27118.64 Hz  
 SCANS 316  
 ACQTM 1.2083 sec  
 PD 1.7920 sec  
 PW1 5.80 usec  
 IRNUC 1H  
 CTEMP 24.4 c  
 SLVNT CDCL3  
 EXREF 77.00 ppm  
 BF 1.20 Hz  
 RGAIN 25

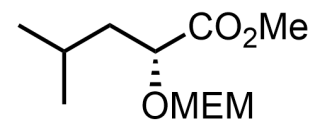

**S2**  
<sup>13</sup>C NMR  
 CDCl<sub>3</sub> (100 MHz)



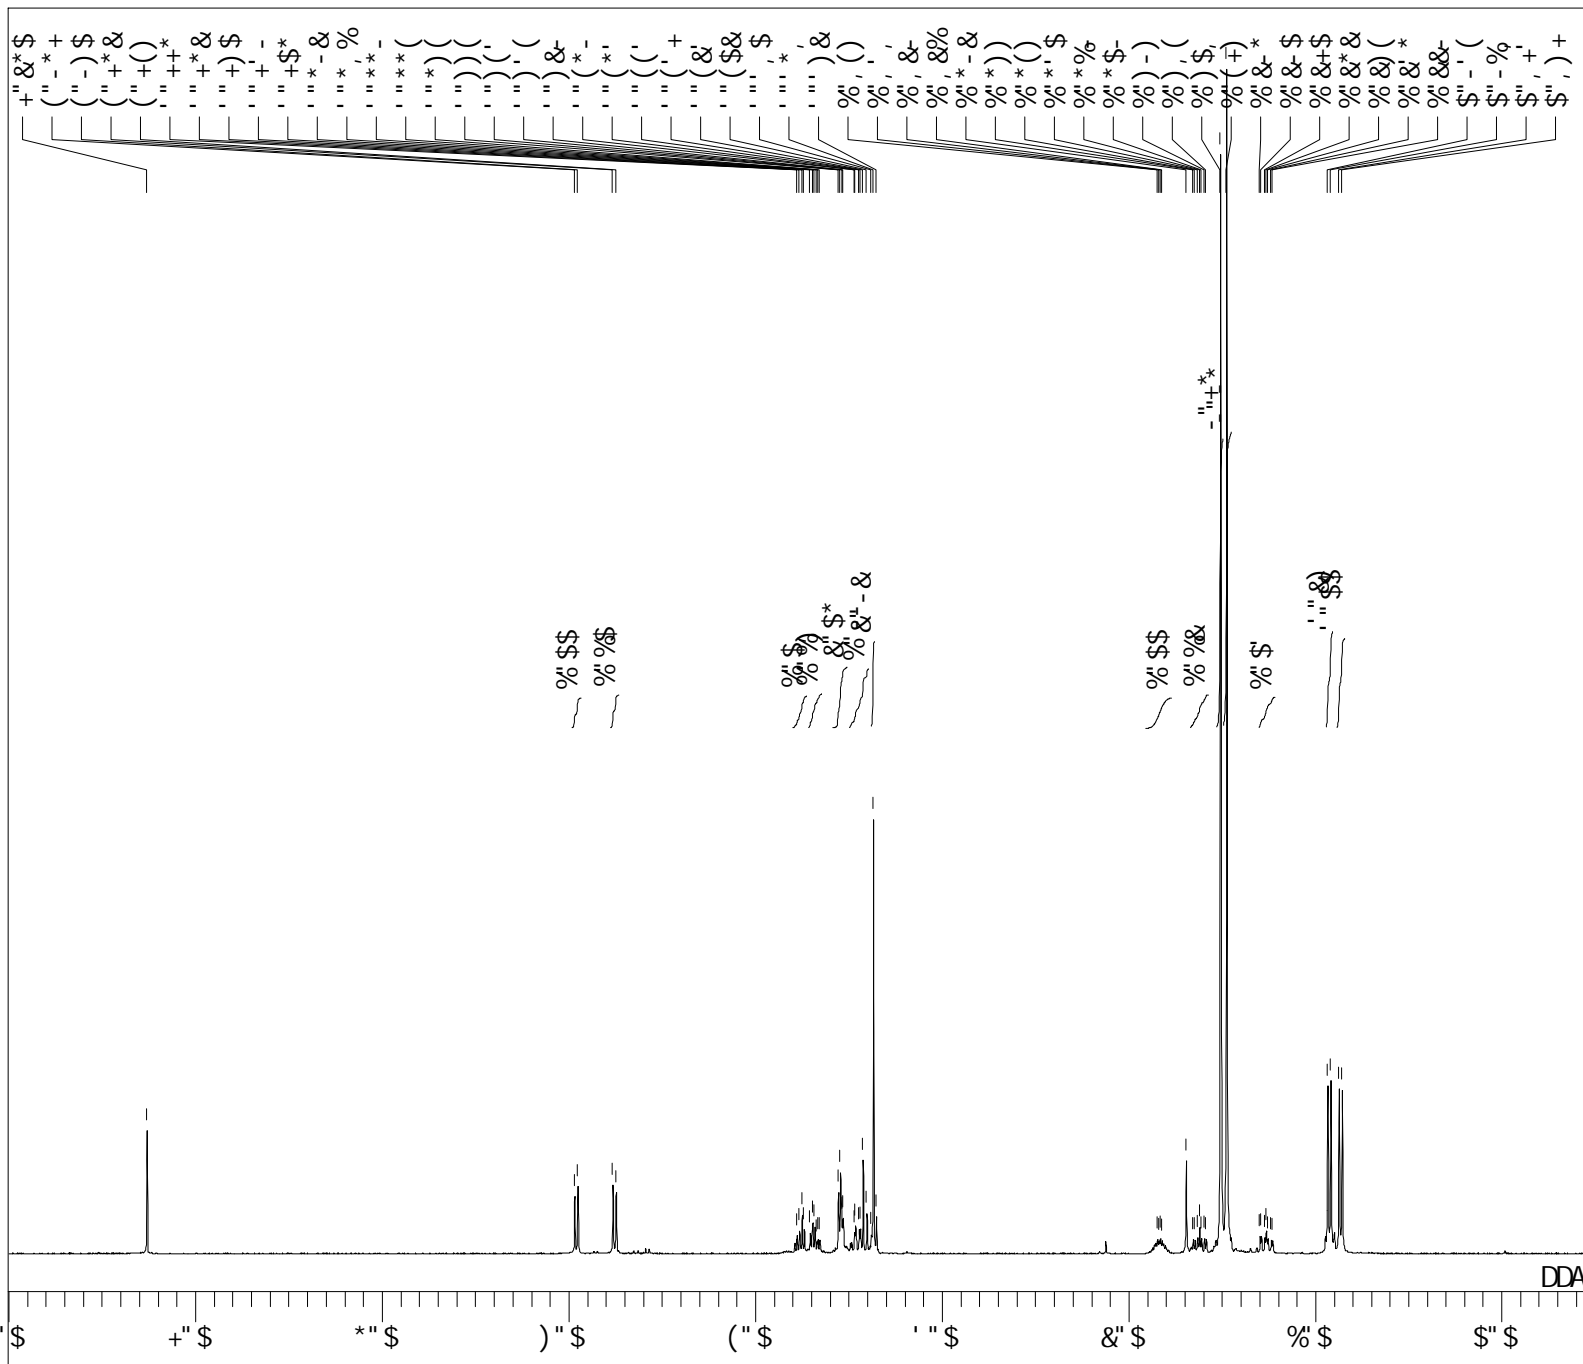

C6: FE ..... "\*) A<n  
 C6G9H ..... %&(" \$\$ ?<n  
 C6: =B ..... %&)" \$\$ \$<n  
 DC=BH ..... %\* ( <n  
 : F9EI ..... +-&" \$% <n  
 G75BG .....  
 57EHA ..... &"\$) \$\$ gYW  
 D8 ..... ("-\$) \$\$ gYW  
 DK% ..... )" \*\$ i gYW  
 =FBI 7 %<  
 7H9AD ..... &" - W  
 G@JBH 787@  
 9LF9: ..... +" &\* dda  
 6: ..... "\$ %& <n  
 F; 5=B ..... %

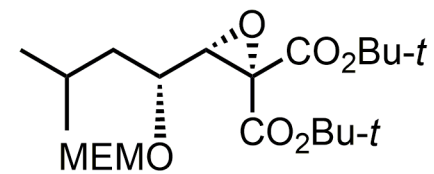

**13**  
<sup>1</sup>H NMR  
 CDCl<sub>3</sub> (400 MHz)

164.744  
163.542

94.758  
83.726  
83.594  
77.321  
77.206  
77.000  
76.687  
72.982  
71.715  
67.425  
64.272  
59.769  
58.979

40.480

27.933  
27.785  
23.792  
23.603  
21.182

OBFRQ 100.40 MHz  
OBSET 125.00 KHz  
OBFIN 10500.00 Hz  
POINT 32768  
FREQ 27118.64 Hz  
SCANS 1000  
ACQTM 1.2083 sec  
PD 1.7920 sec  
PW1 5.80 usec  
IRNUC 1H  
CTEMP 24.7 c  
SLVNT CDCL3  
EXREF 77.00 ppm  
BF 1.20 Hz  
RGAIN 25

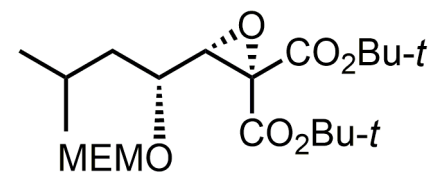

**13**

<sup>13</sup>C NMR

CDCl<sub>3</sub> (100 MHz)

PPM

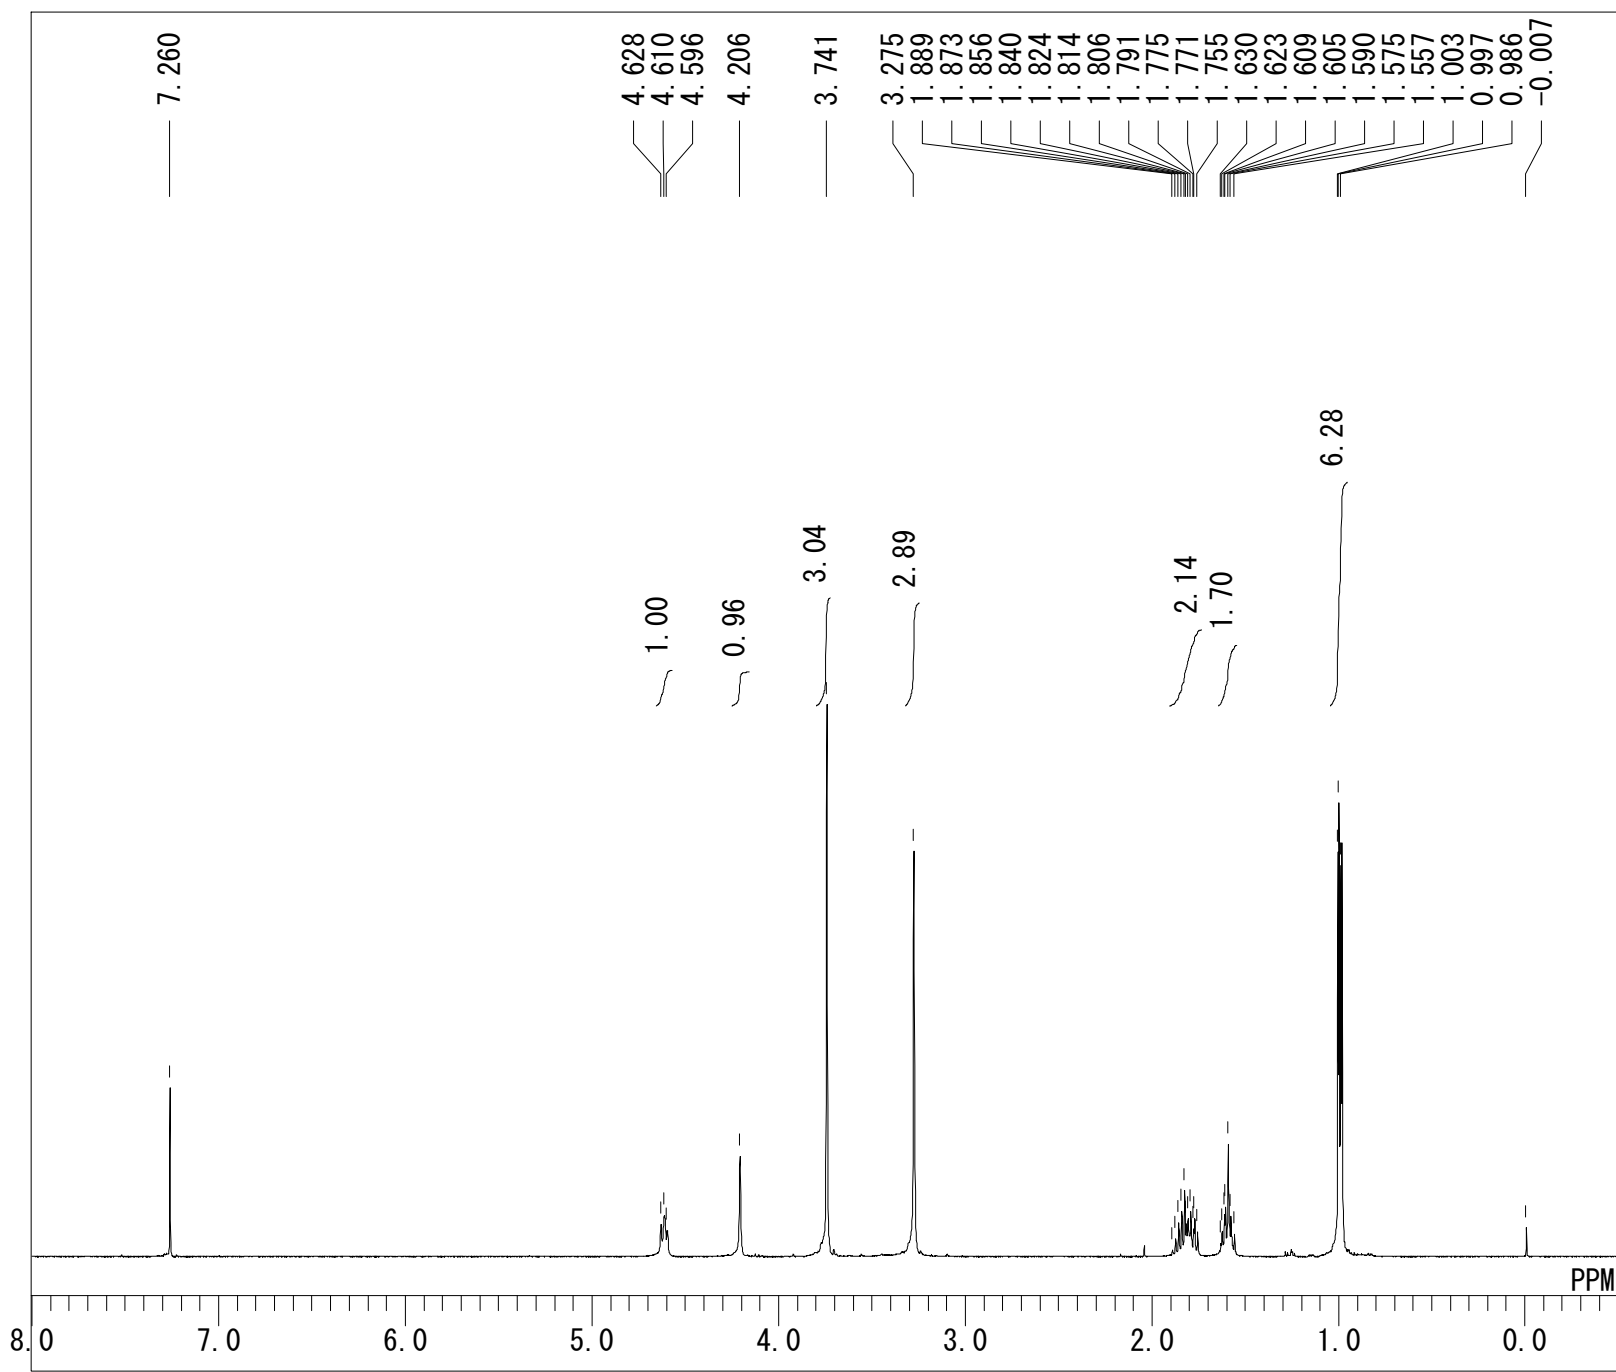

OBFRQ 399.65 MHz  
 OBSET 124.00 KHz  
 OBFIN 10500.00 Hz  
 POINT 16384  
 FREQU 7992.01 Hz  
 SCANS 8  
 ACQTM 2.0500 sec  
 PD 4.9500 sec  
 PW1 5.60 usec  
 IRNUC 1H  
 CTEMP 21.8 c  
 SLVNT CDCL3  
 EXREF 7.26 ppm  
 BF 0.09 Hz  
 RGAIN 18

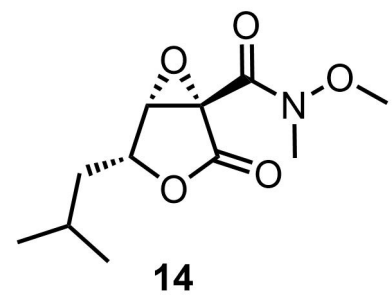

<sup>1</sup>H NMR  
CDCl<sub>3</sub> (400 MHz)

167.206  
161.467

77.321  
77.247  
77.000  
76.687

62.033  
61.276  
58.880

38.175  
32.173

24.805  
22.854  
22.137

OBFRQ 100.40 MHz  
OBSET 125.00 KHz  
OBFIN 10500.00 Hz  
POINT 32768  
FREQ 27118.64 Hz  
SCANS 600  
ACQTM 1.2083 sec  
PD 1.7920 sec  
PW1 5.80 usec  
IRNUC 1H  
CTEMP 22.6 c  
SLVNT CDCL3  
EXREF 77.00 ppm  
BF 2.00 Hz  
RGAIN 25

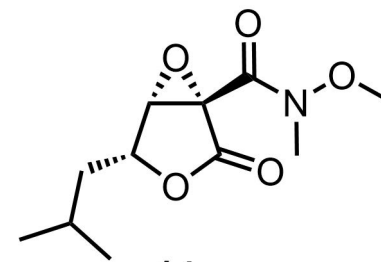

14

<sup>13</sup>C NMR

CDCl<sub>3</sub> (100 MHz)

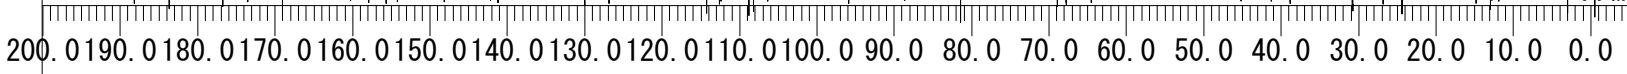

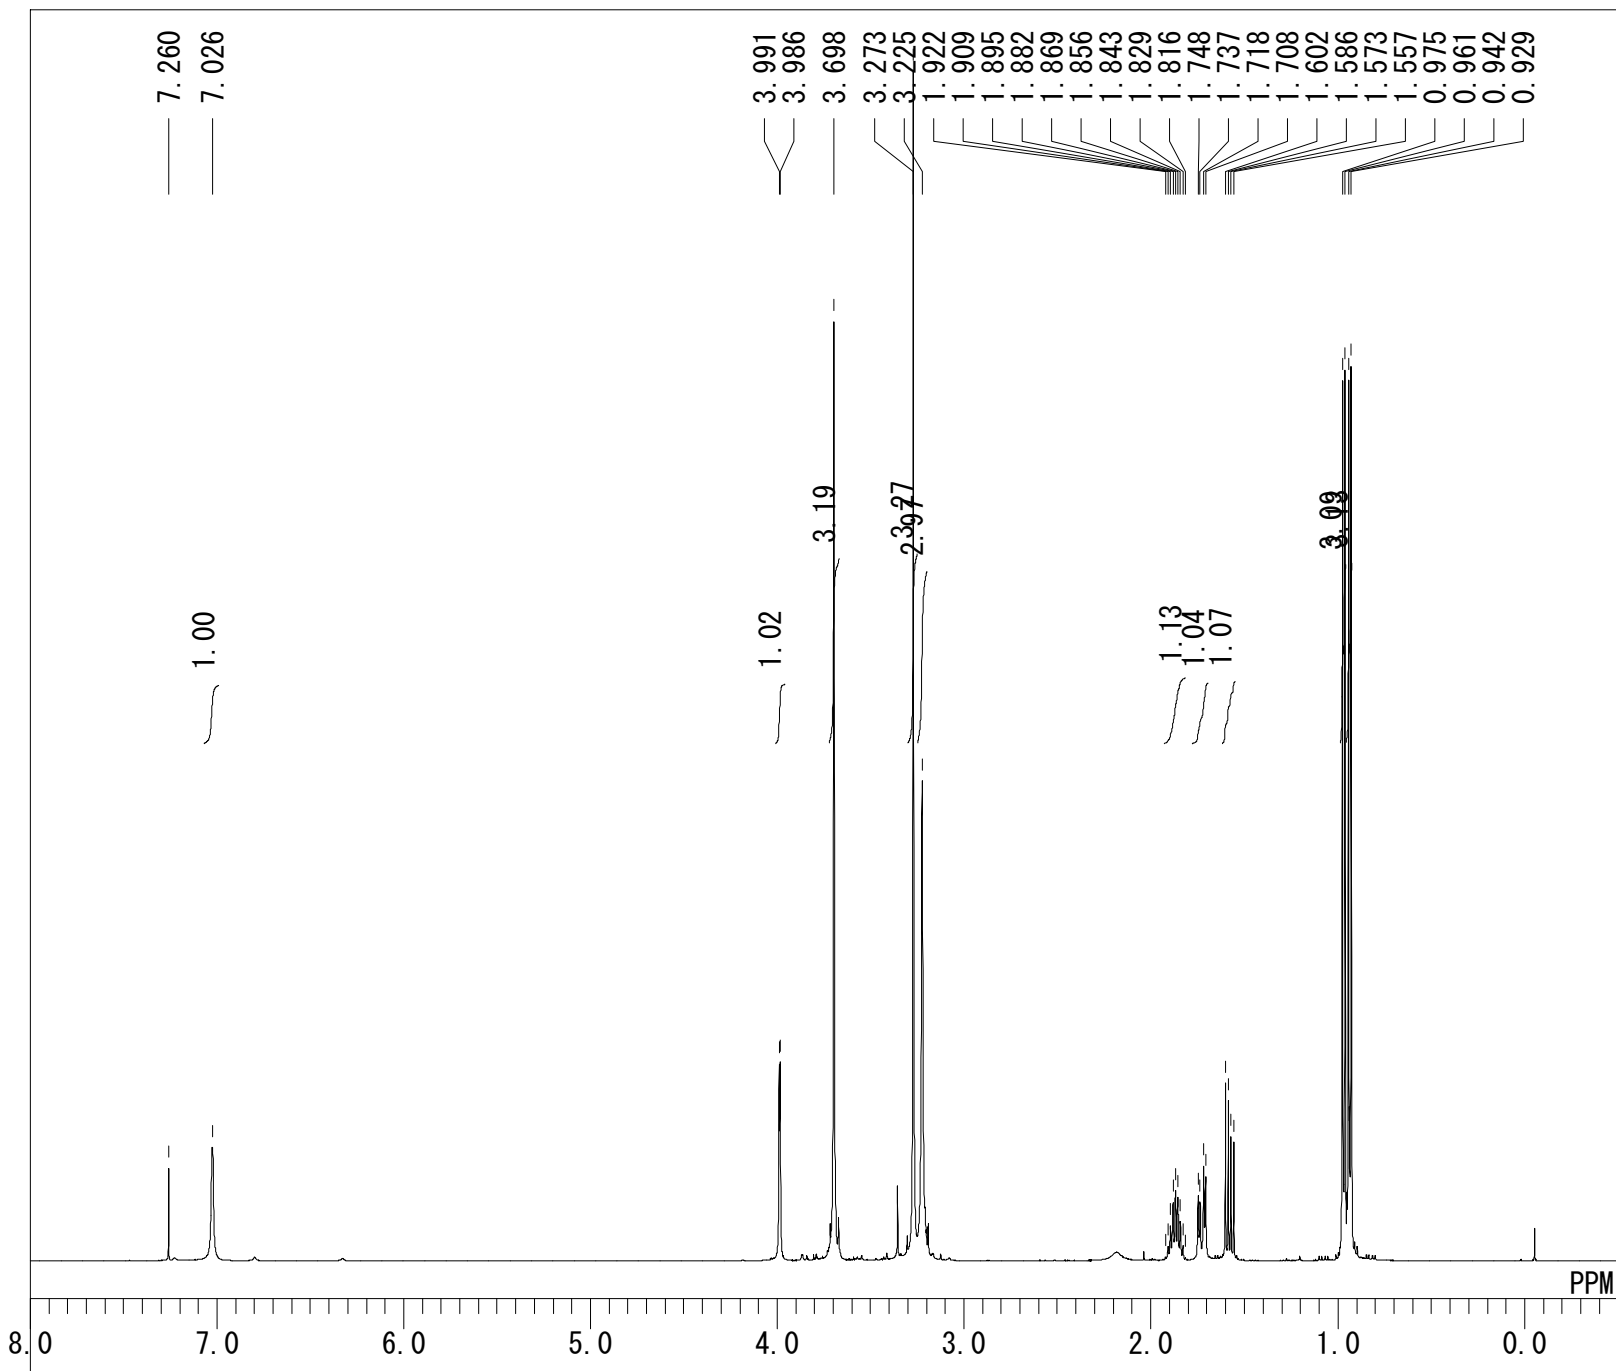

OBFRO 495.13 MHz  
 OBSET 4.38 KHz  
 OBFIN 9.64 Hz  
 POINT 26214  
 FREQU 7429.42 Hz  
 SCANS 16  
 ACQTM 3.5285 sec  
 PD 5.0000 sec  
 PW1 6.25 usec  
 IRNUC 1H  
 CTEMP 23.8 c  
 SLVNT CDCL3  
 EXREF 7.26 ppm  
 BF 0.09 Hz  
 RGAIN 24

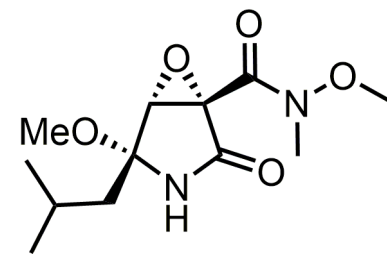

11

<sup>1</sup>H NMR

CDCl<sub>3</sub> (500 MHz)

169.319  
162.351

89.570  
77.385  
77.127  
76.868  
61.937  
61.363  
60.262  
49.839  
41.511  
32.237  
24.053  
23.862  
23.431  
0.000

OBFRQ 124.51 MHz  
OBSET 3.45 KHz  
OBFIN 6.00 Hz  
POINT 26224  
FREQ 31250.00 Hz  
SCANS 10000  
ACQTM 0.8389 sec  
PD 2.0000 sec  
PW1 3.42 usec  
IRNUC 1H  
CTEMP 23.9 c  
SLVNT CDCL3  
EXREF 0.00 ppm  
BF 0.09 Hz  
RGAIN 60

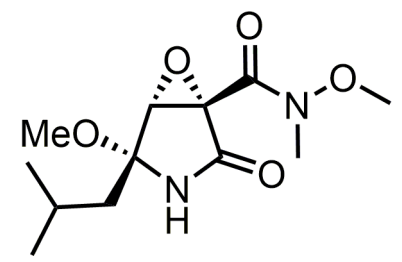

11

<sup>13</sup>C NMR

CDCl<sub>3</sub> (125 MHz)

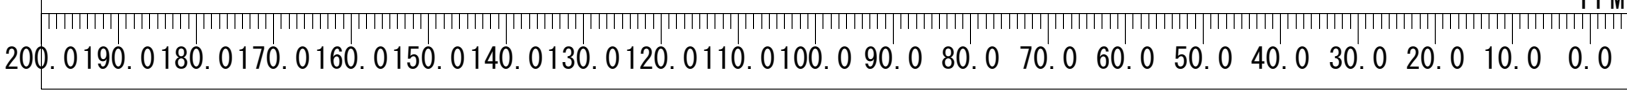

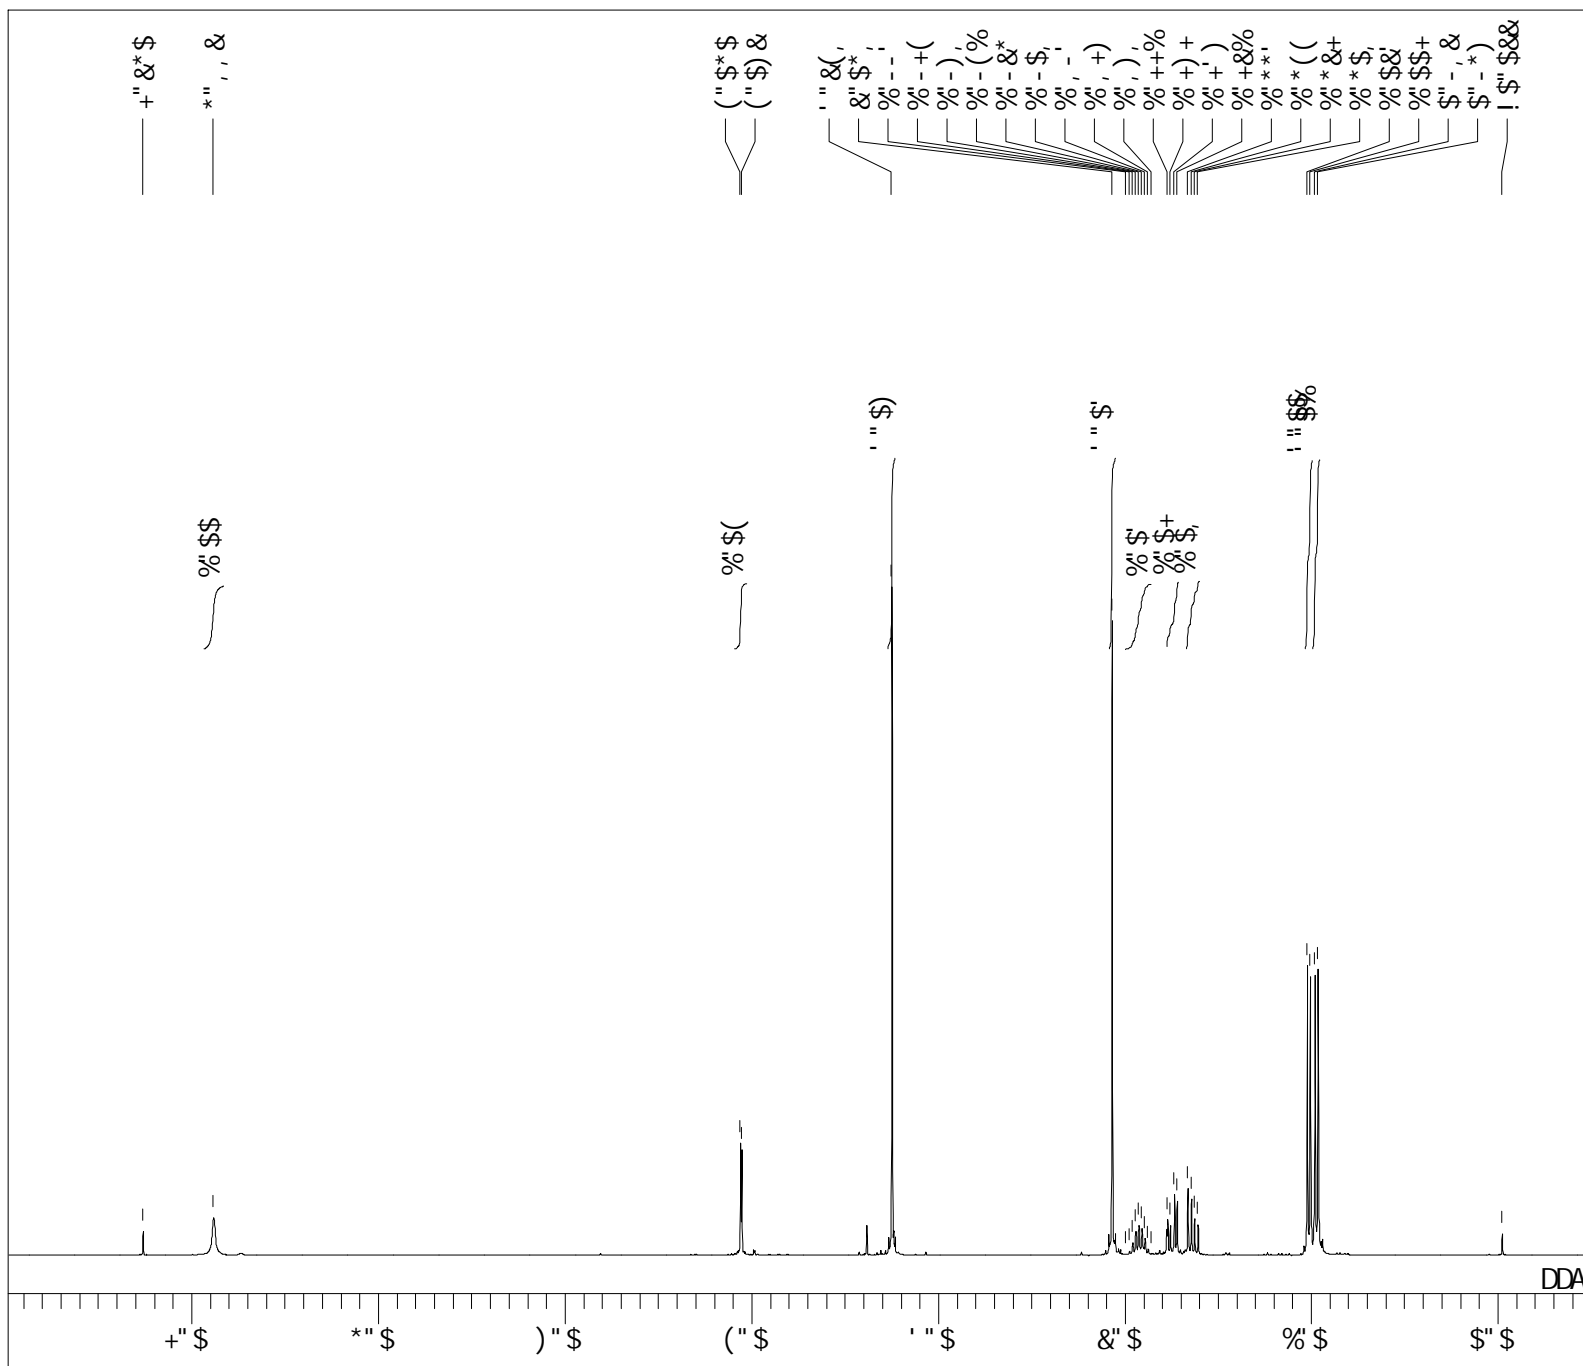

C6: FE ..... "\*) A<n  
 C6G9H ..... %(" \$\$ ?<n  
 C6: =B ..... %) \$\$ \$\$ <n  
 DC=BH ..... %' ( <n  
 : F9EI ..... +-&" \$% <n  
 G75BG .....  
 57EHA ..... &"\$) \$\$: gYW  
 D8 ..... ("-\$) \$\$: gYW  
 DK% ..... )" \*\$ \$: i gYW  
 =FBI 7 %<  
 7H9AD ..... &(" , W  
 G@|BH 787@  
 9LF9: ..... +"&\* dda  
 6: ..... \$"%& <n  
 F; 5=B ..... %<

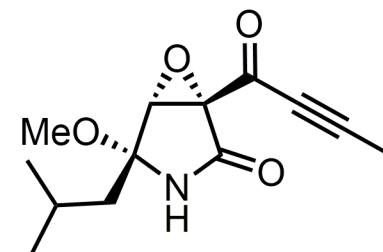

9

<sup>1</sup>H NMR  
CDCl<sub>3</sub> (400 MHz)

175.521  
167.724

96.289  
88.756  
77.552  
77.321  
77.000  
76.687  
63.745  
61.918  
49.602  
42.299  
24.031  
23.767  
23.487  
4.453

OBFRQ 100.40 MHz  
OBSET 125.00 KHz  
OBFIN 10500.00 Hz  
POINT 32768  
FREQ 27118.64 Hz  
SCANS 1000  
ACQTM 1.2083 sec  
PD 1.7920 sec  
PW1 5.80 usec  
IRNUC 1H  
CTEMP 25.3 c  
SLVNT CDCL3  
EXREF 77.00 ppm  
BF 1.20 Hz  
RGAIN 25

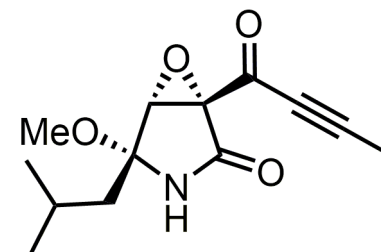

9

<sup>13</sup>C NMR

CDCl<sub>3</sub> (100 MHz)

PPM



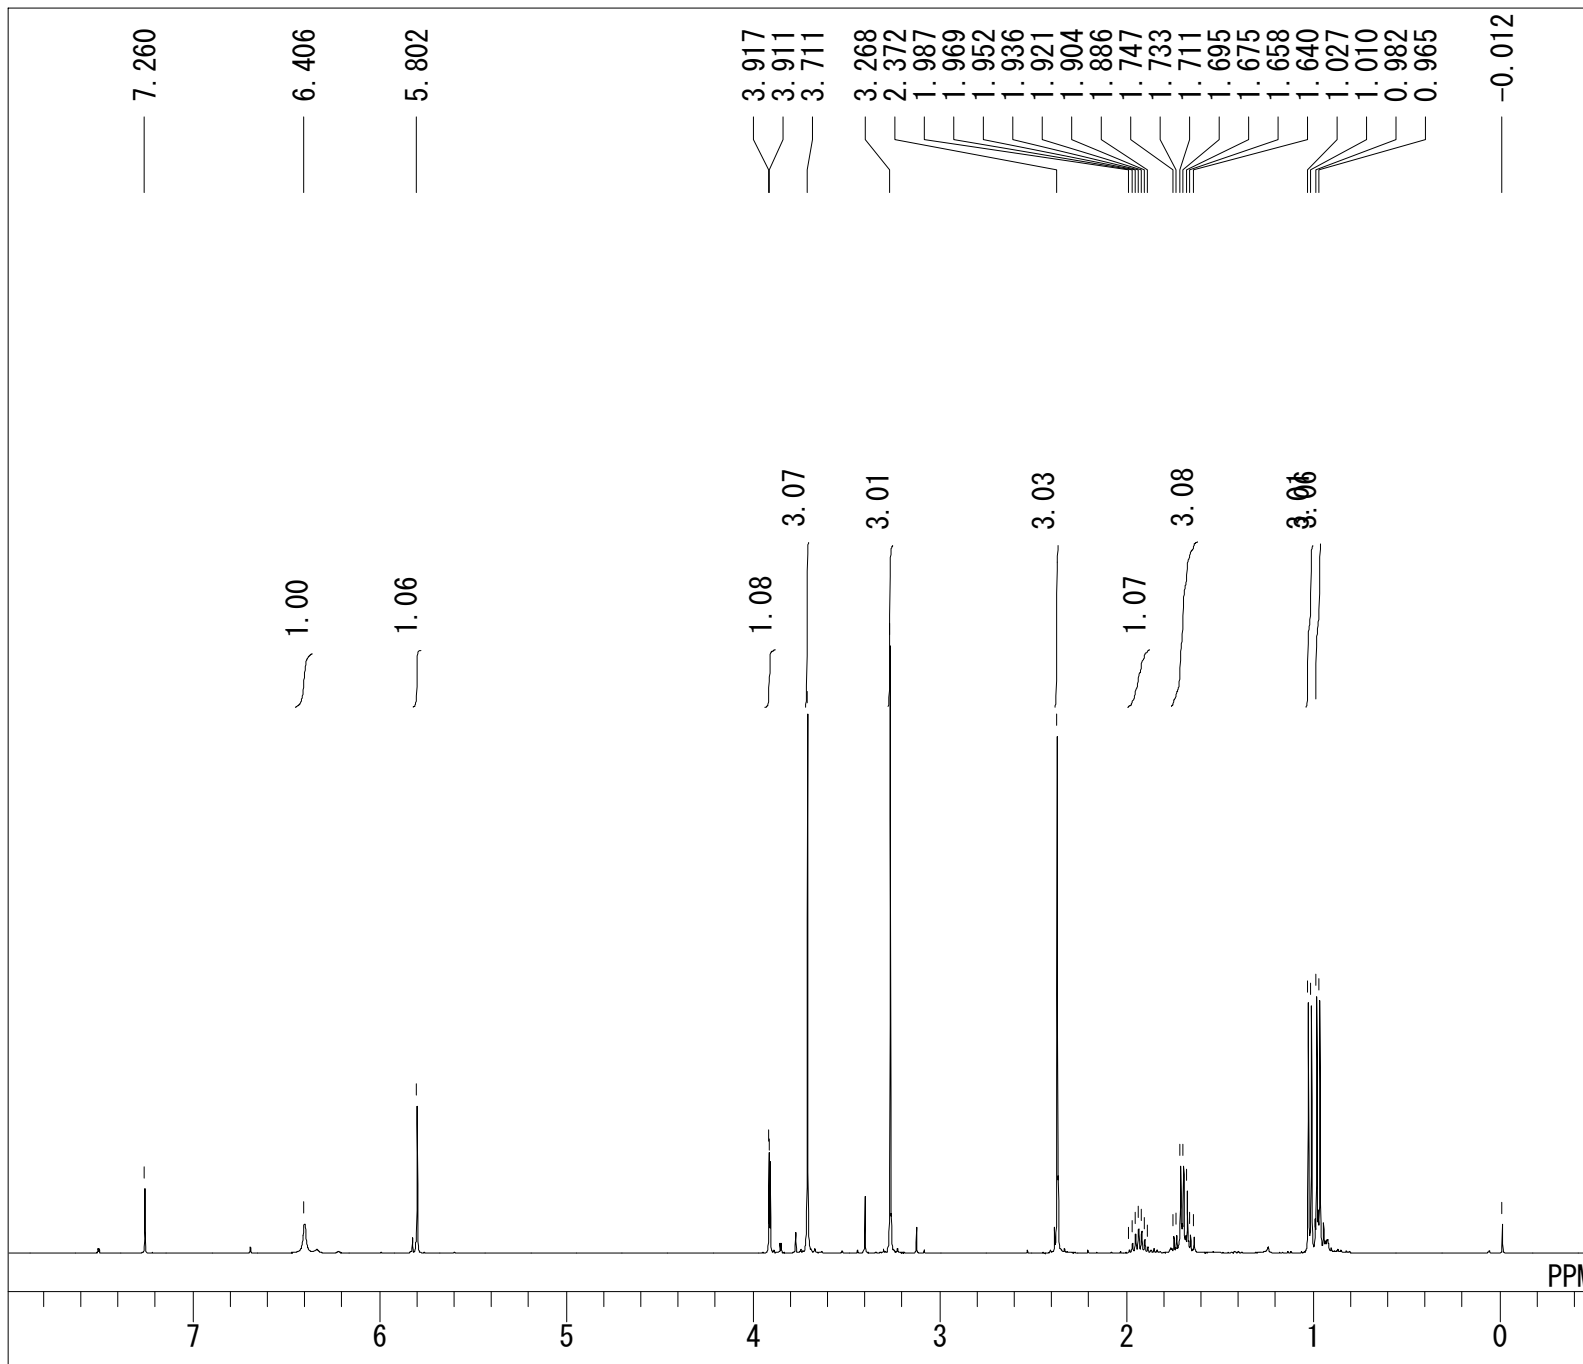

OBFRQ 399.65 MHz  
 OBSET 124.00 KHz  
 OBFIN 10500.00 Hz  
 POINT 16384  
 FREQU 7992.01 Hz  
 SCANS 8  
 ACQTM 2.0500 sec  
 PD 4.9500 sec  
 PW1 5.60 usec  
 IRNUC 1H  
 CTEMP 23.7 c  
 SLVNT CDCL3  
 EXREF 7.26 ppm  
 BF 0.12 Hz  
 RGAIN 16

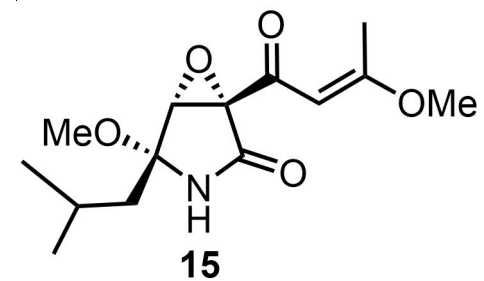

<sup>1</sup>H NMR  
 CDCl<sub>3</sub> (400 MHz)

186.536  
178.032  
169.626

94.478  
88.707  
77.321  
77.000  
76.679  
63.367  
61.728  
56.105  
49.651  
42.768

24.064  
23.866  
23.545  
20.664

OBFRQ 100.40 MHz  
OBSET 125.00 KHz  
OBFIN 10500.00 Hz  
POINT 32768  
FREQ 27118.64 Hz  
SCANS 2000  
ACQTM 1.2083 sec  
PD 1.7920 sec  
PW1 5.80 usec  
IRNUC 1H  
CTEMP 24.4 c  
SLVNT CDCL3  
EXREF 77.00 ppm  
BF 0.12 Hz  
RGAIN 25

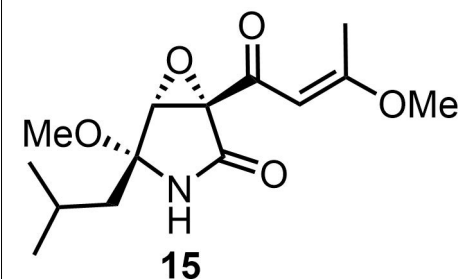

<sup>13</sup>C NMR  
CDCl<sub>3</sub> (100 MHz)

200.0 190.0 180.0 170.0 160.0 150.0 140.0 130.0 120.0 110.0 100.0 90.0 80.0 70.0 60.0 50.0 40.0 30.0 20.0 10.0 0.0

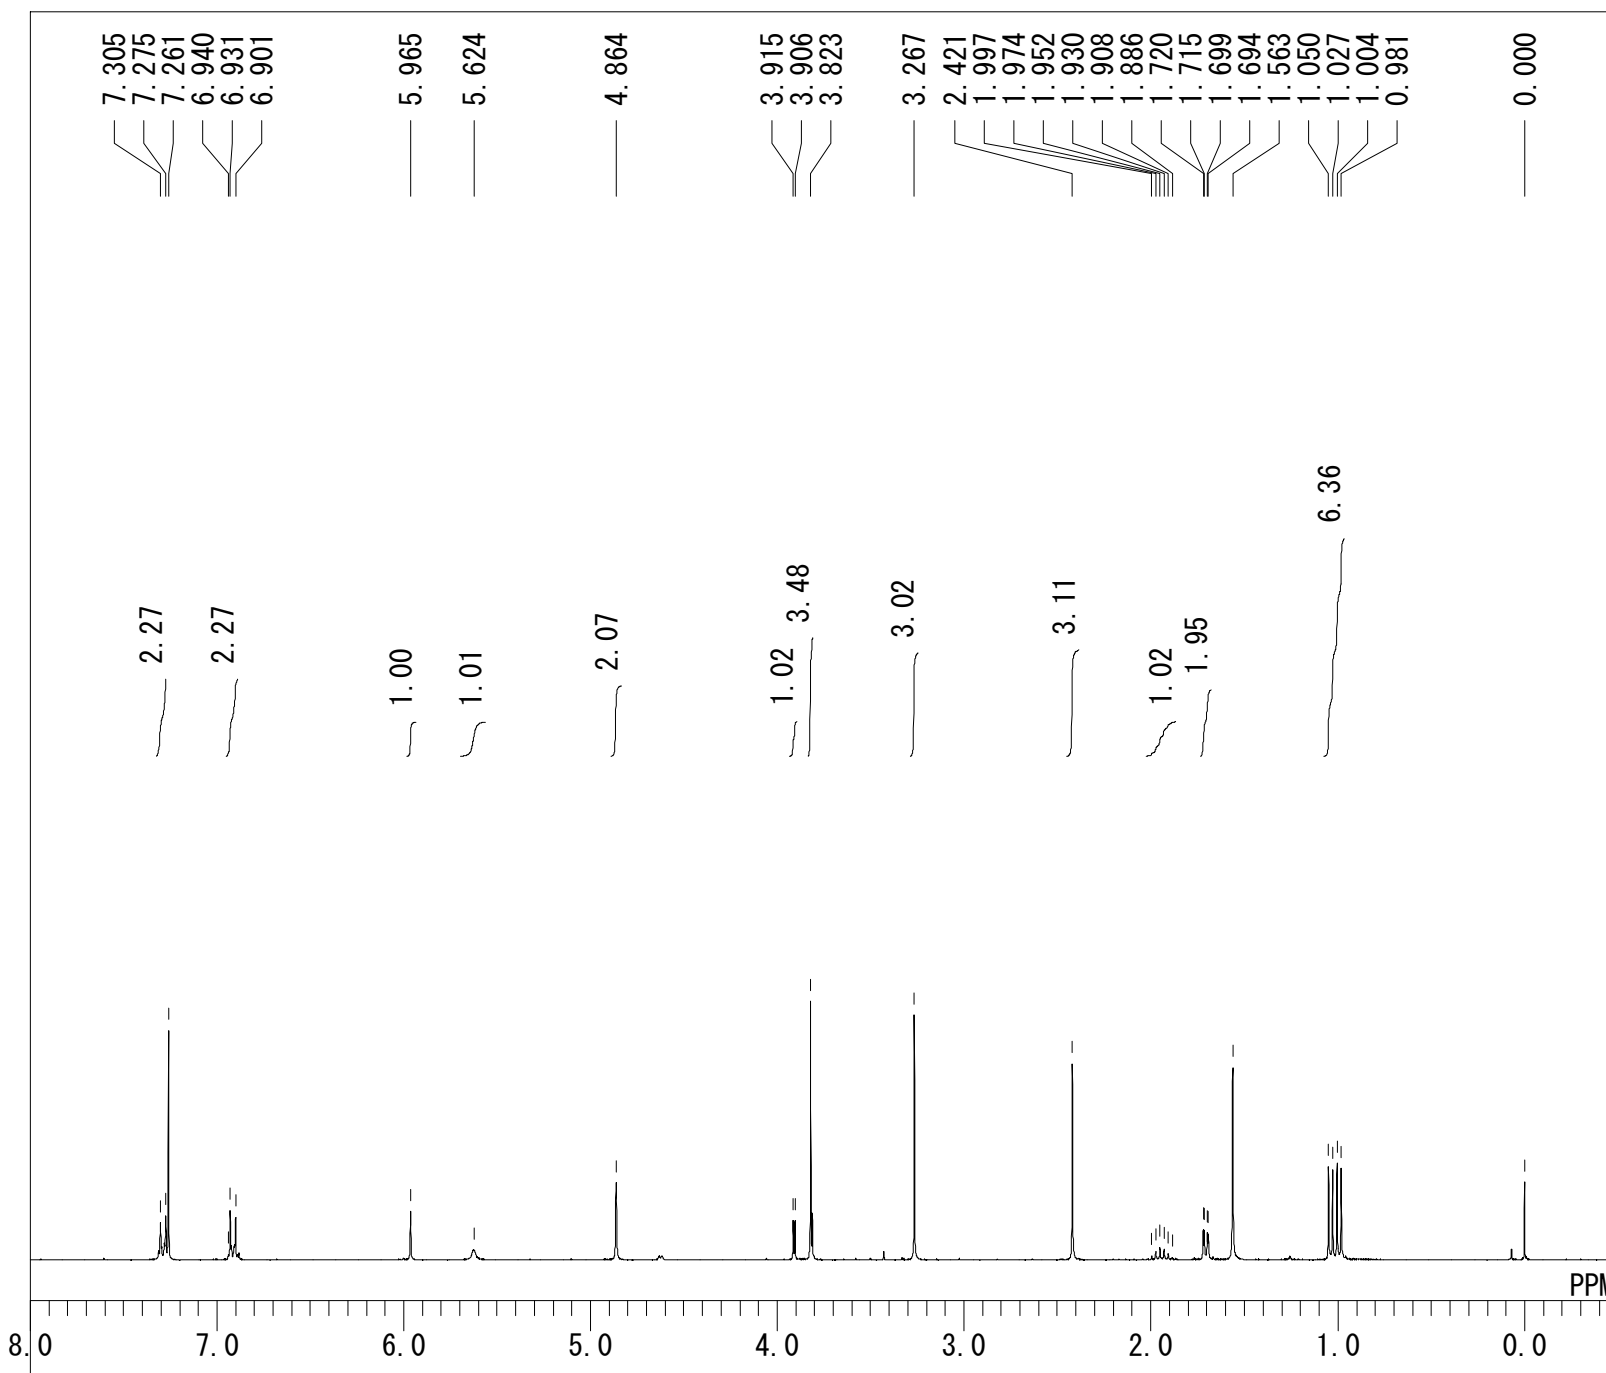

OBFREQ 300.40 MHz  
 OBSET 130.00 KHz  
 OBFIN 1150.00 Hz  
 POINT 32768  
 FREQU 6006.01 Hz  
 SCANS 16  
 ACQTM 5.4559 sec  
 PD 1.5440 sec  
 PW1 5.30 usec  
 IRNUC 1H  
 CTEMP 26.2 c  
 SLVNT CDCL3  
 EXREF 0.00 ppm  
 BF 0.09 Hz  
 RGAIN 21

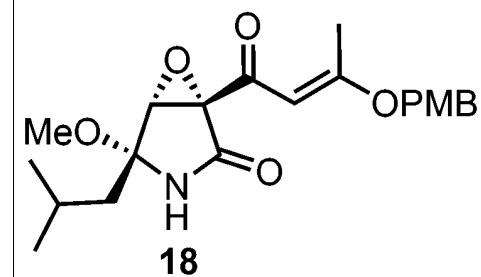

<sup>1</sup>H NMR  
 CDCl<sub>3</sub> (300 MHz)

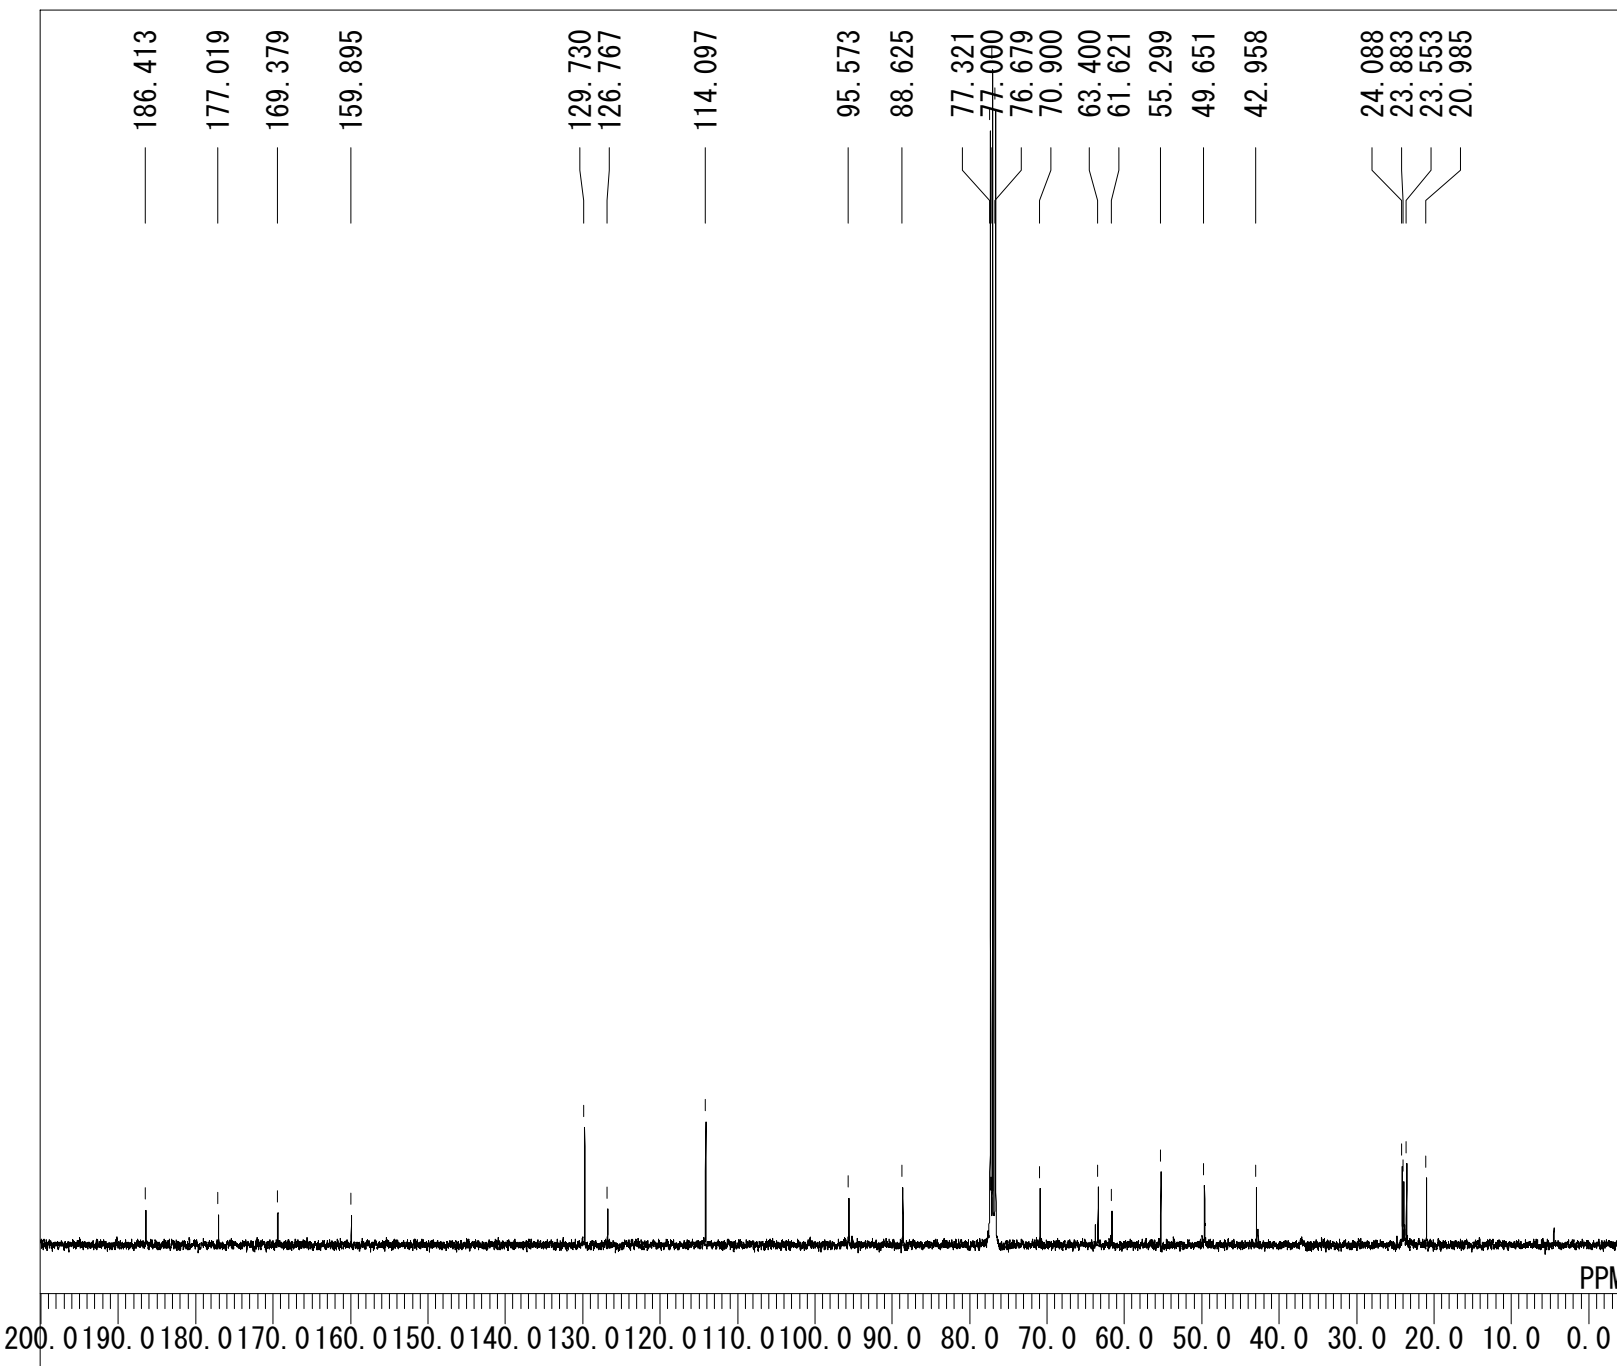

OBFRQ 100.40 MHz  
 OBSET 125.00 KHz  
 OBFIN 10500.00 Hz  
 POINT 32768  
 FREQU 27118.64 Hz  
 SCANS 1500  
 ACQTM 1.2083 sec  
 PD 1.7920 sec  
 PW1 5.80 usec  
 IRNUC 1H  
 CTEMP 23.5 c  
 SLVNT CDCL3  
 EXREF 77.00 ppm  
 BF 2.00 Hz  
 RGAIN 25

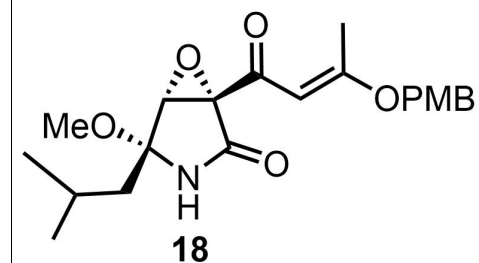

<sup>13</sup>C NMR  
 CDCl<sub>3</sub> (100 MHz)

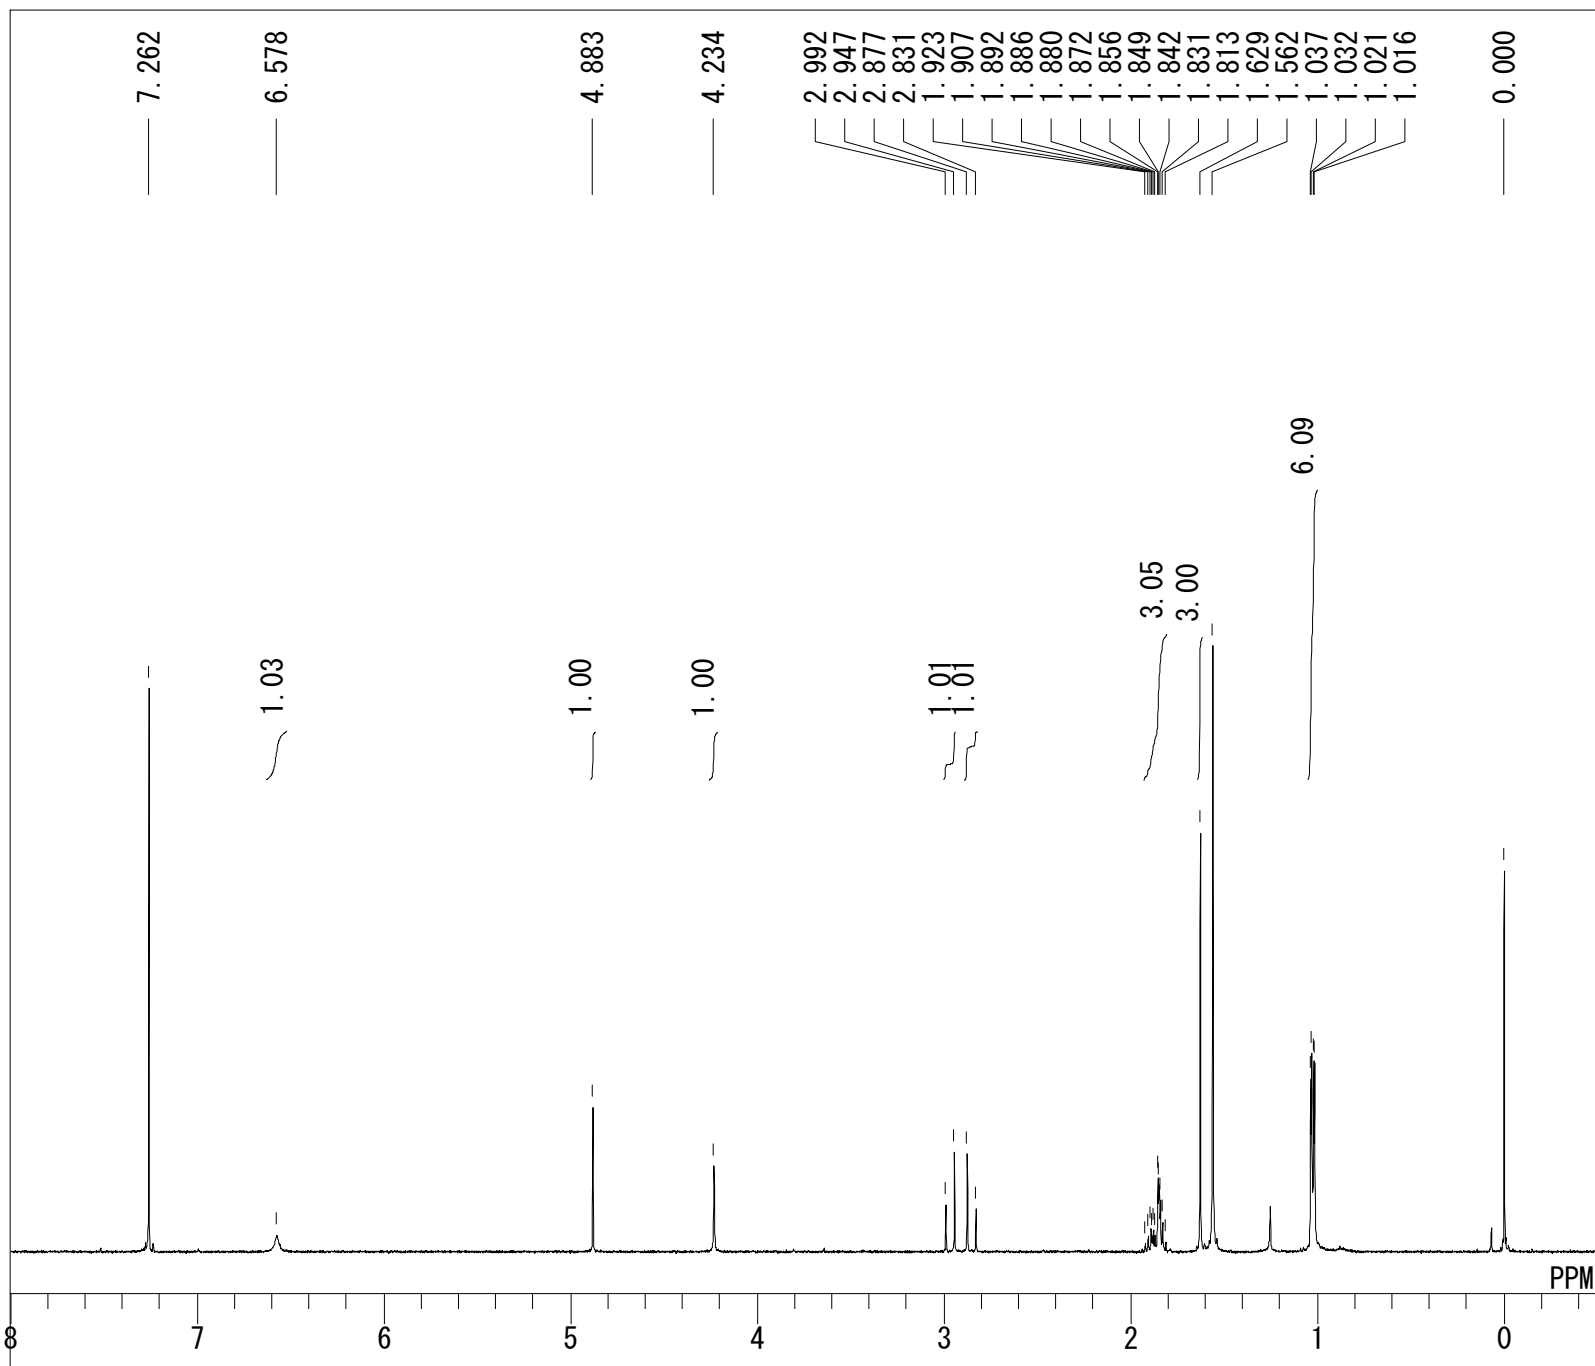

OBFRQ 399.65 MHz  
 OBSET 124.00 KHz  
 OBFIN 10500.00 Hz  
 POINT 16384  
 FREQU 7992.01 Hz  
 SCANS 8  
 ACQTM 2.0500 sec  
 PD 4.9500 sec  
 PW1 5.60 usec  
 IRNUC 1H  
 CTEMP 23.6 c  
 SLVNT CDCL3  
 EXREF 0.00 ppm  
 BF 0.12 Hz  
 RGAIN 23

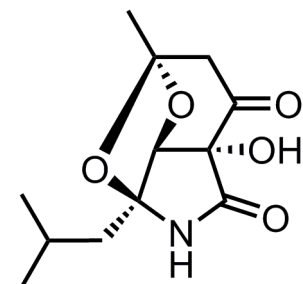

Rubrobramide (1)

<sup>1</sup>H NMR

CDCl<sub>3</sub> (400 MHz)

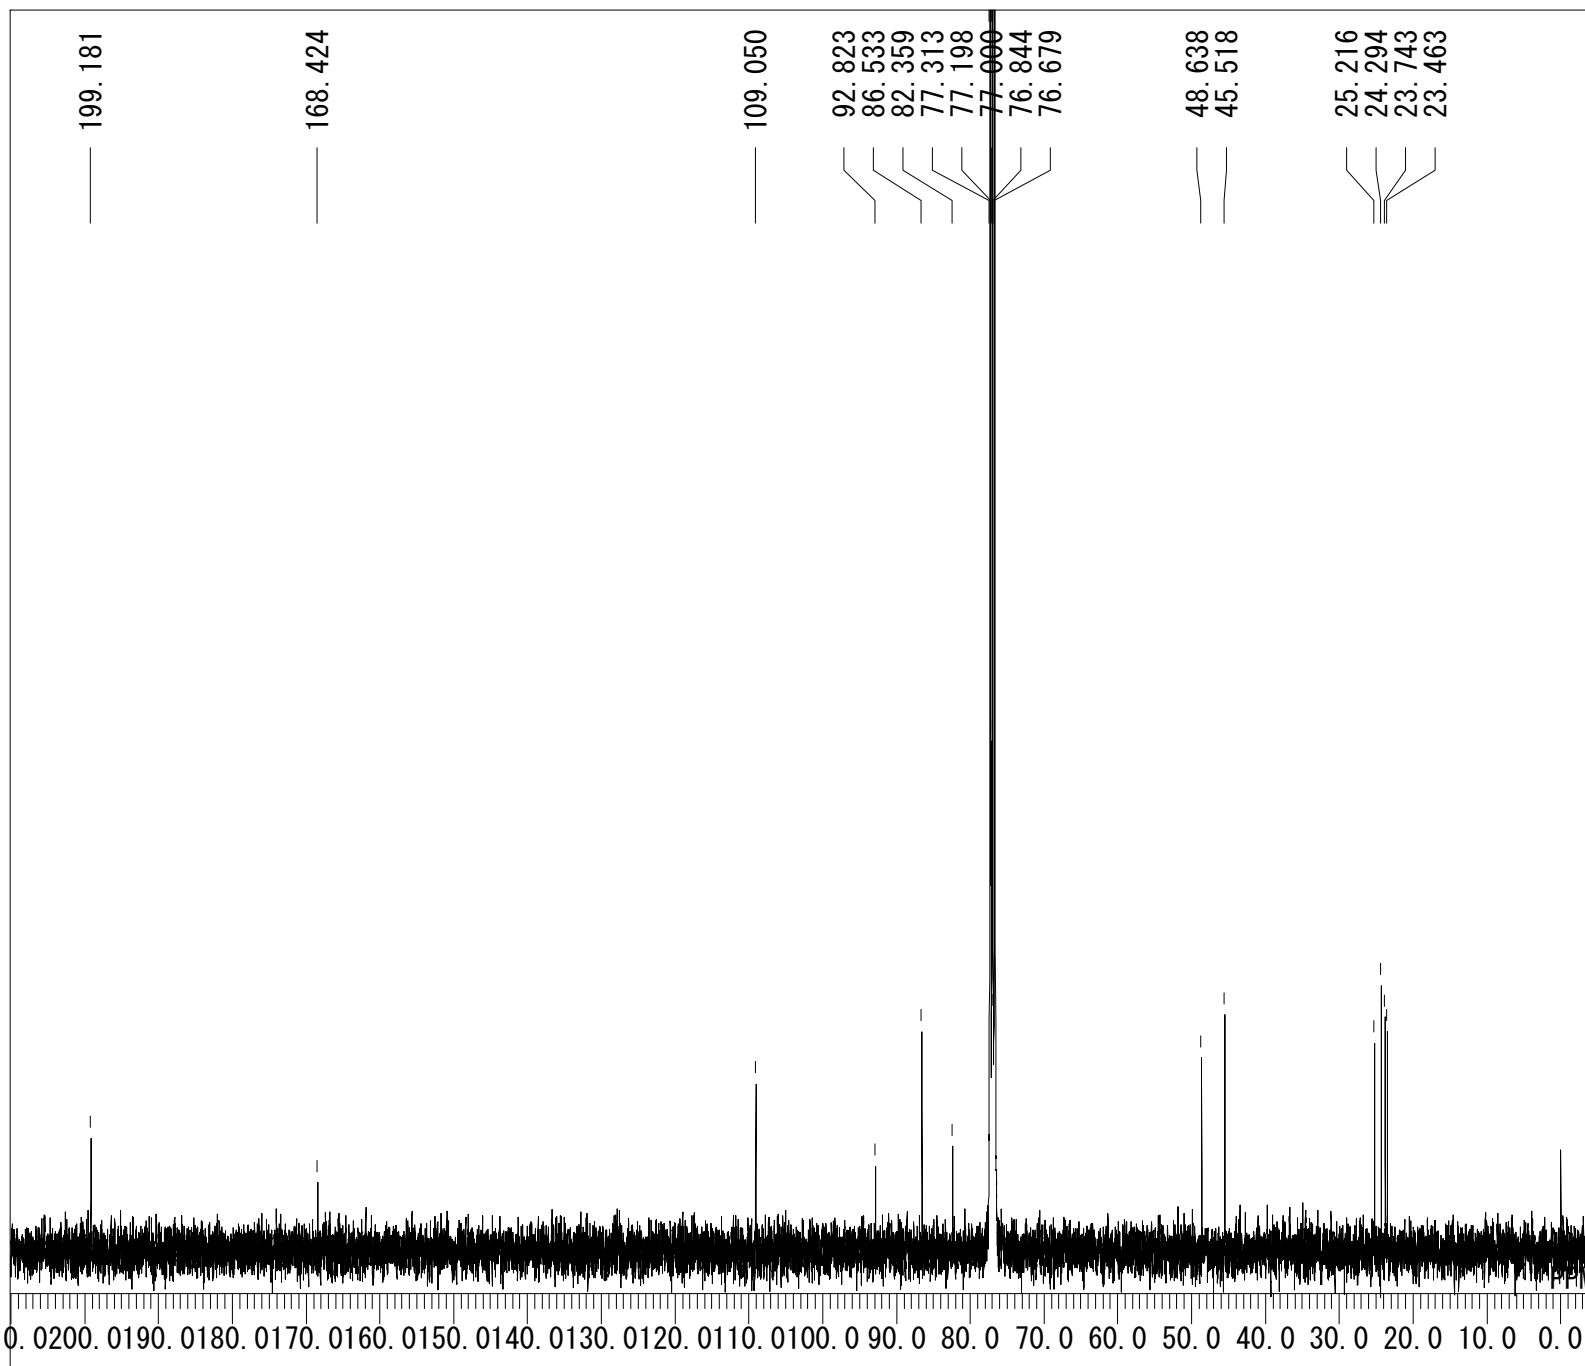

OBFRQ 100.40 MHz  
 OBSET 125.00 KHz  
 OBFIN 10500.00 Hz  
 POINT 32768  
 FREQU 27118.64 Hz  
 SCANS 5000  
 ACQTM 1.2083 sec  
 PD 1.7920 sec  
 PW1 5.80 usec  
 IRNUC 1H  
 CTEMP 24.1 c  
 SLVNT CDCL3  
 EXREF 77.00 ppm  
 BF 1.20 Hz  
 RGAIN 25

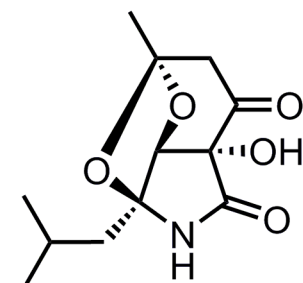

Rubrobramide (1)

<sup>13</sup>C NMR

CDCl<sub>3</sub> (100 MHz)

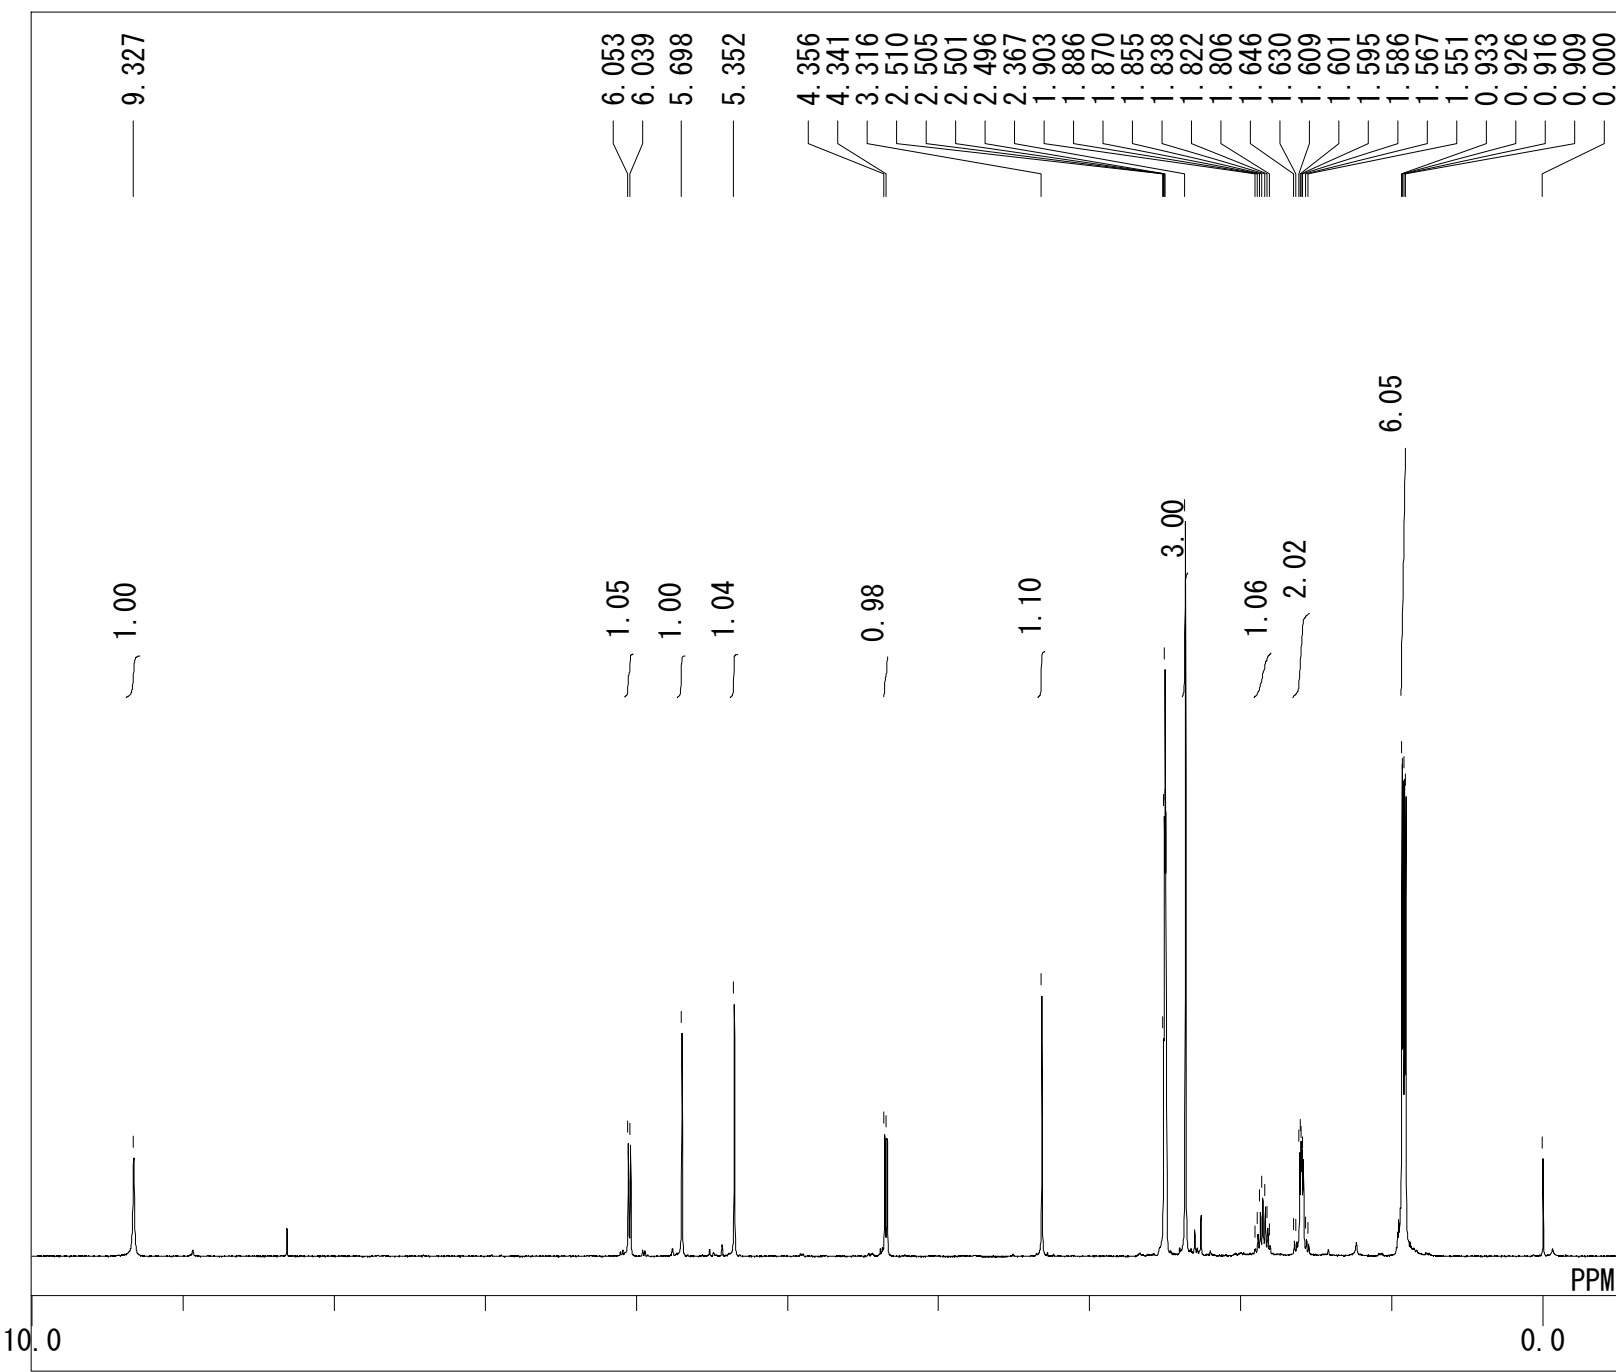

OBFREQ 399.65 MHz  
 OBSET 124.00 KHz  
 OBFIN 10500.00 Hz  
 POINT 16384  
 FREQU 7992.01 Hz  
 SCANS 8  
 ACQTM 2.0500 sec  
 PD 4.9500 sec  
 PW1 5.80 usec  
 IRNUC 1H  
 CTEMP 24.2 c  
 SLVNT DMSO  
 EXREF 0.00 ppm  
 BF 0.12 Hz  
 RGAIN 19

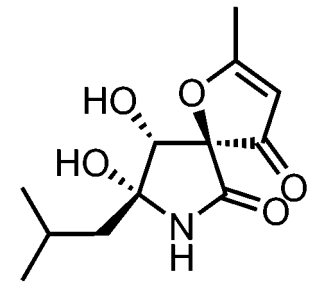

**16**  
<sup>1</sup>H NMR  
 DMSO-*d*<sub>6</sub> (400 MHz)

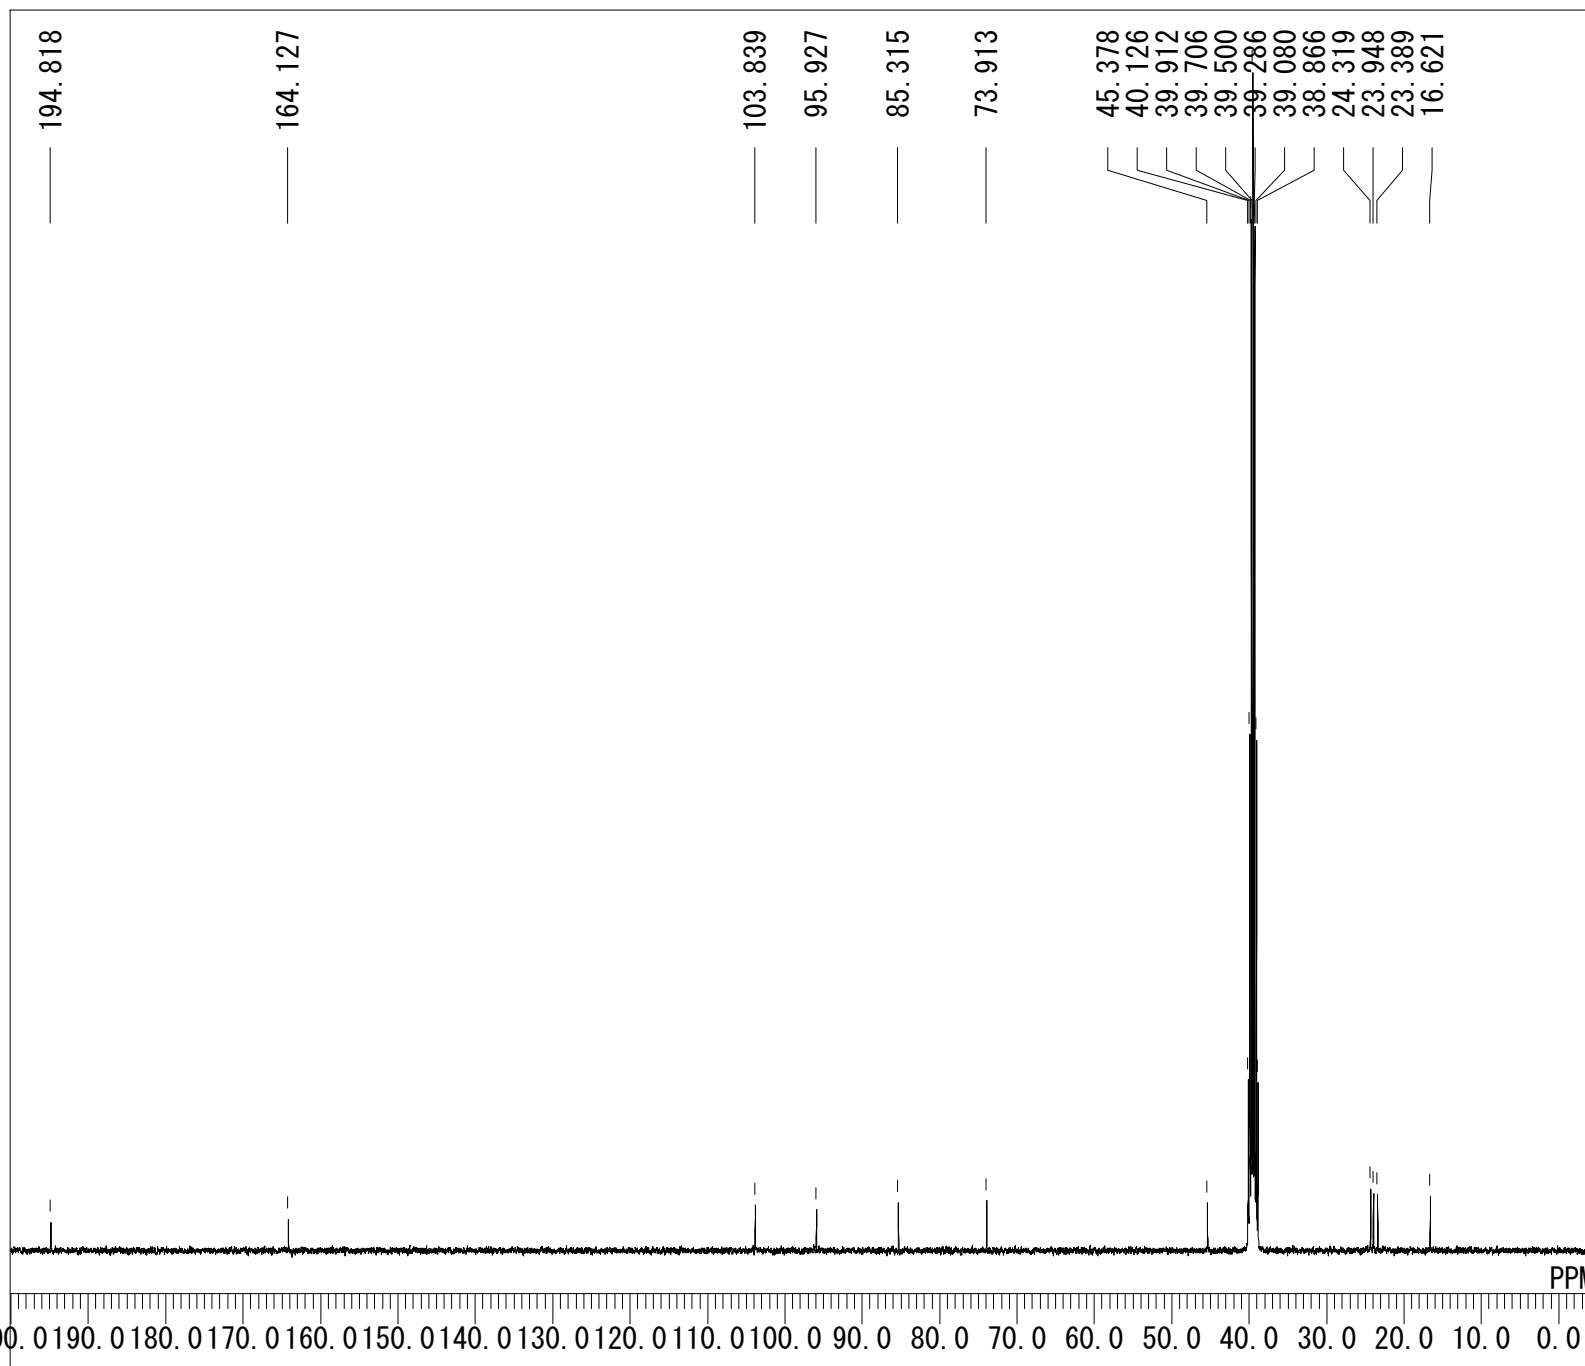

OBFREQ 100.40 MHz  
 OBSET 125.00 KHz  
 OBFIN 10500.00 Hz  
 POINT 32768  
 FREQU 27118.64 Hz  
 SCANS 995  
 ACQTM 1.2083 sec  
 PD 1.7920 sec  
 PW1 5.80 usec  
 IRNUC 1H  
 CTEMP 24.2 c  
 SLVNT DMSO  
 EXREF 39.50 ppm  
 BF 2.00 Hz  
 RGAIN 24

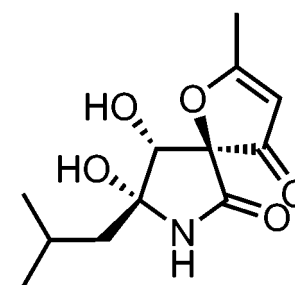

**16**

<sup>13</sup>C NMR

DMSO-*d*<sub>6</sub> (100 MHz)



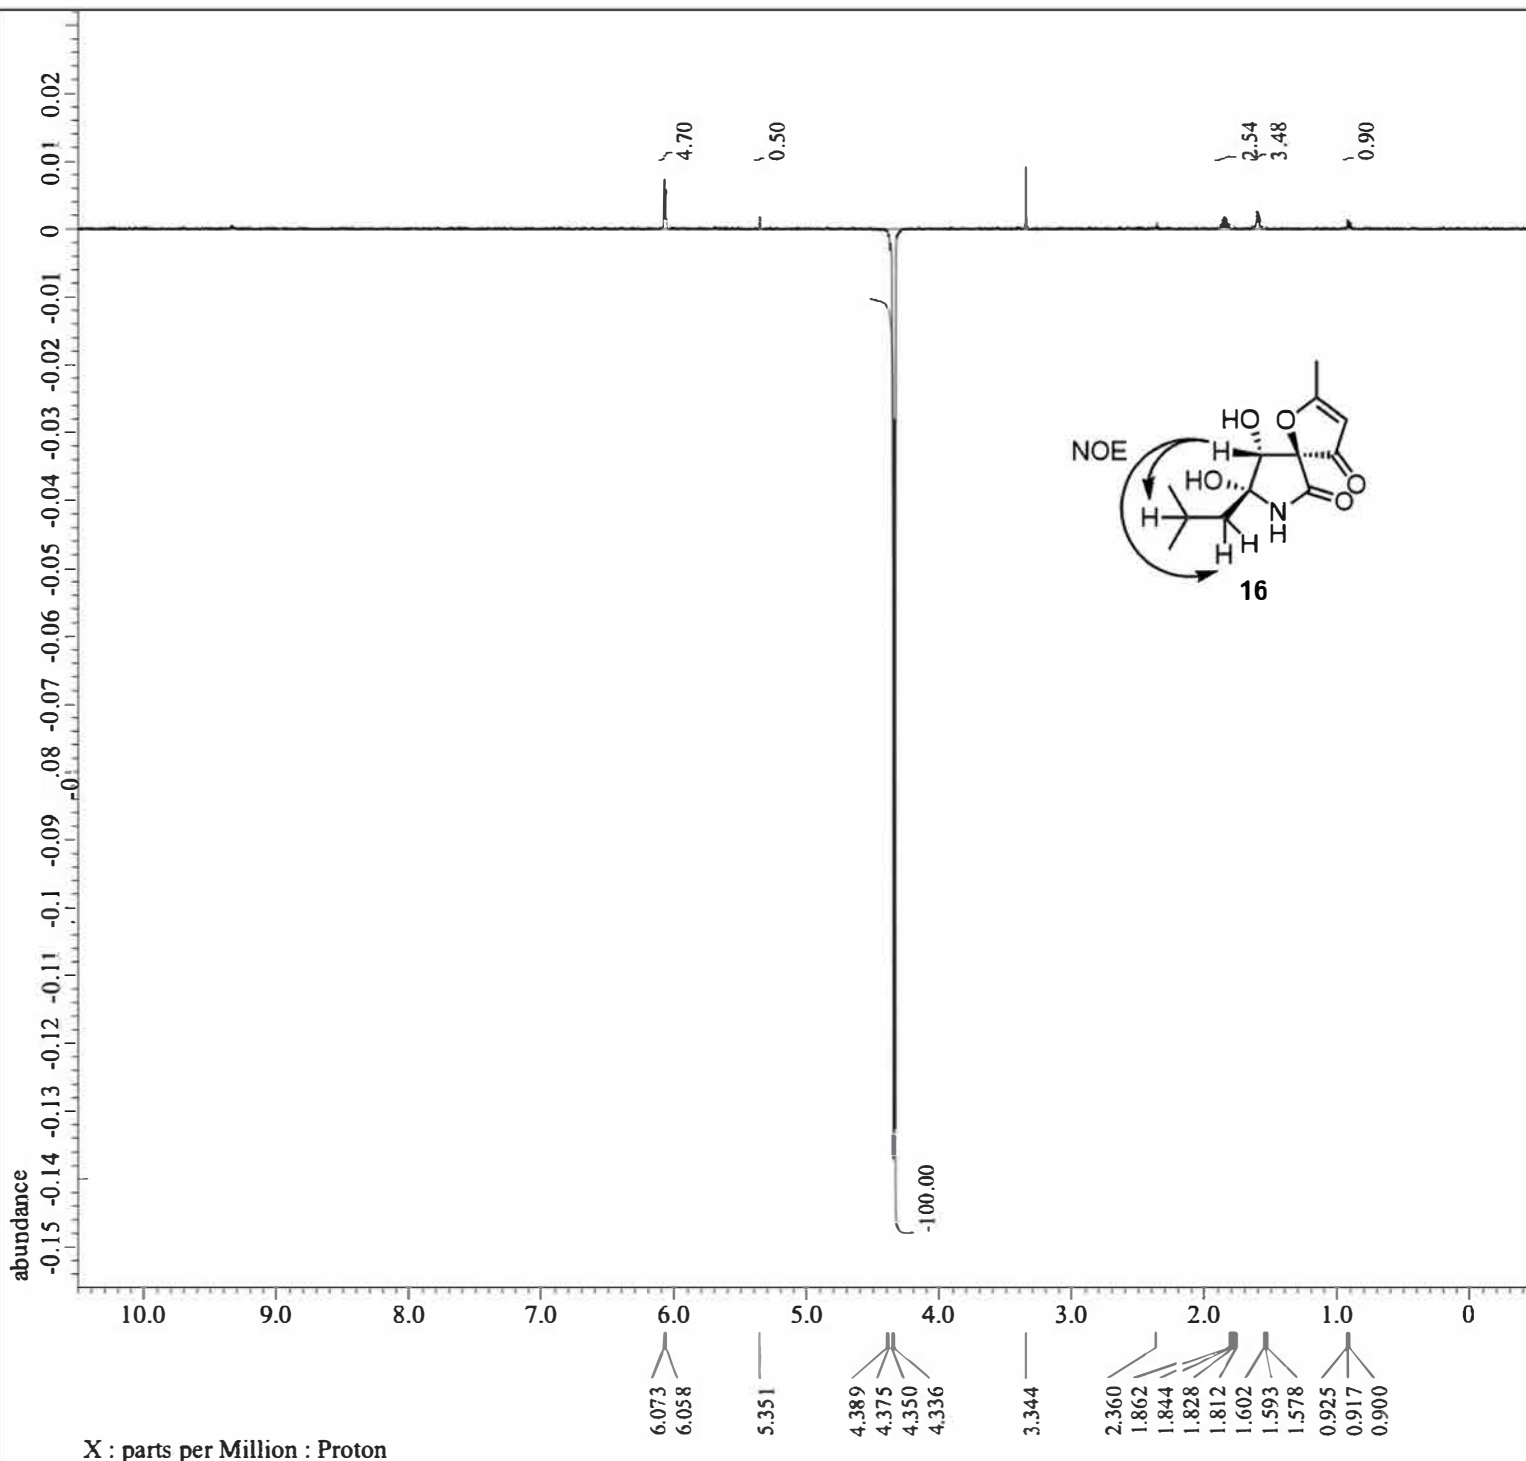

Filename = KST-Me-berkeleyamideD  
 Author = delta  
 Experiment = noe\_id\_dpfgse.jxp  
 Sample Id = KST-Me-berkeleyamideD  
 Solvent = DMSO-D6  
 Creation\_Time = 24-AUG-2021 19:55:42  
 Revision\_Time = 27-AUG-2021 10:30:55  
 Current\_Time = 27-AUG-2021 10:31:47

Comment = DPGSE NOE 1D  
 Data\_Format = 1D COMPLEX  
 Dim\_Size = 13107  
 Dim\_Title = Proton  
 Dim\_Units = [ppm]  
 Dimensions = X  
 Spectrometer = JNM-ECZ400S/L1

Field\_Strength = 9.389766 [T] (400 [MHz])  
 X\_Acq\_Duration = 2.18628096 [s]  
 X\_Domain = 1H  
 X\_Freq = 399.78219838 [MHz]  
 X\_Offset = 5 [ppm]  
 X\_Points = 16384  
 X\_Prescans = 2  
 X\_Resolution = 0.45739775 [Hz]  
 X\_Sweep = 7.4940048 [kHz]  
 X\_Sweep\_Clippped = 5.99520384 [kHz]  
 Irr\_Domain = Proton  
 Irr\_Freq = 399.78219838 [MHz]  
 Irr\_Offset = 5 [ppm]  
 Tri\_Domain = Proton  
 Tri\_Freq = 399.78219838 [MHz]  
 Tri\_Offset = 5 [ppm]  
 Blanking = 2 [us]  
 Clipped = FALSE  
 Decimation\_Reg = r: 834 ( 833 ), g: 49  
 Scans = 16  
 Total\_Scans = 16

Relaxation\_Delay = 7 [s]  
 Recvr\_Gain = 50  
 Temp\_Get = 21.4 [dC]  
 Mix\_Time = 0.5 [s]  
 X\_Acq\_Time = 2.18628096 [s]  
 X\_Atn = 2.4 [dB]  
 X\_Pulse = 6.15 [us]  
 Irr\_Mode = Off  
 Obs\_Sel\_180 = 40 [ms]  
 Obs\_Sel\_Atn = 64.932 [dB]  
 Obs\_Sel\_Offset = 4.3373704 [ppm]  
 Obs\_Sel\_Shape = GAUSS  
 Obs\_Sel\_Slp = 4.3373704 [ppm]  
 Tri\_Mode = Off  
 Comment\_1 = \*\*\* Pulse \*\*\*  
 Comment\_11 = \*\*\* NOESY mixing time \*\*\*  
 Comment\_111 = \*\*\* presat\_time \*\*\*  
 Comment\_201 = \*\*\* obs\_dante\_presatu \*\*\*  
 Comment\_202 = \*\*\* irr\_preaturation \*\*\*  
 Comment\_203 = \*\*\* tri\_preaturation \*\*\*  
 Comment\_32 = \*\*\* Selective 180deg \*\*\*  
 Comment\_7 = \*\*\* Pulse Delay \*\*\*  
 Comment\_8 = \*\*\* Pulse Field Gradi \*\*\*  
 Comment\_900 = \*\*\* lock hold \*\*\*  
 Dante\_Loop = 699

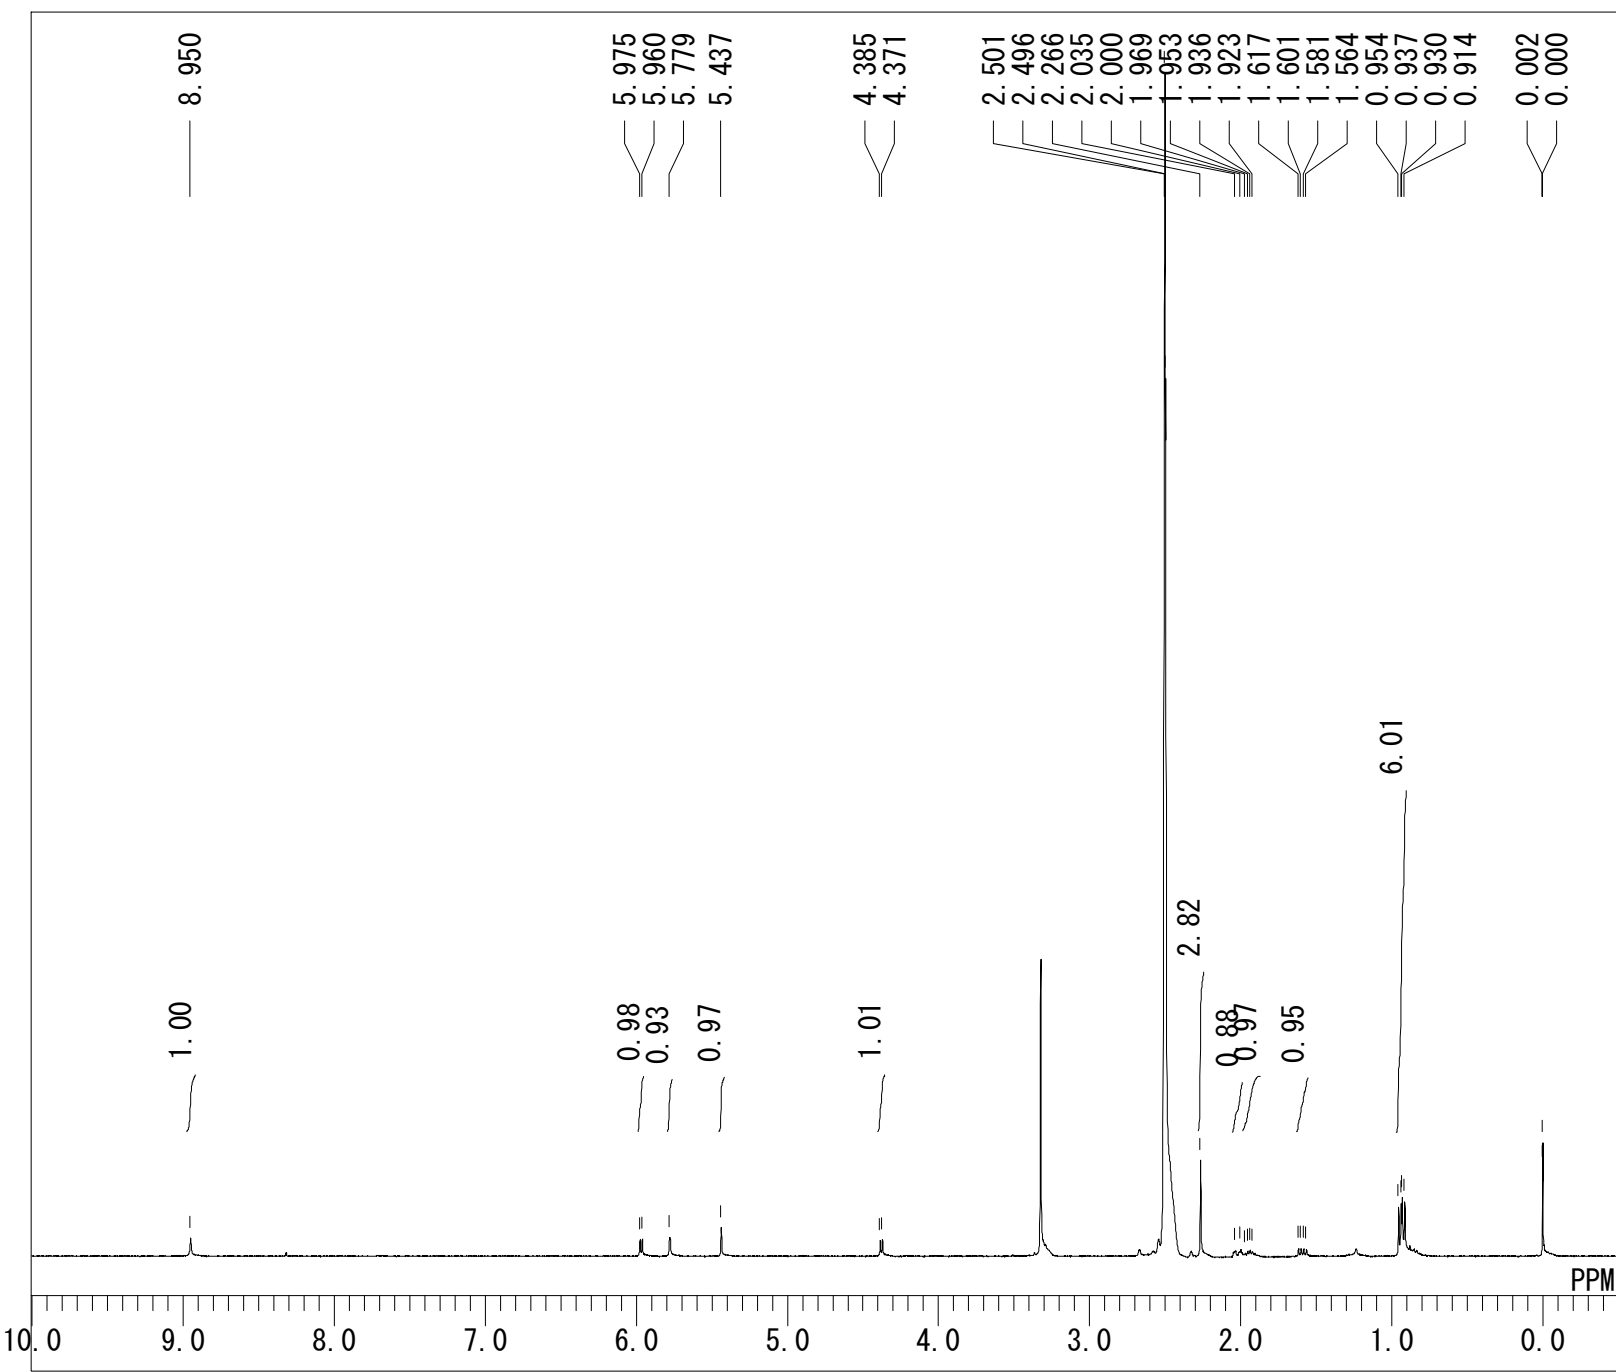

OBFRQ 399.65 MHz  
 OBSET 124.00 KHz  
 OBFIN 10500.00 Hz  
 POINT 16384  
 FREQU 7992.01 Hz  
 SCANS 32  
 ACQTM 2.0500 sec  
 PD 4.9500 sec  
 PW1 5.80 usec  
 IRNUC 1H  
 CTEMP 22.7 c  
 SLVNT DMSO  
 EXREF 0.00 ppm  
 BF 0.12 Hz  
 RGAIN 21

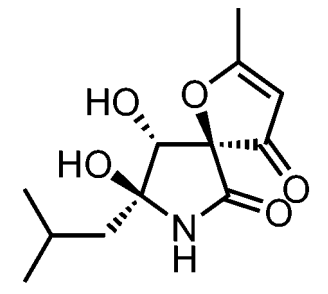

**17**  
<sup>1</sup>H NMR  
 DMSO-d<sub>6</sub> (400 MHz)

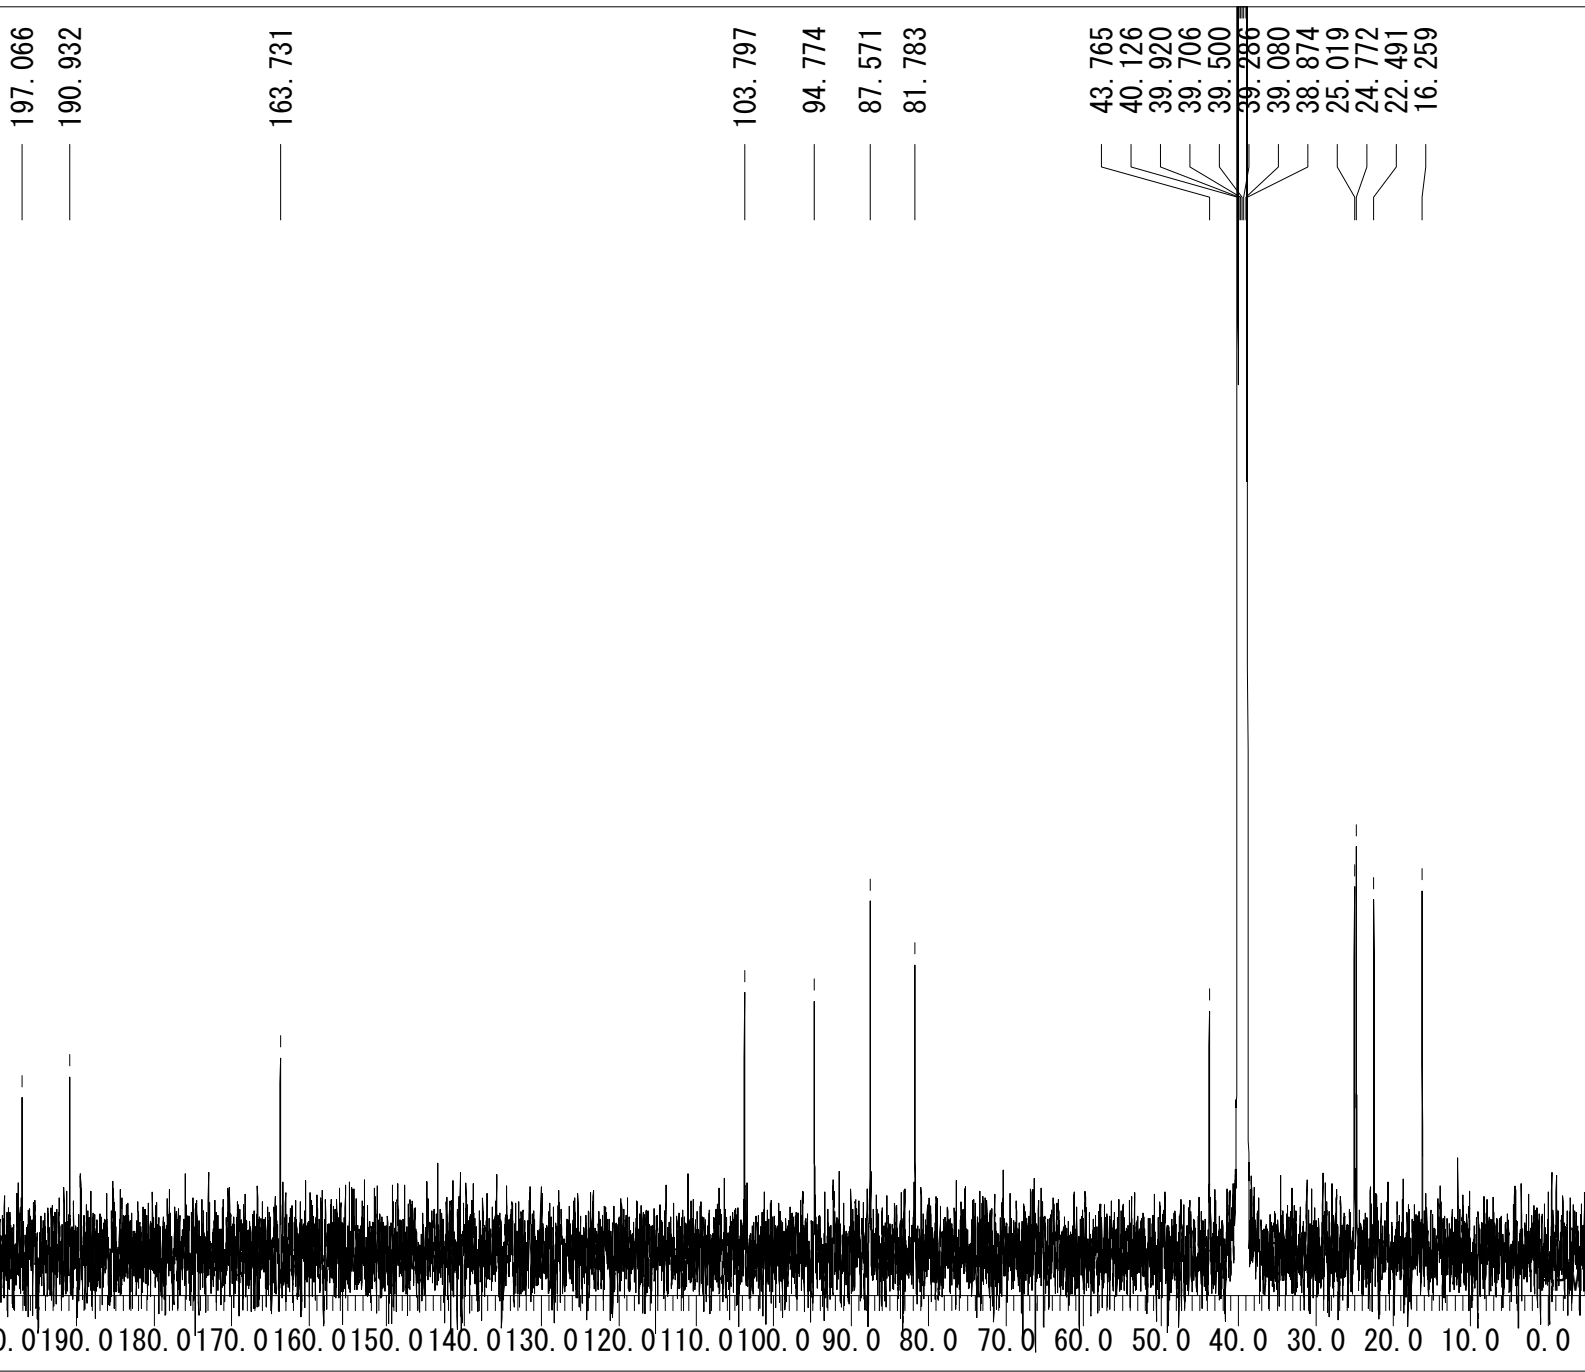

OBFRQ 100.40 MHz  
 OBSET 125.00 KHz  
 OBFIN 10500.00 Hz  
 POINT 32768  
 FREQU 27118.64 Hz  
 SCANS 2000  
 ACQTM 1.2083 sec  
 PD 1.7920 sec  
 PW1 5.80 usec  
 IRNUC 1H  
 CTEMP 23.4 c  
 SLVNT DMSO  
 EXREF 39.50 ppm  
 BF 2.00 Hz  
 RGAIN 24

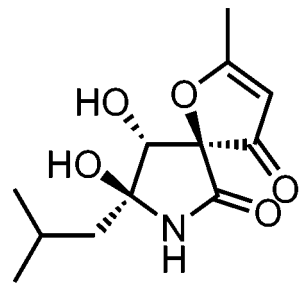

**17**  
<sup>13</sup>C NMR  
 DMSO-d<sub>6</sub> (100 MHz)

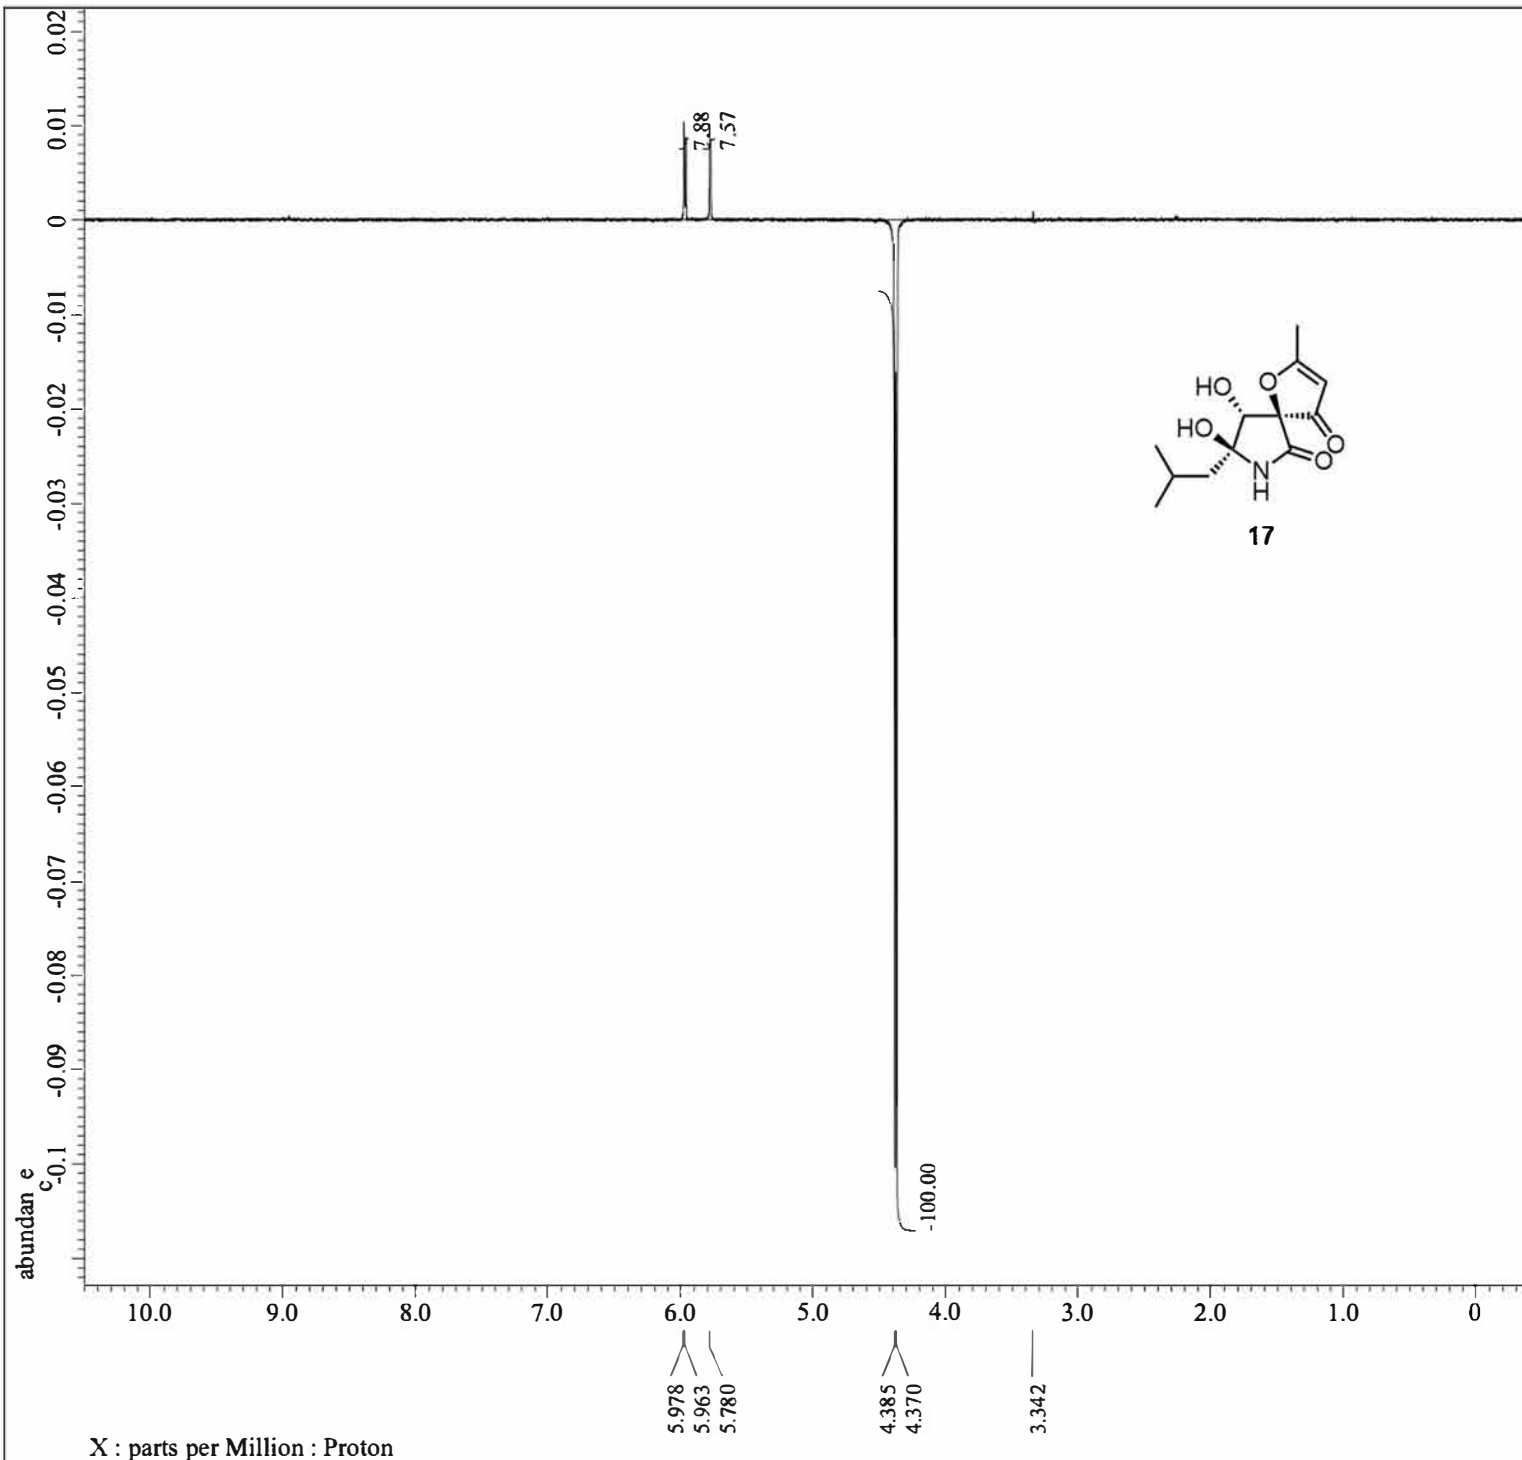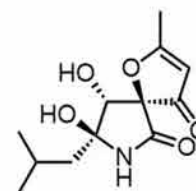

17

Filename = KST-Me-berkeleyamideD  
 Author = delta  
 Experiment = noe\_ld\_dpfge.jxp  
 Sample Id = KST-Me-berkeleyamideD  
 Solvent = DMSO-D6  
 Creation Time = 25-AUG-2021 19:03:15  
 Revision Time = 27-AUG-2021 10:46:56  
 Current Time = 27-AUG-2021 10:47:19

Comment = DPFGE NOE 1D  
 Data Format = 1D COMPLEX  
 Dim Size = 13107  
 Dim Title = Proton  
 Dim Units = [ppm]  
 Dimensions = X  
 Spectrometer = JNM-ECZ400S/L1

Field Strength = 9.389766 [T] (400 [MHz])  
 X Acq Duration = 2.18628096 [s]  
 X Domain = 1H  
 X Freq = 399.78219838 [MHz]  
 X Offset = 5 [ppm]  
 X Points = 16384  
 X Prescans = 2  
 X Resolution = 0.45739775 [Hz]  
 X Sweep = 7.4940048 [kHz]  
 X Sweep Clipped = 5.99520384 [kHz]  
 Irr Domain = Proton  
 Irr Freq = 399.78219838 [MHz]  
 Irr Offset = 5 [ppm]  
 Tri Domain = Proton  
 Tri Freq = 399.78219838 [MHz]  
 Tri Offset = 5 [ppm]  
 Blanking = 2 [us]  
 Clipped = FALSE  
 Decimation Req = r: 834 ( 833), g: 49  
 Scans = 16  
 Total Scans = 16

Relaxation Delay = 7 [s]  
 Recvr Gain = 50  
 Temp Get = 21.5 [dC]  
 Mix Time = 0.5 [s]  
 X Acq Time = 2.18628096 [s]  
 X Atn = 2.4 [dB]  
 X Pulse = 6.15 [us]  
 Irr Mode = Off  
 Obs Sel 180 = 40 [ms]  
 Obs Sel Atn = 64.932 [dB]  
 Obs Sel Offset = 4.36573172 [ppm]  
 Obs Sel Shape = GAUSS  
 Obs Sel Slp = 4.36573172 [ppm]  
 Tri Mode = Off  
 Comment 1 = \*\*\* Pulse \*\*\*  
 Comment 11 = \*\*\* NOESY mixing time \*\*\*  
 Comment 111 = \*\*\* presat time \*\*\*  
 Comment 201 = \*\*\* obs\_dante\_presatu \*\*\*  
 Comment 202 = \*\*\* irr\_preaturation \*\*\*  
 Comment 203 = \*\*\* tri\_preaturation \*\*\*  
 Comment 32 = \*\*\* Selective 180deg \*\*\*  
 Comment 7 = \*\*\* Pulse Delay \*\*\*  
 Comment 8 = \*\*\* Pulse Field Gradi \*\*\*  
 Comment 900 = \*\*\* lock hold \*\*\*  
 Dante Loop = 699

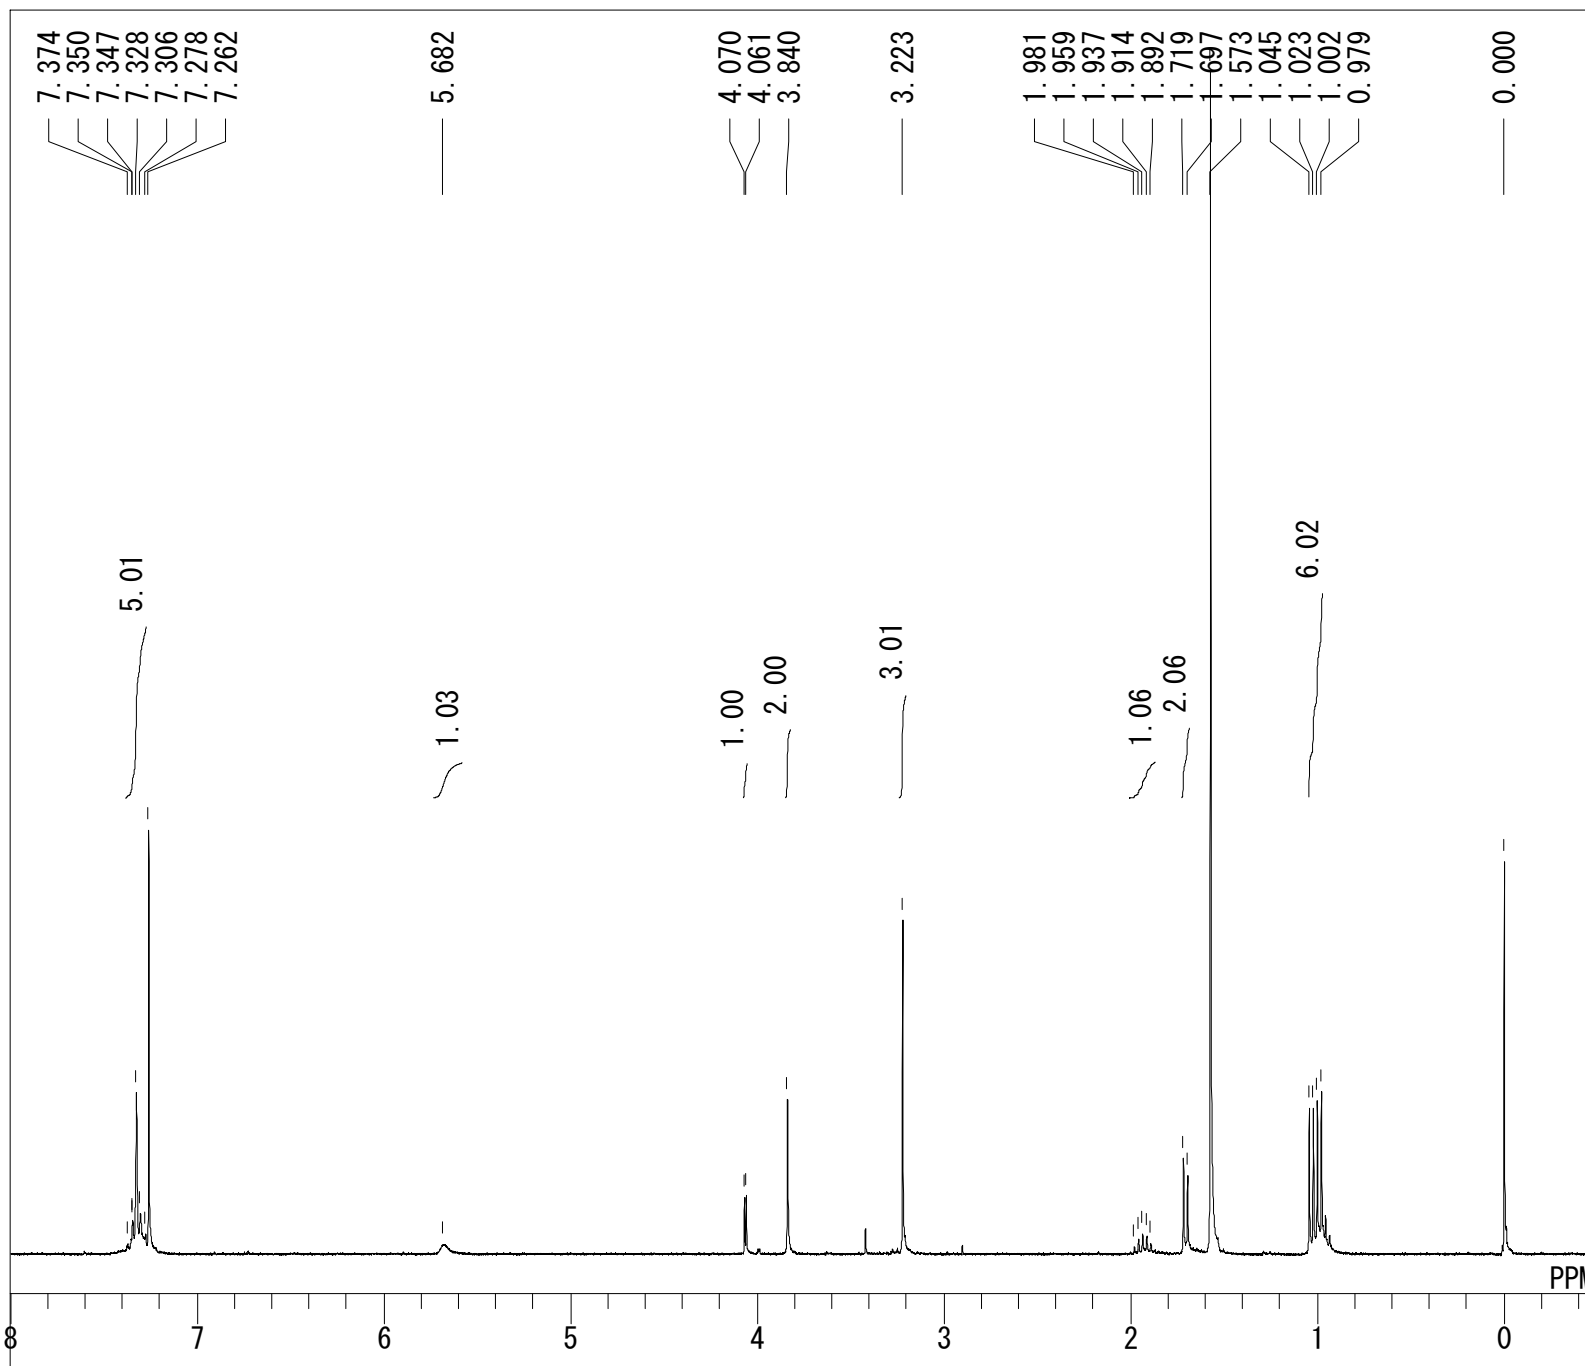

OBFRQ 300.40 MHz  
 OBSET 130.00 KHz  
 OBFIN 1150.00 Hz  
 POINT 32768  
 FREQU 6006.01 Hz  
 SCANS 16  
 ACQTM 5.4559 sec  
 PD 1.5440 sec  
 PW1 5.20 usec  
 IRNUC 1H  
 CTEMP 25.3 c  
 SLVNT CDCL3  
 EXREF 0.00 ppm  
 BF 0.12 Hz  
 RGAIN 22

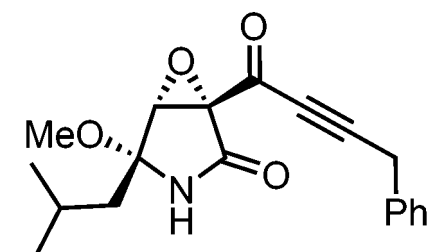

**10**

<sup>1</sup>H NMR

CDCl<sub>3</sub> (300 MHz)

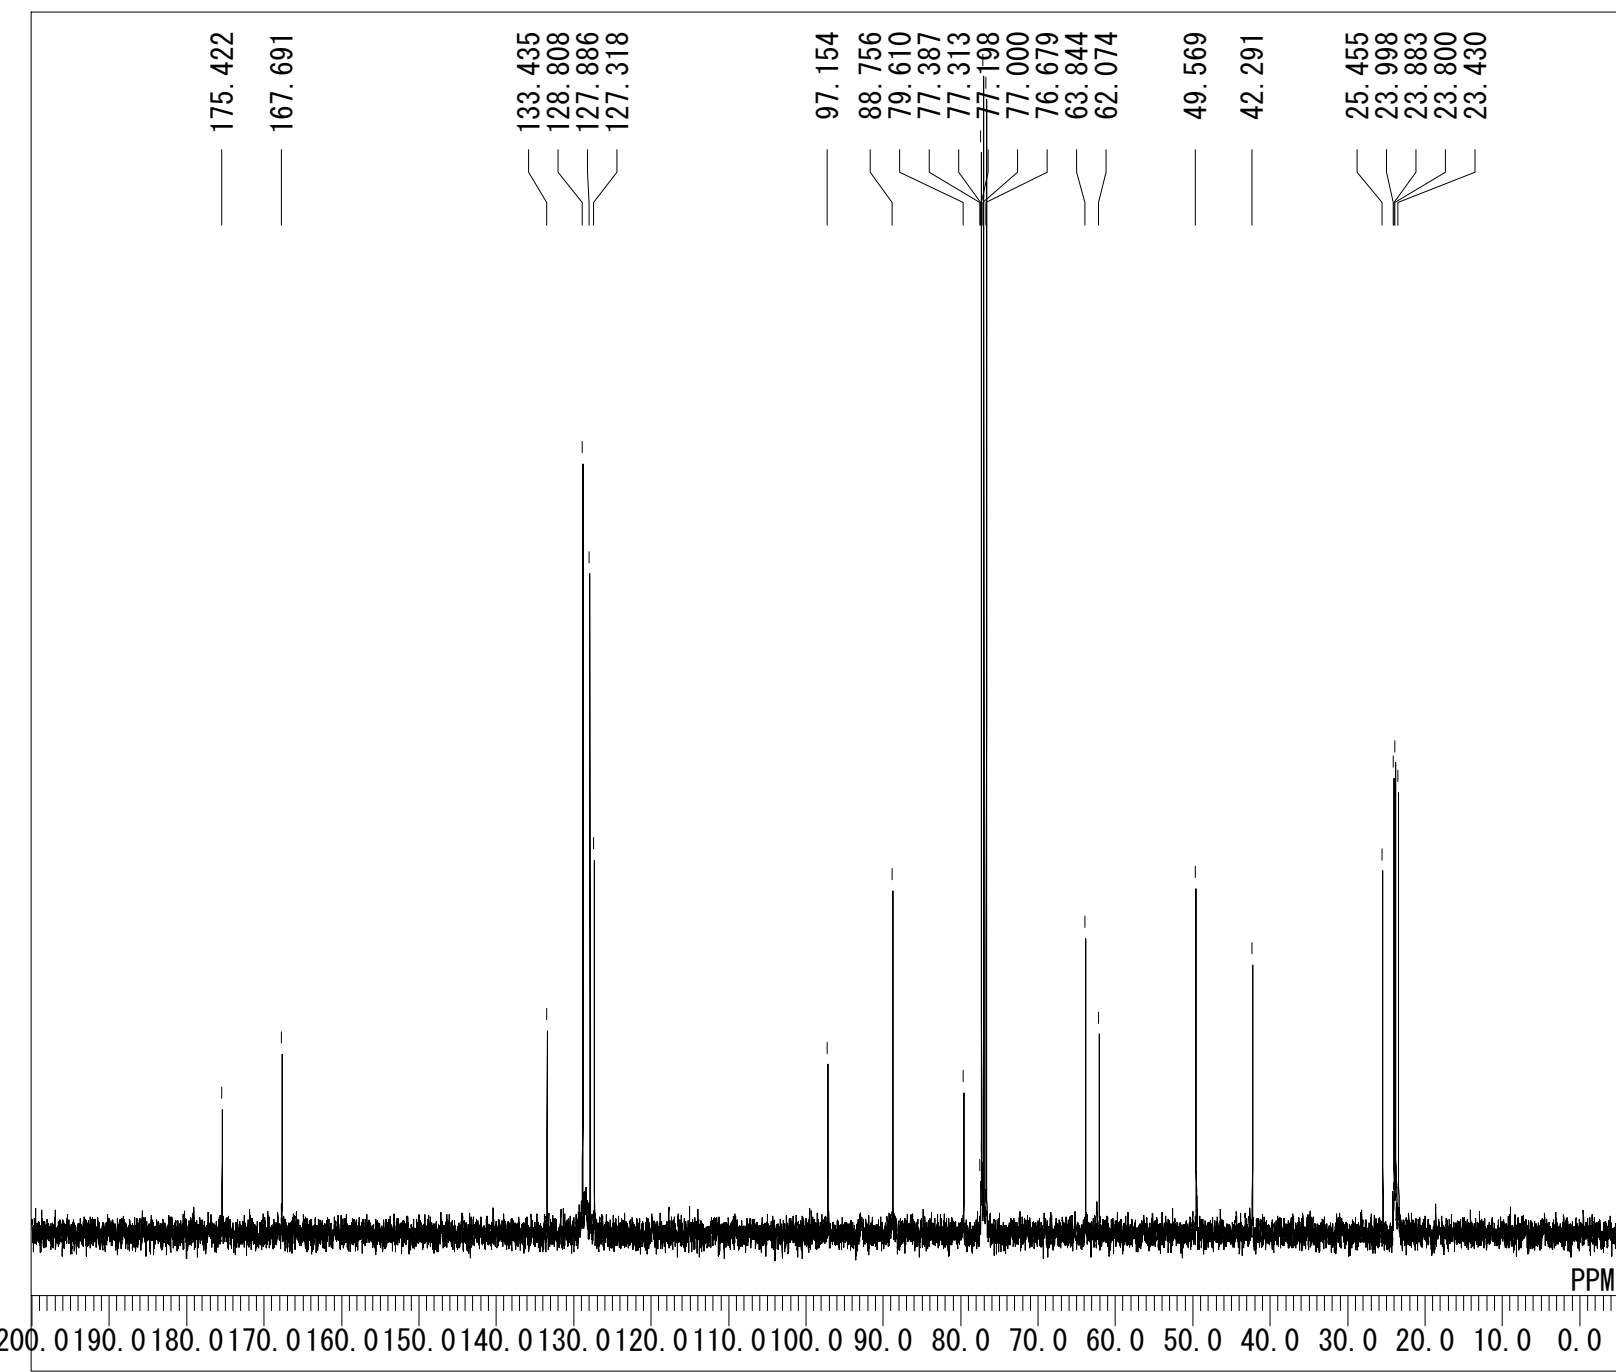

OBFRQ 100.40 MHz  
 OBSET 125.00 KHz  
 OBFIN 10500.00 Hz  
 POINT 32768  
 FREQU 27118.64 Hz  
 SCANS 150  
 ACQTM 1.2083 sec  
 PD 1.7920 sec  
 PW1 5.80 usec  
 IRNUC 1H  
 CTEMP 26.6 c  
 SLVNT CDCL3  
 EXREF 77.00 ppm  
 BF 1.20 Hz  
 RGAIN 25

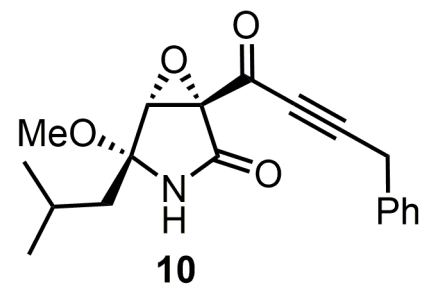

<sup>13</sup>C NMR  
 CDCl<sub>3</sub> (100 MHz)

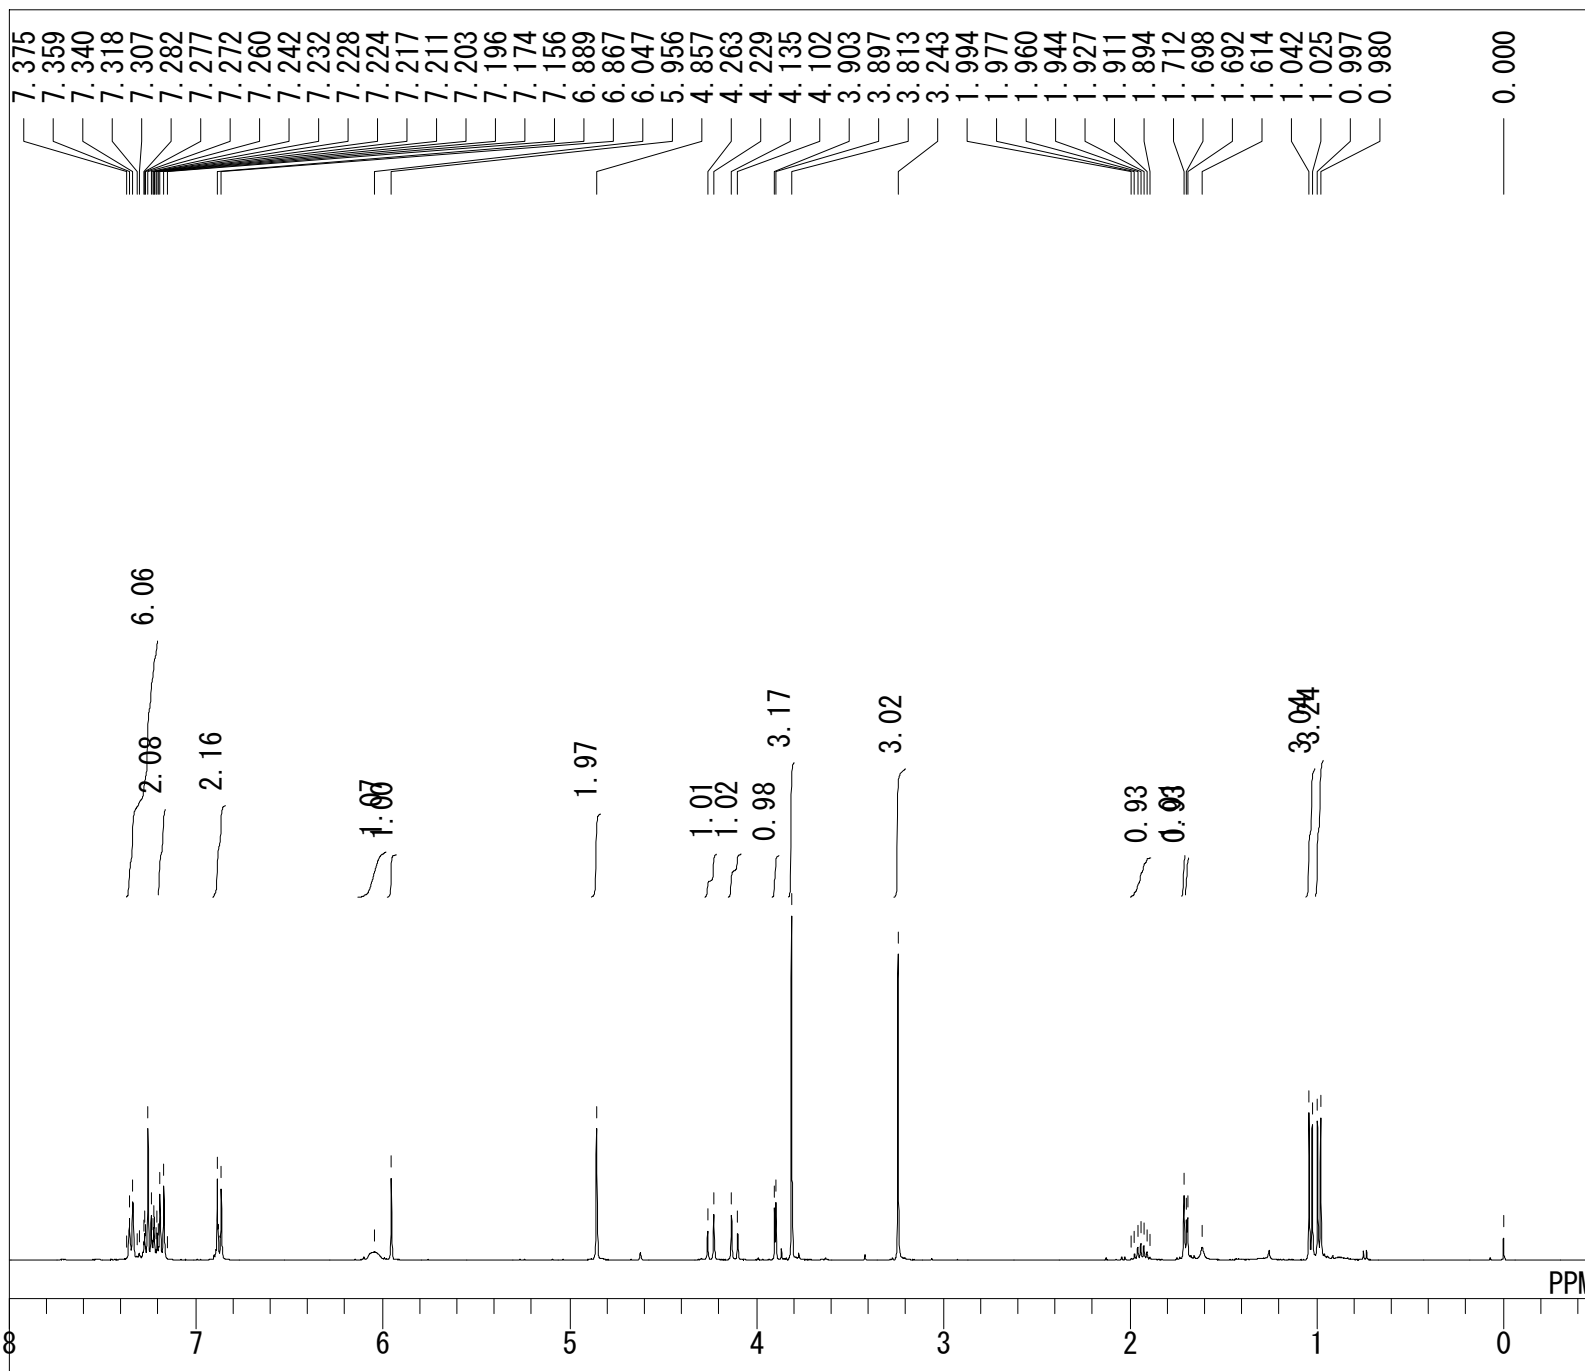

OBFRQ 399.65 MHz  
 OBSET 124.00 KHz  
 OBFIN 10500.00 Hz  
 POINT 16384  
 FREQU 7992.01 Hz  
 SCANS 8  
 ACQTM 2.0500 sec  
 PD 4.9500 sec  
 PW1 5.80 usec  
 IRNUC 1H  
 CTEMP 24.0 c  
 SLVNT CDCL3  
 EXREF 0.00 ppm  
 BF 0.12 Hz  
 RGAIN 18

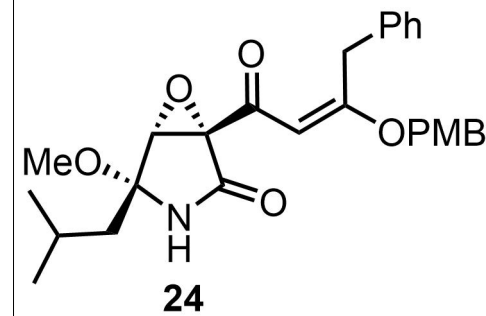

<sup>1</sup>H NMR  
 CDCl<sub>3</sub> (400 MHz)

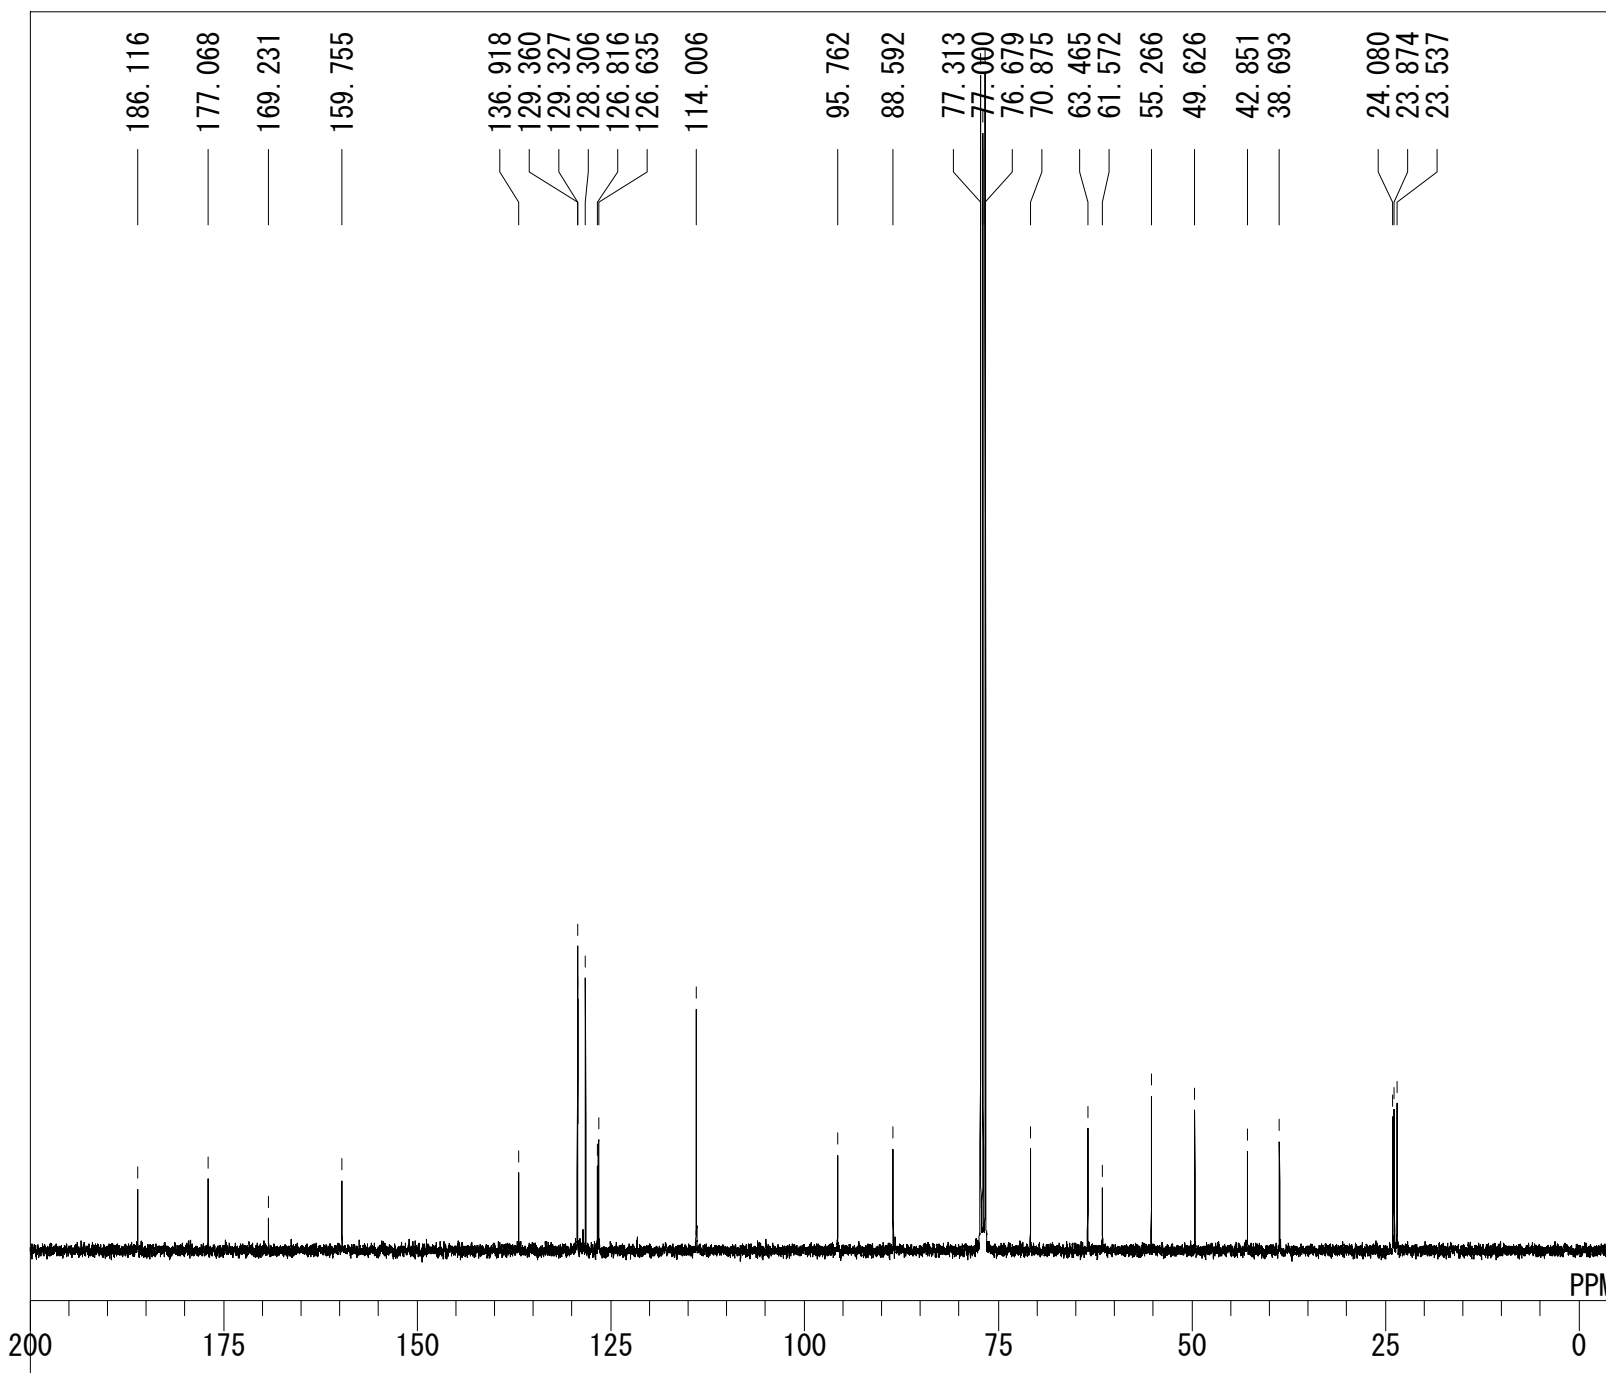

OBFRQ 100.40 MHz  
 OBSET 125.00 KHz  
 OBFIN 10500.00 Hz  
 POINT 32768  
 FREQU 27118.64 Hz  
 SCANS 1000  
 ACQTM 1.2083 sec  
 PD 1.7920 sec  
 PW1 5.80 usec  
 IRNUC 1H  
 CTEMP 24.3 c  
 SLVNT CDCL3  
 EXREF 77.00 ppm  
 BF 1.20 Hz  
 RGAIN 25

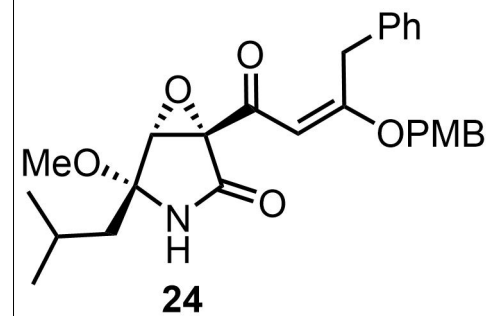

<sup>13</sup>C NMR  
 CDCl<sub>3</sub> (100 MHz)



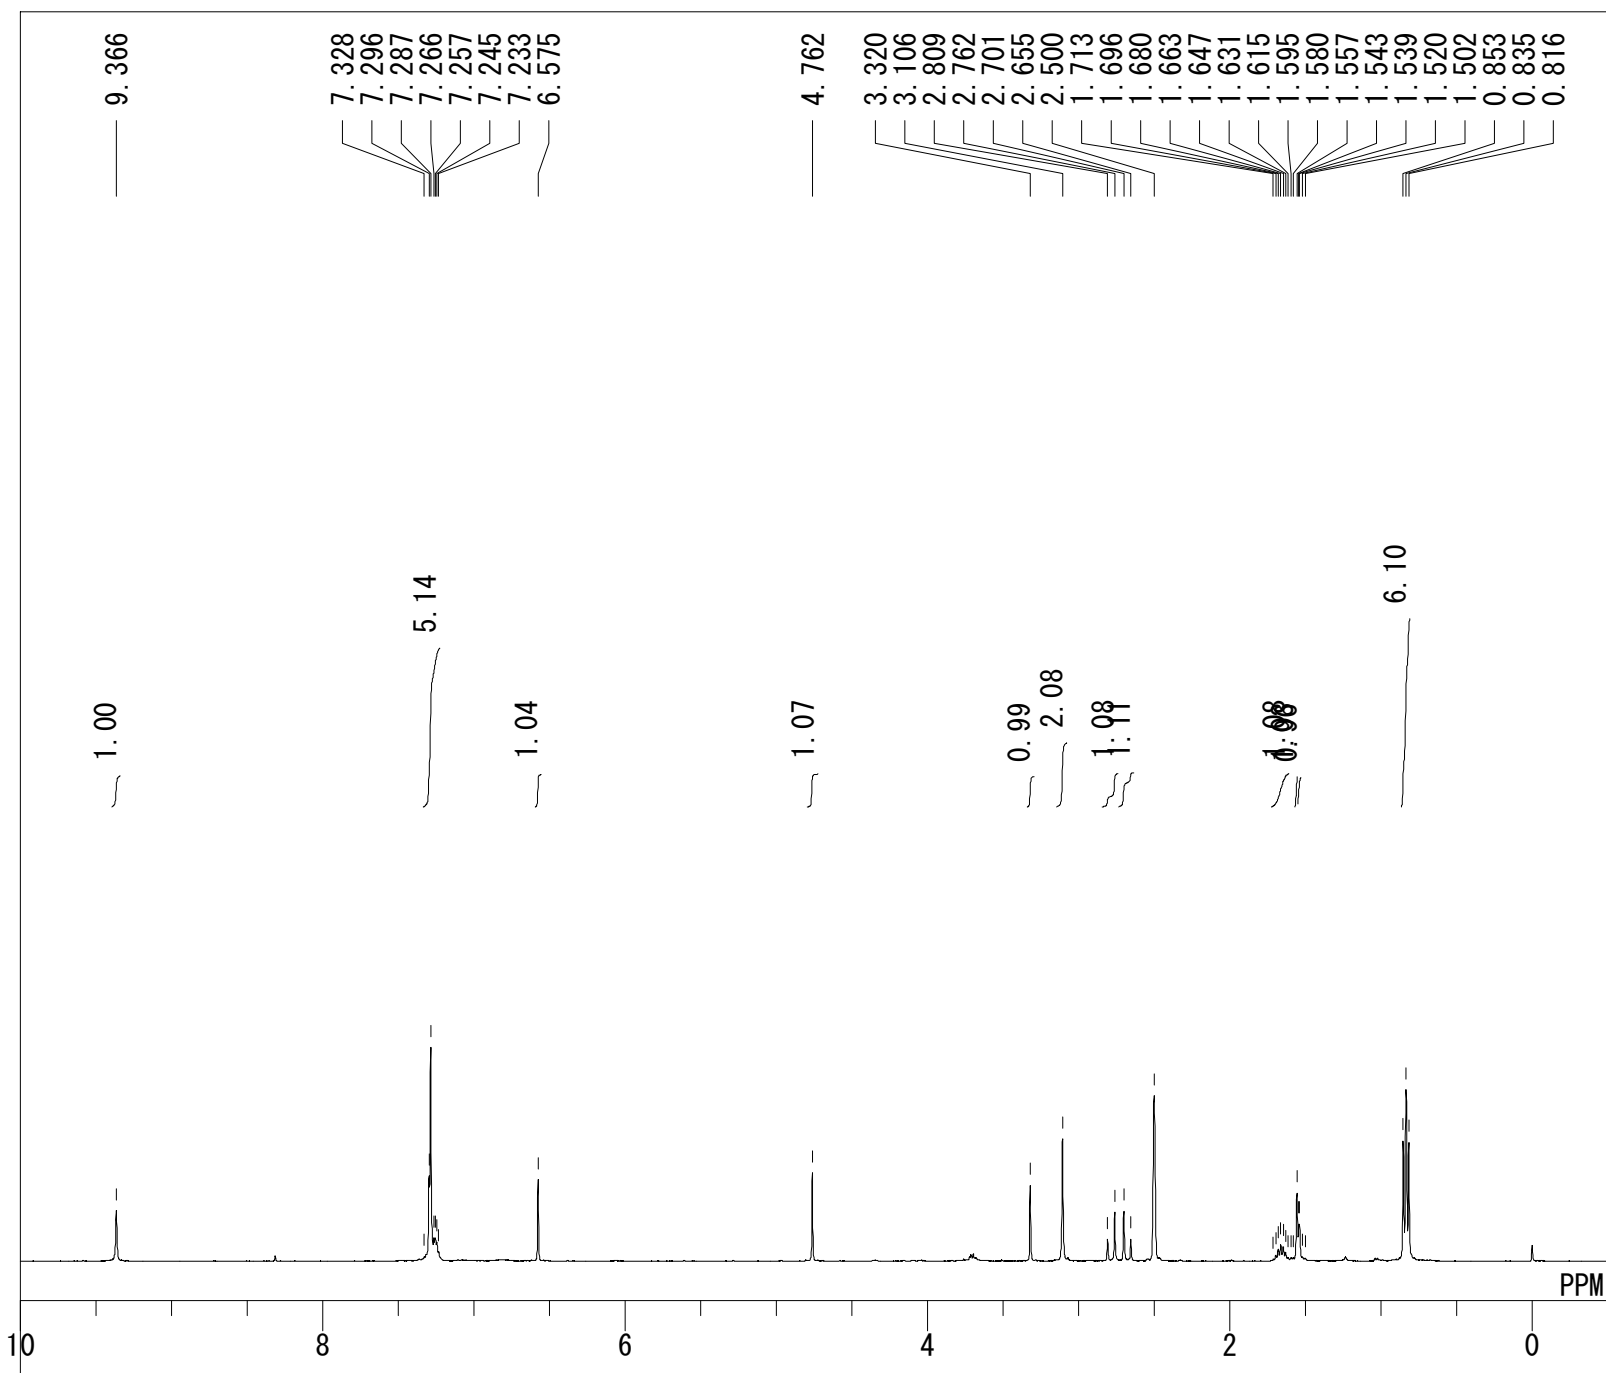

OBFRQ 399.65 MHz  
 OBSET 124.00 KHz  
 OBFIN 10500.00 Hz  
 POINT 16384  
 FREQU 7992.01 Hz  
 SCANS 8  
 ACQTM 2.0500 sec  
 PD 4.9500 sec  
 PW1 5.80 usec  
 IRNUC 1H  
 CTEMP 24.2 c  
 SLVNT DMSO  
 EXREF 0.00 ppm  
 BF 0.12 Hz  
 RGAIN 18

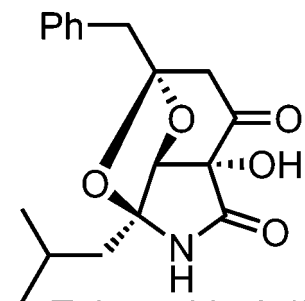

Taramide A (2)

<sup>1</sup>H NMR

DMSO-*d*<sub>6</sub> (400 MHz)

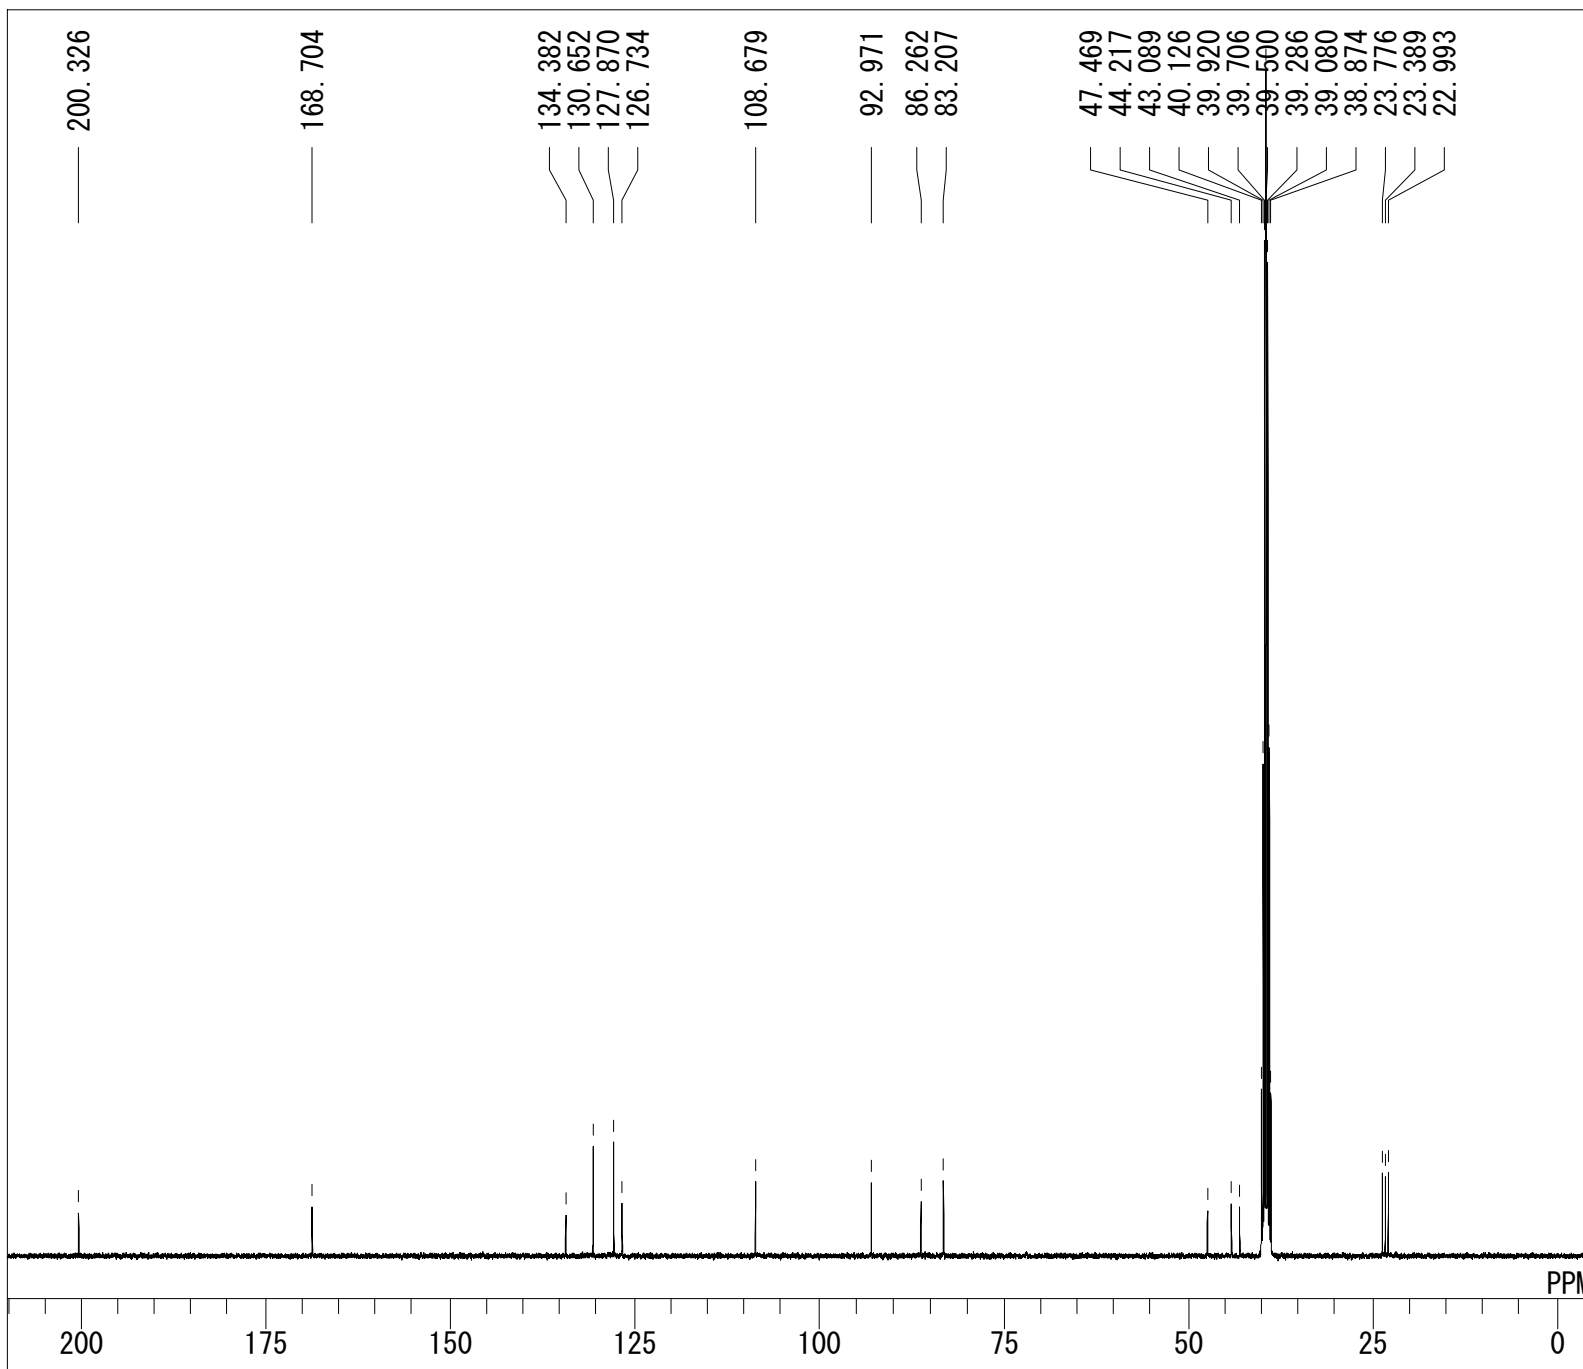

OBFRQ 100.40 MHz  
 OBSET 125.00 KHz  
 OBFIN 10500.00 Hz  
 POINT 32768  
 FREQU 27118.64 Hz  
 SCANS 1972  
 ACQTM 1.2083 sec  
 PD 1.7920 sec  
 PW1 5.80 usec  
 IRNUC 1H  
 CTEMP 24.3 c  
 SLVNT DMSO  
 EXREF 39.50 ppm  
 BF 1.20 Hz  
 RGAIN 24

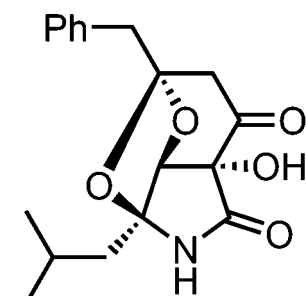

Taramide A (2)

<sup>13</sup>C NMR

DMSO-*d*<sub>6</sub> (100 MHz)

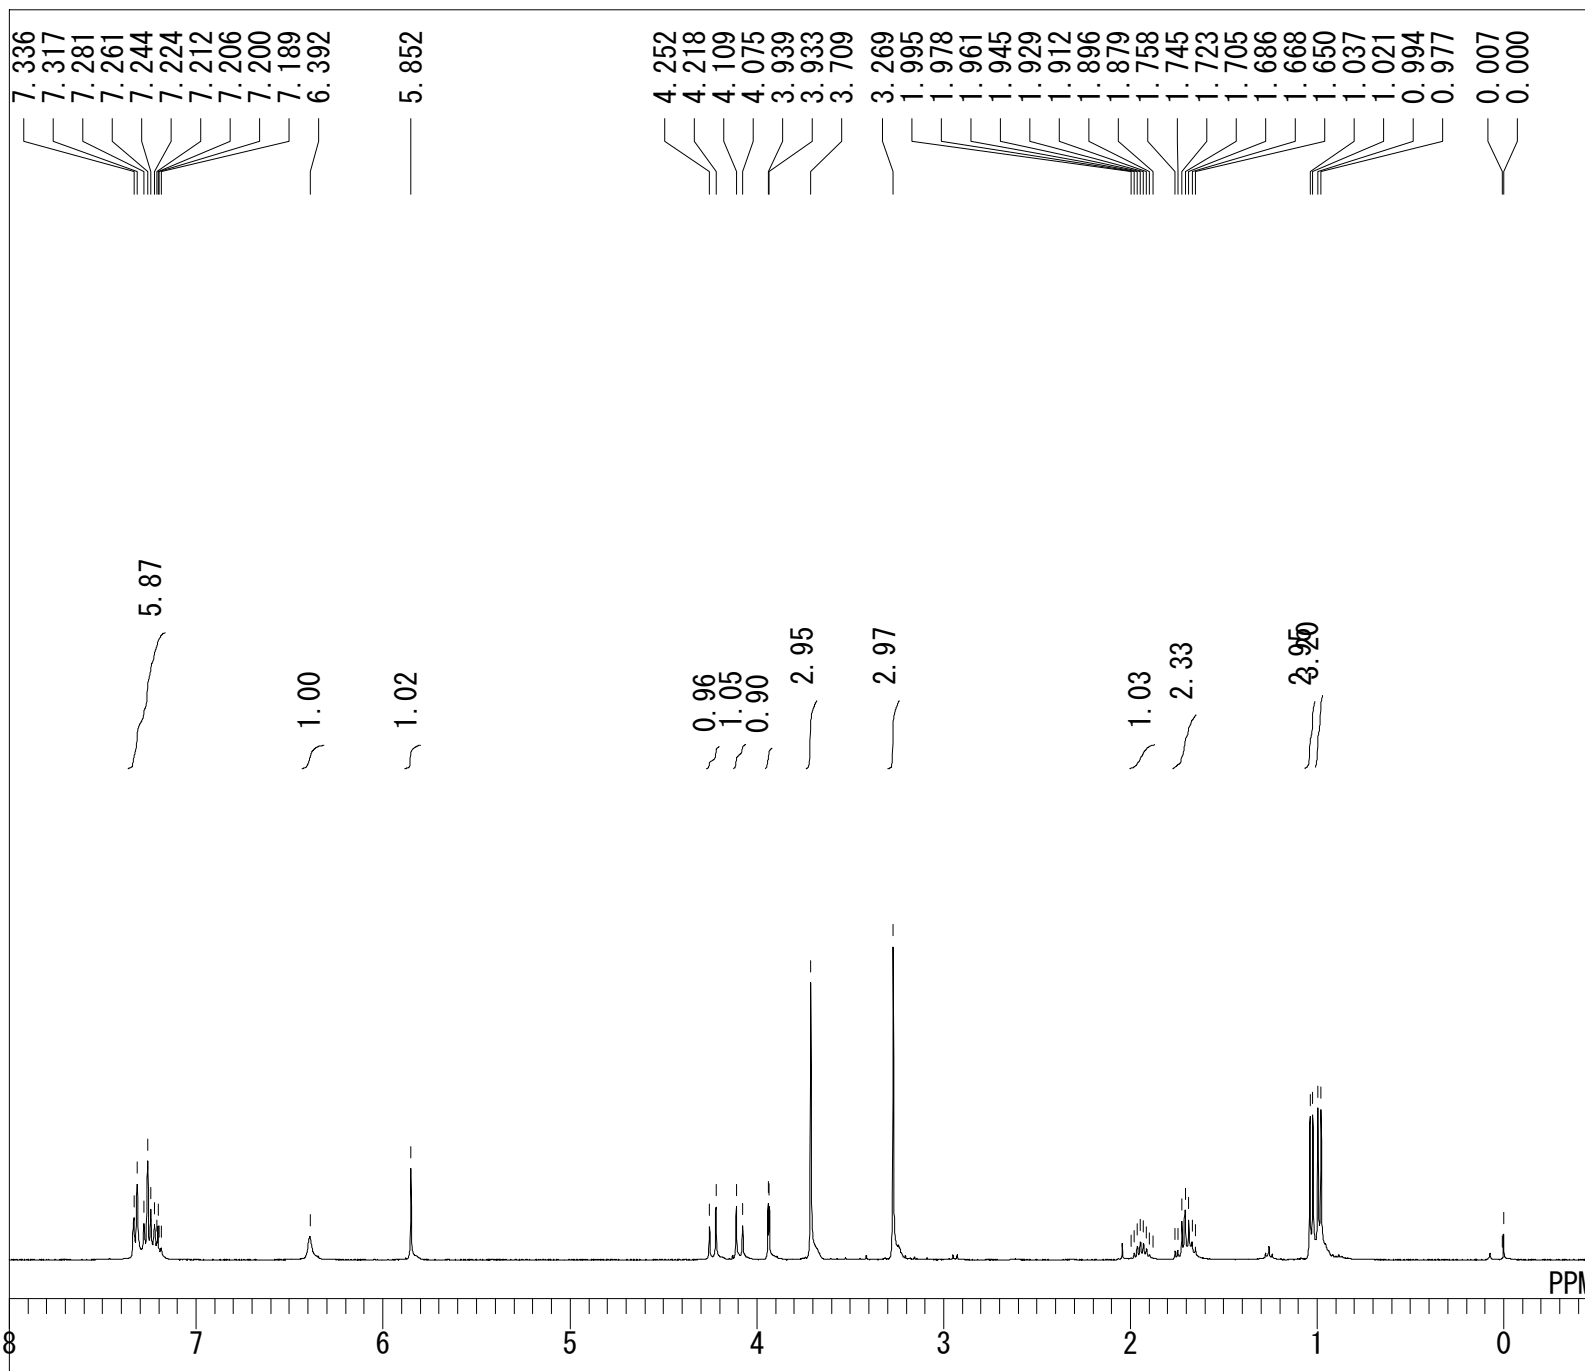

OBFRQ 399.65 MHz  
 OBSET 124.00 KHz  
 OBFIN 10500.00 Hz  
 POINT 16384  
 FREQU 7992.01 Hz  
 SCANS 8  
 ACQTM 2.0500 sec  
 PD 4.9500 sec  
 PW1 5.80 usec  
 IRNUC 1H  
 CTEMP 24.0 c  
 SLVNT CDCL3  
 EXREF 0.00 ppm  
 BF 0.10 Hz  
 RGAIN 16

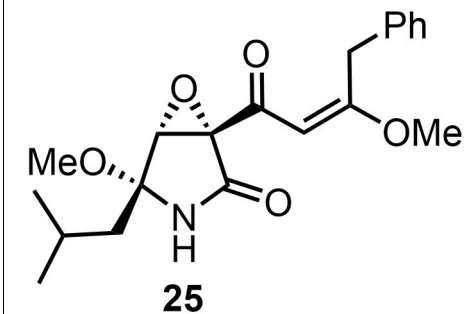

<sup>1</sup>H NMR  
 CDCl<sub>3</sub> (400 MHz)

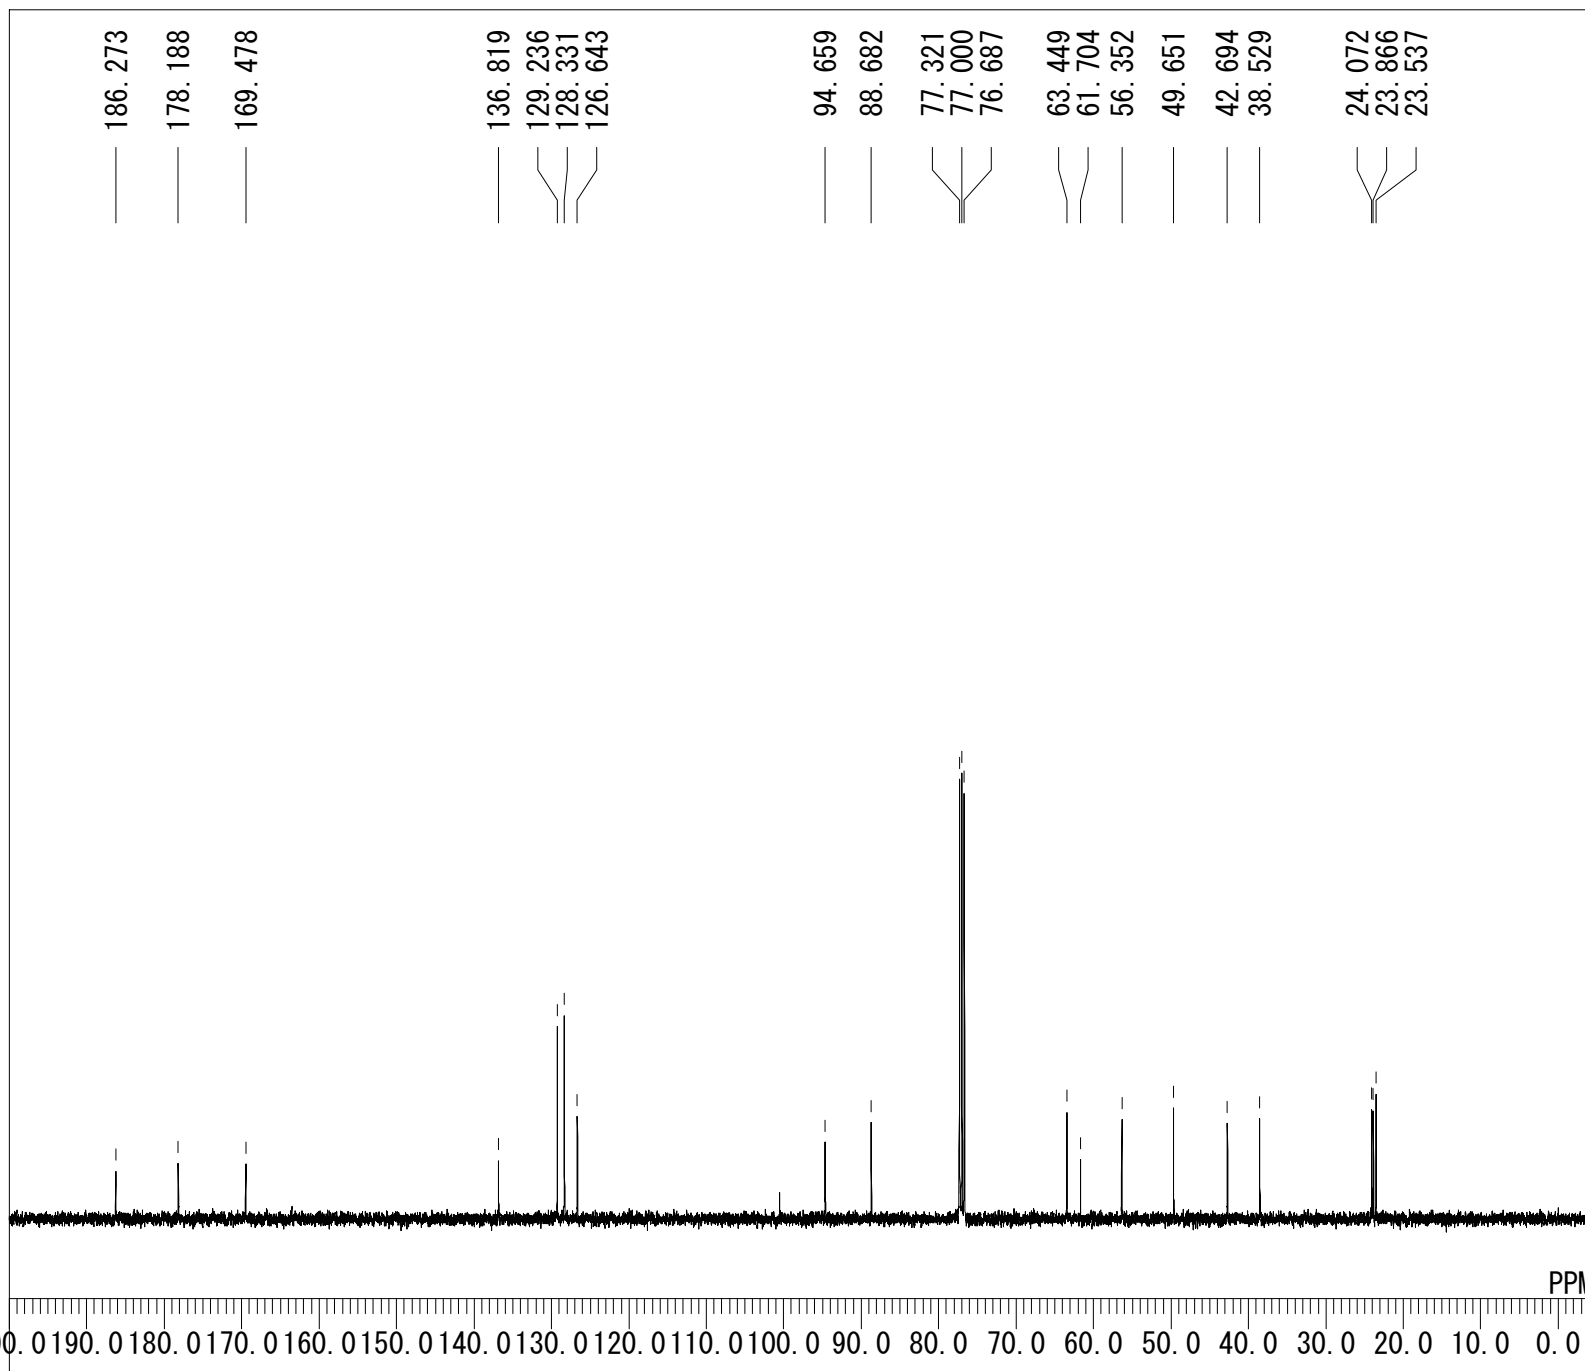

OBFRQ 100.40 MHz  
 OBSET 125.00 KHz  
 OBFIN 10500.00 Hz  
 POINT 32768  
 FREQU 27118.64 Hz  
 SCANS 200  
 ACQTM 1.2083 sec  
 PD 1.7920 sec  
 PW1 5.80 usec  
 IRNUC 1H  
 CTEMP 24.3 c  
 SLVNT CDCL3  
 EXREF 77.00 ppm  
 BF 1.20 Hz  
 RGAIN 25

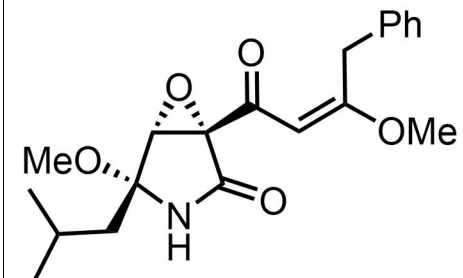

25

<sup>13</sup>C NMR

CDCl<sub>3</sub> (100 MHz)

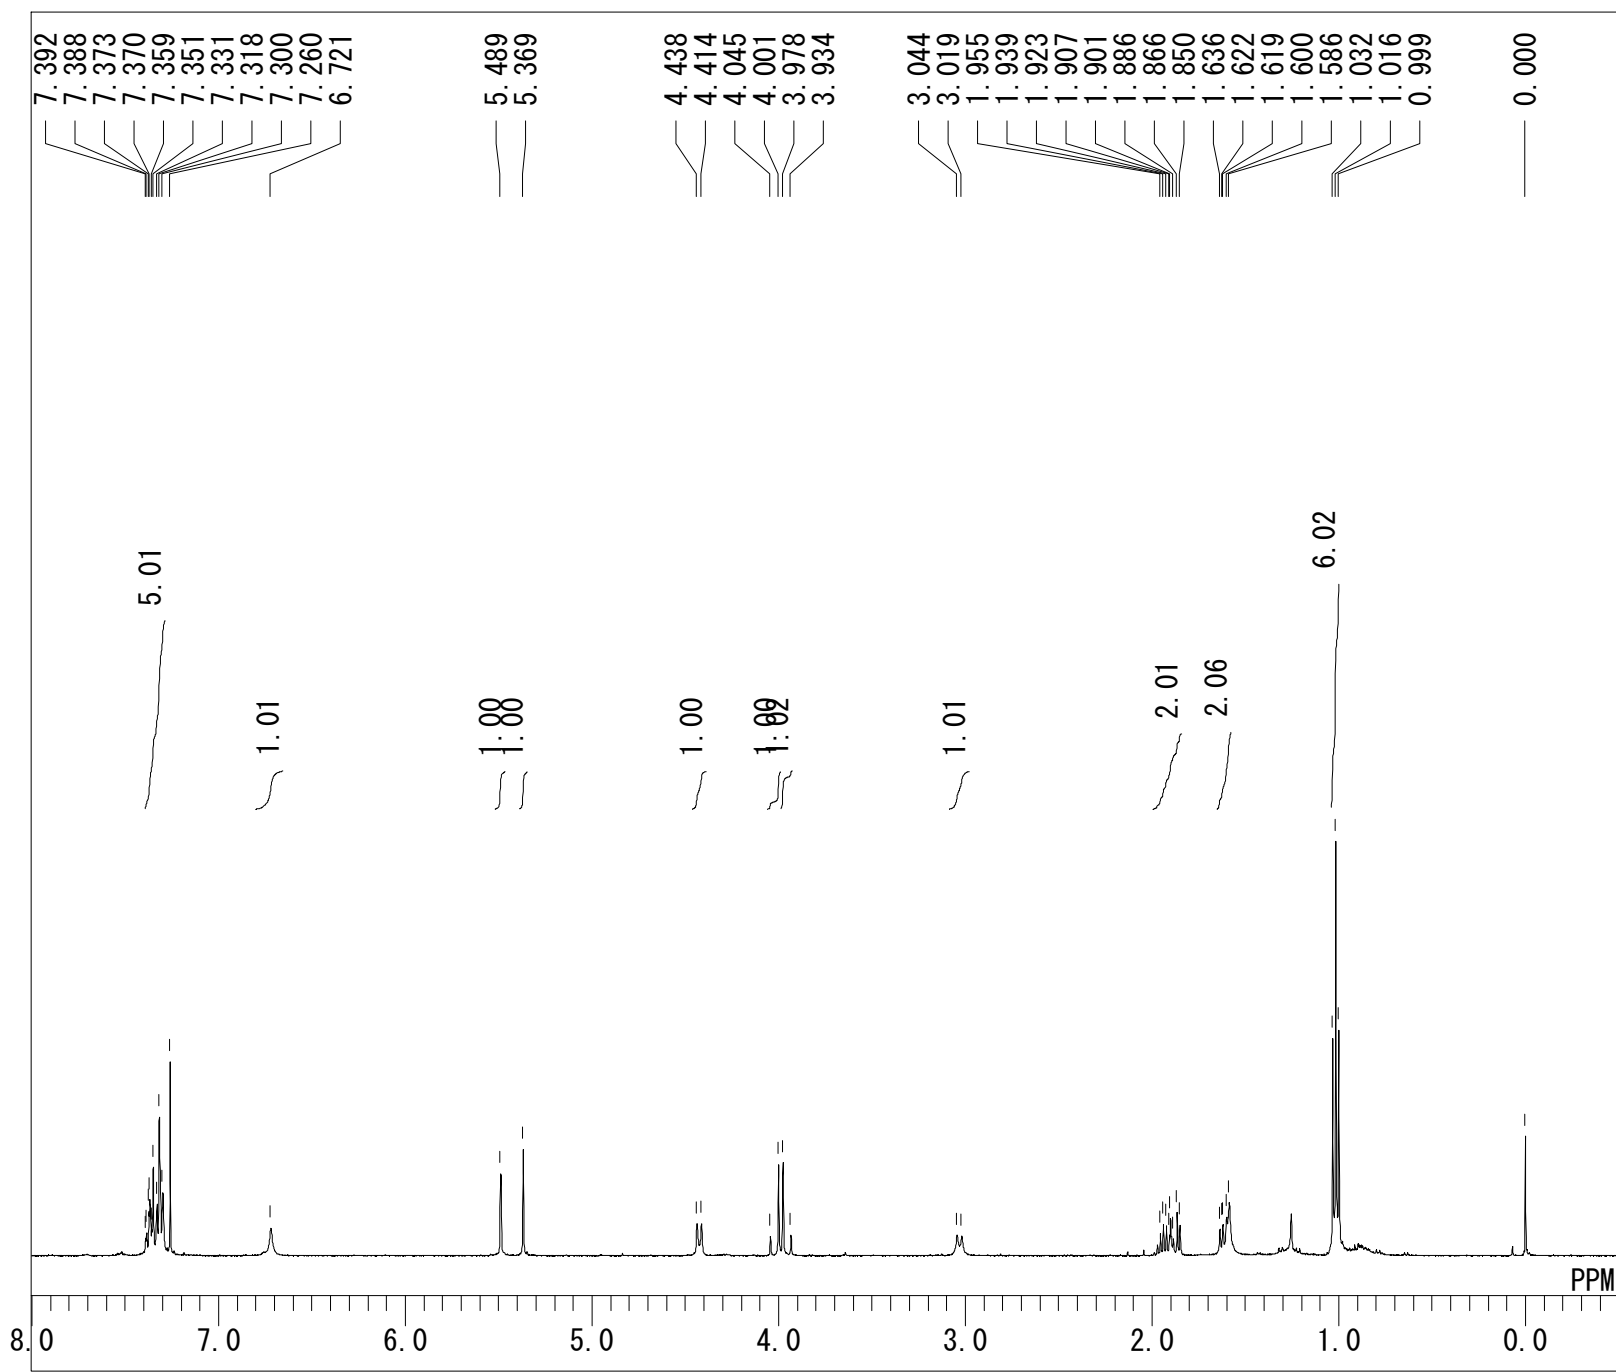

OBFREQ 399.65 MHz  
 OBSET 124.00 KHz  
 OBFIN 10500.00 Hz  
 POINT 16384  
 FREQU 7992.01 Hz  
 SCANS 8  
 ACQTM 2.0500 sec  
 PD 4.9500 sec  
 PW1 5.60 usec  
 IRNUC 1H  
 CTEMP 24.0 c  
 SLVNT CDCL3  
 EXREF 0.00 ppm  
 BF 0.12 Hz  
 RGAIN 20

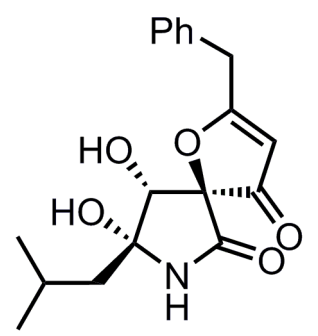

Berkeleyamide D (3)  
<sup>1</sup>H NMR  
 CDCl<sub>3</sub> (400 MHz)

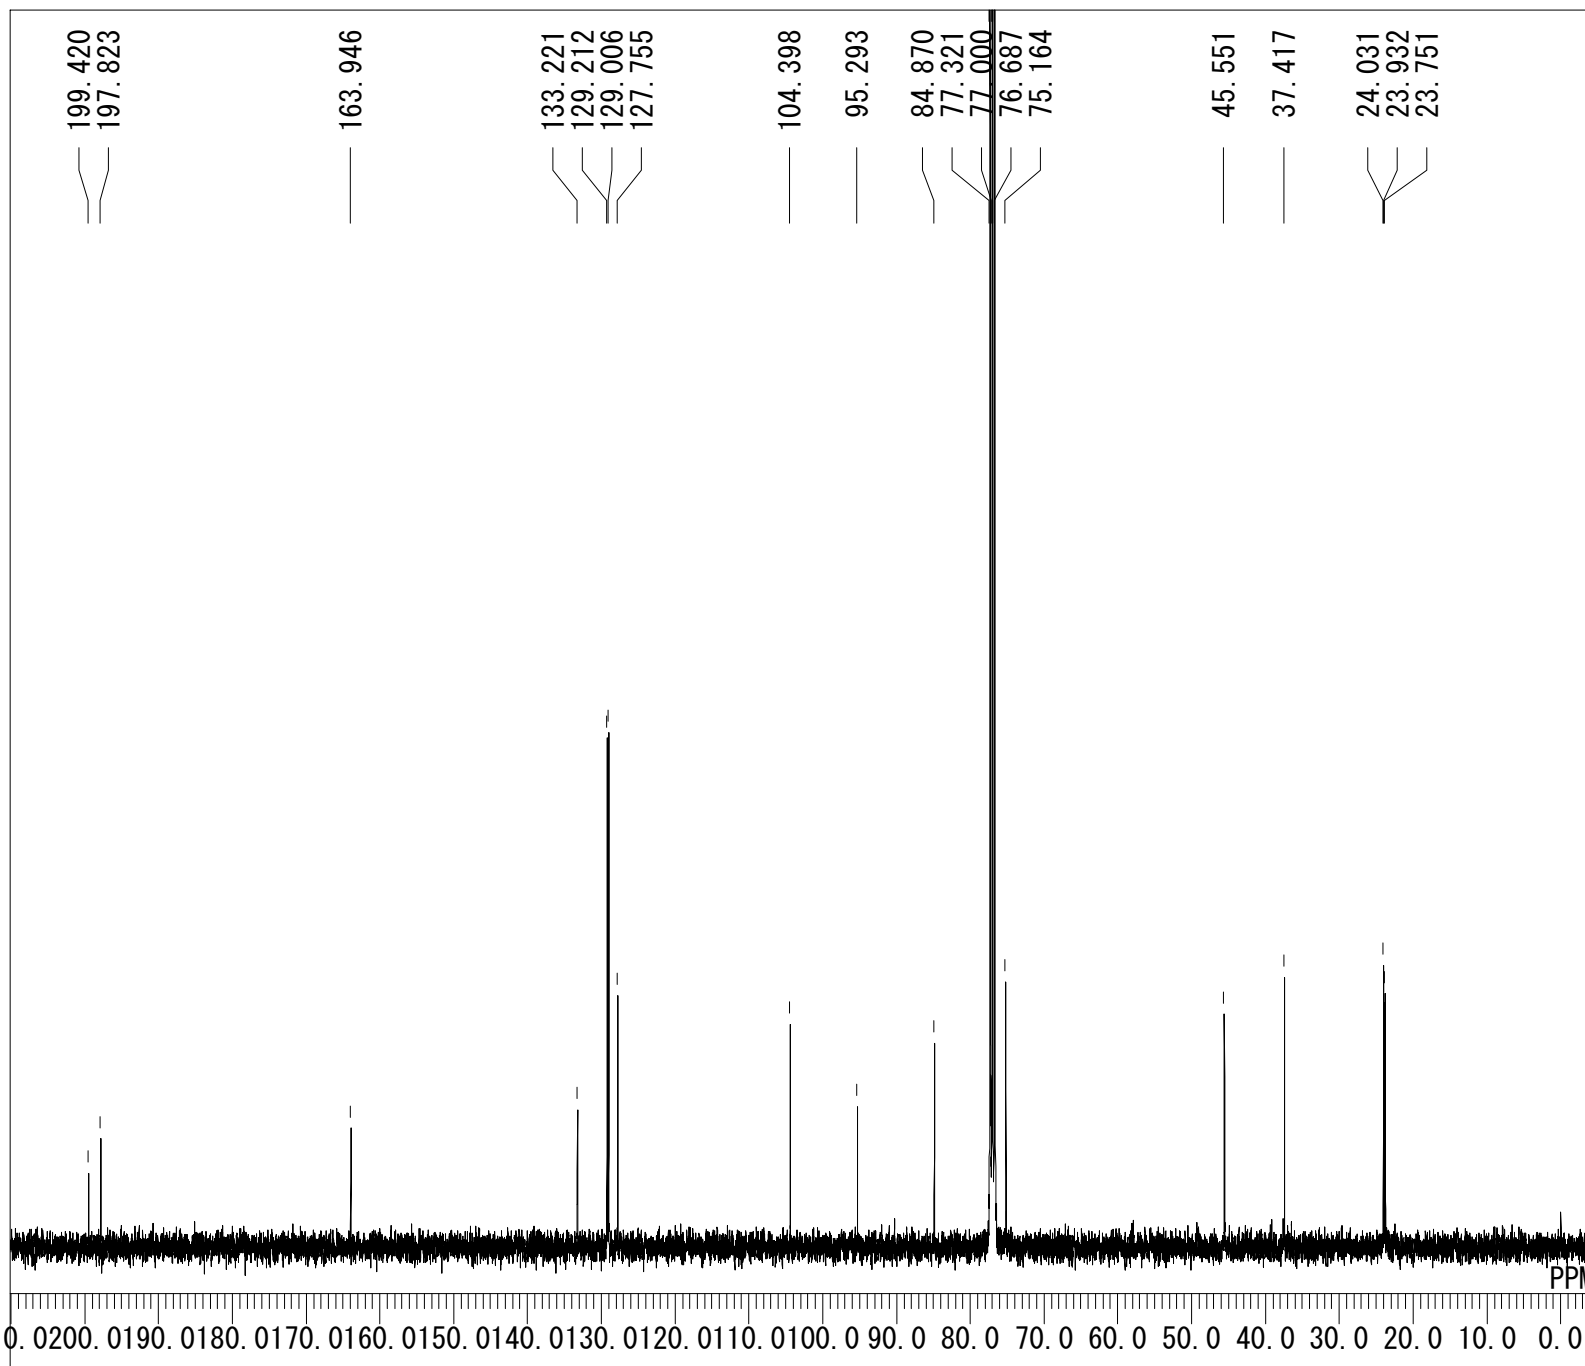

OBFREQ 100.40 MHz  
 OBSET 125.00 KHz  
 OBFIN 10500.00 Hz  
 POINT 32768  
 FREQU 27118.64 Hz  
 SCANS 2000  
 ACQTM 1.2083 sec  
 PD 1.7920 sec  
 PW1 5.80 usec  
 IRNUC 1H  
 CTEMP 24.6 c  
 SLVNT CDCL3  
 EXREF 77.00 ppm  
 BF 1.20 Hz  
 RGAIN 25

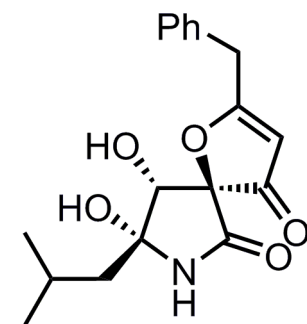

Berkeleyamide D (3)  
<sup>13</sup>C NMR  
 CDCl<sub>3</sub> (100 MHz)

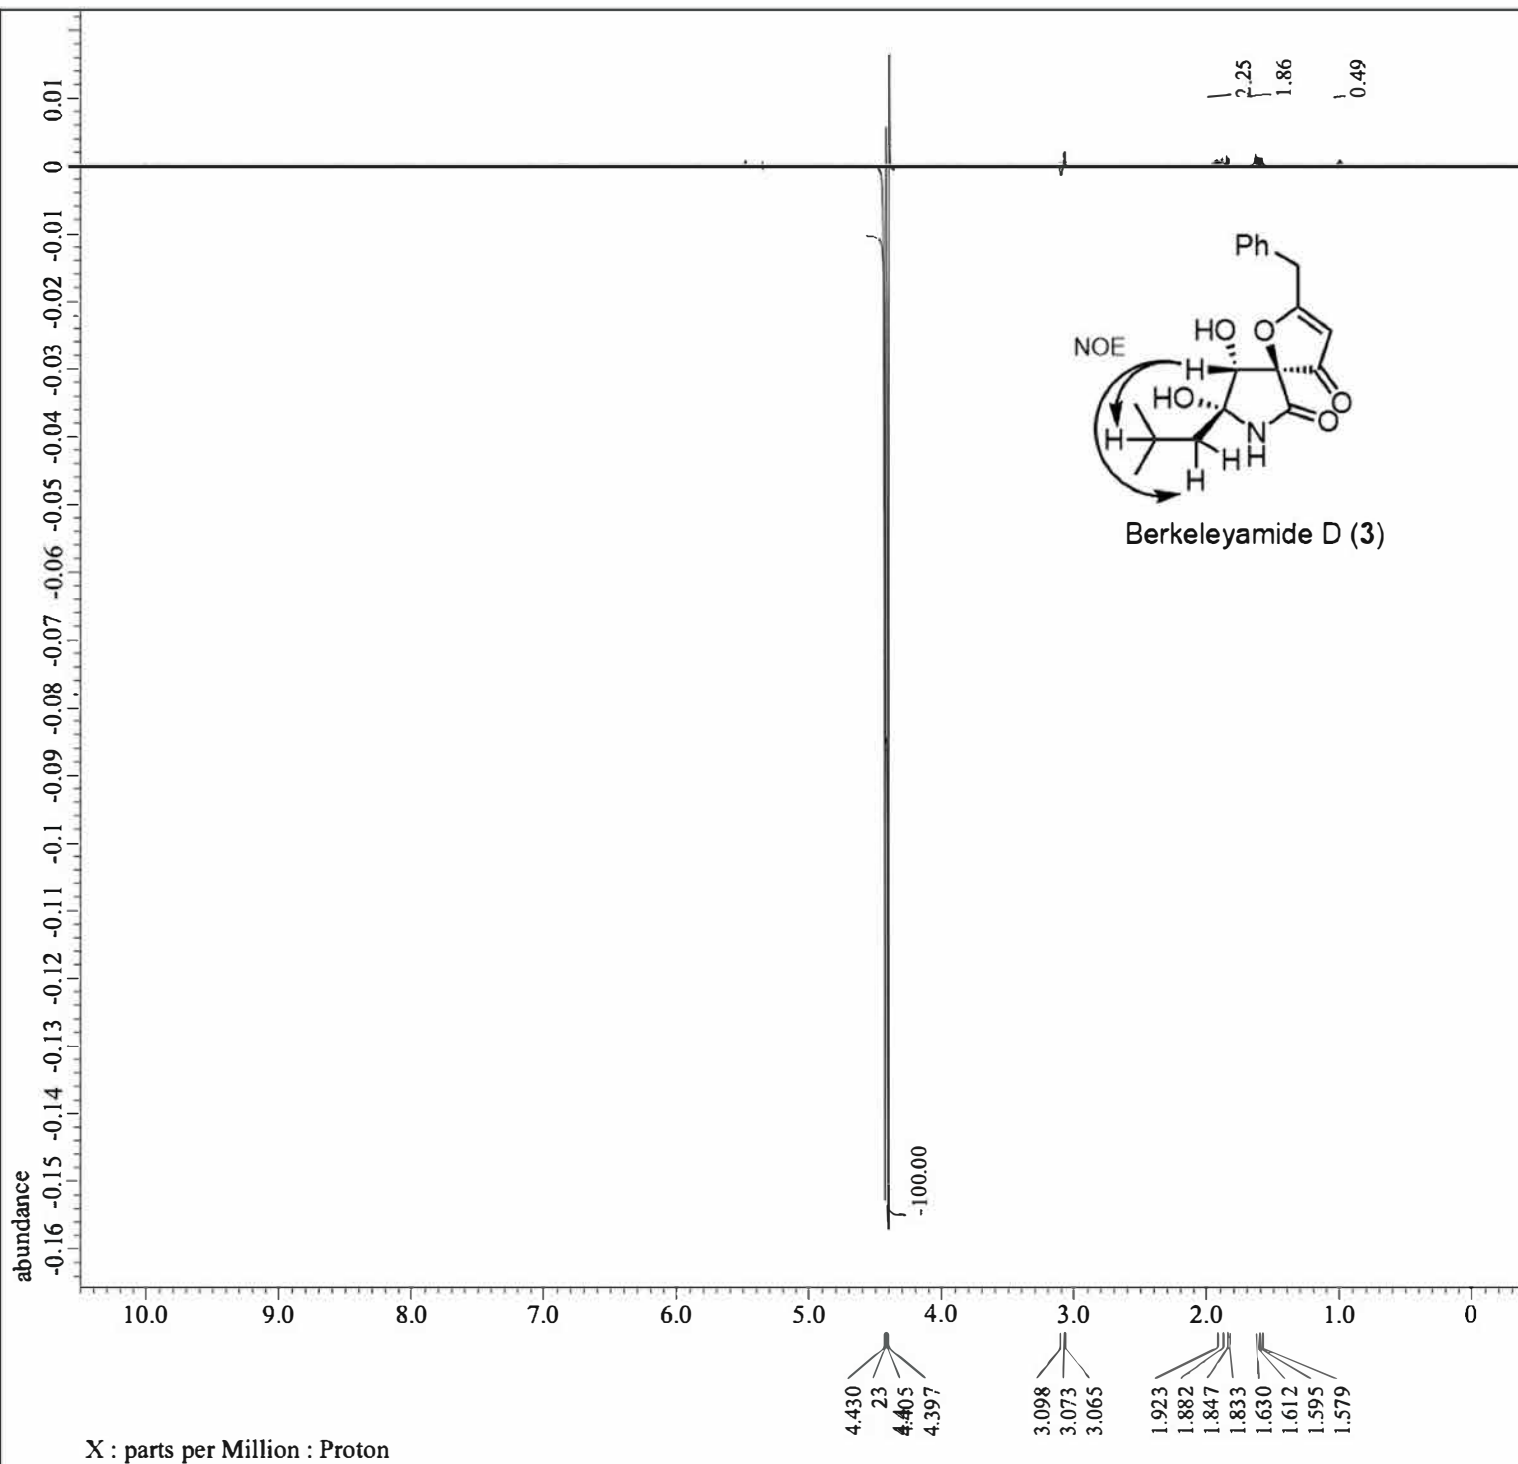

Filename = KST-berkeleyamideD\_no  
 Author = delta  
 Experiment = noe\_1d\_dpfge.jxp  
 Sample Id = KST-berkeleyamideD  
 Solvent = CHLOROFORM-D  
 Creation\_Time = 23-AUG-2021 17:10:32  
 Revision\_Time = 27-AUG-2021 10:40:25  
 Current\_Time = 27-AUG-2021 10:40:57

Comment = DPFGE NOE 1D  
 Data\_Format = 1D COMPLEX  
 Dim\_Size = 13107  
 Dim\_Title = Proton  
 Dim\_Units = [ppm]  
 Dimensions = X  
 Spectrometer = JNM-ECZ400S/L1

Field\_Strength = 9.389766[T] (400 [MHz])  
 X\_Acq\_Duration = 2.18628096[s]  
 X\_Domain = 1H  
 X\_Freq = 399.78219838 [MHz]  
 X\_Offset = 5 [ppm]  
 X\_Points = 16384  
 X\_Prescans = 2  
 X\_Resolution = 0.45739775 [Hz]  
 X\_Sweep = 7.4940048 [kHz]  
 X\_Sweep\_Clippped = 5.99520384 [kHz]  
 Irr\_Domain = Proton  
 Irr\_Freq = 399.78219838 [MHz]  
 Irr\_Offset = 5 [ppm]  
 Tri\_Domain = Proton  
 Tri\_Freq = 399.78219838 [MHz]  
 Tri\_Offset = 5 [ppm]  
 Blanking = 2 [us]  
 Clipped = FALSE  
 Decimation\_Reg = r: 834 ( 833), g: 49  
 Scans = 16  
 Total\_Scans = 16

Relaxation\_Delay = 7 [s]  
 Recvr\_Gain = 50  
 Temp\_Get = 21.6 [dC]  
 Mix\_Time = 0.5 [s]  
 X\_Acq\_Time = 2.18628096 [s]  
 X\_Atn = 2.4 [dB]  
 X\_Pulse = 6.15 [us]  
 Irr\_Mode = Off  
 Obs\_Sel\_180 = 40 [ms]  
 Obs\_Sel\_Atn = 64.932 [dB]  
 Obs\_Sel\_Offset = 4.42566776 [ppm]  
 Obs\_Sel\_Shape = GAUSS  
 Obs\_Sel\_Slp = 4.42566776 [ppm]  
 Tri\_Mode = Off  
 Comment\_1 = \*\*\* Pulse \*\*\*  
 Comment\_11 = \*\*\* NOESY mixing time \*\*\*  
 Comment\_111 = \*\*\* presat\_time \*\*\*  
 Comment\_201 = \*\*\* obs\_dante\_presatu \*\*\*  
 Comment\_202 = \*\*\* irr\_preaturation \*\*\*  
 Comment\_203 = \*\*\* tri\_preaturation \*\*\*  
 Comment\_32 = \*\*\* Selective 180deg \*\*\*  
 Comment\_7 = \*\*\* Pulse Delay \*\*\*  
 Comment\_8 = \*\*\* Pulse Field Gradi \*\*\*  
 Comment\_900 = \*\*\* lock hold \*\*\*  
 Dante\_Loop = 699

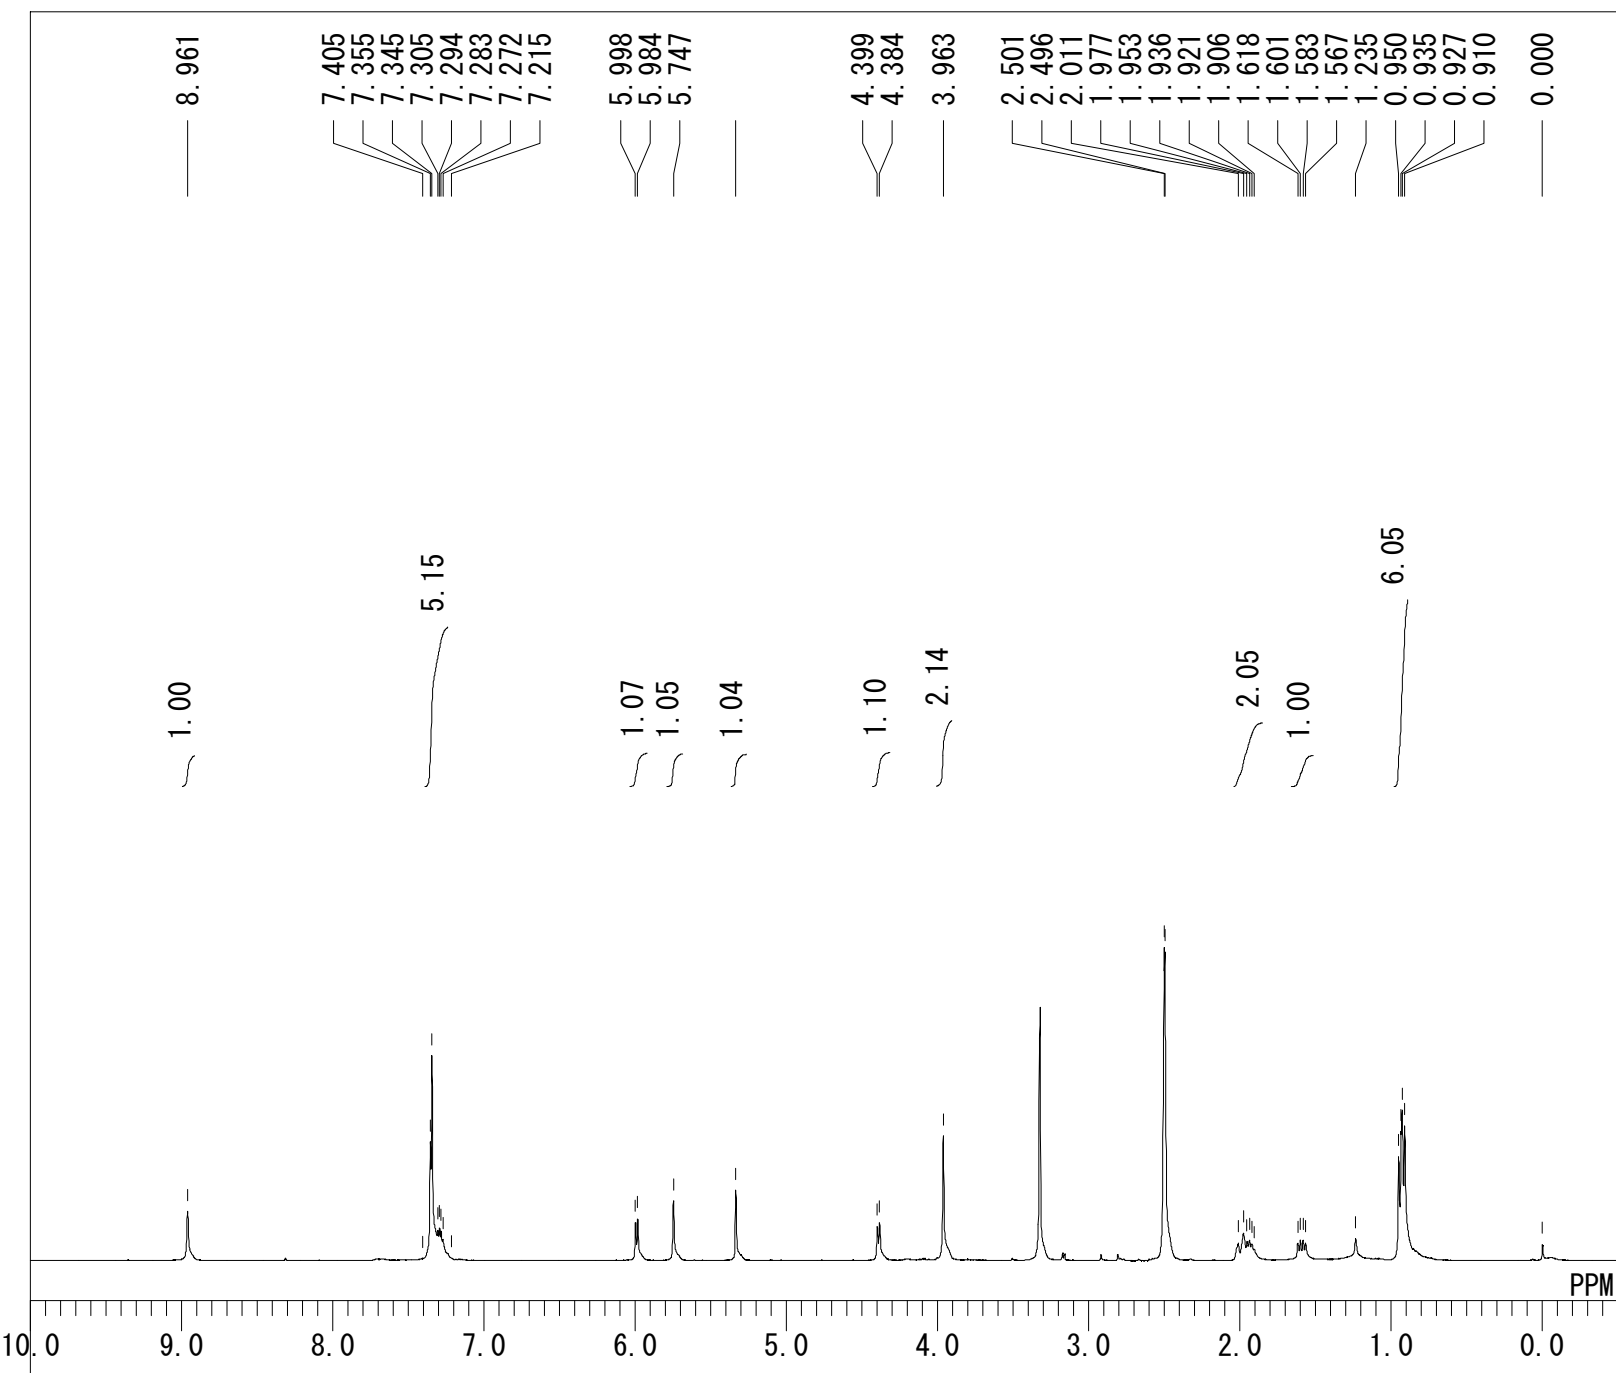

OBFRQ 399.65 MHz  
 OBSET 124.00 KHz  
 OBFIN 10500.00 Hz  
 POINT 16384  
 FREQU 7992.01 Hz  
 SCANS 32  
 ACQTM 2.0500 sec  
 PD 4.9500 sec  
 PW1 5.80 usec  
 IRNUC 1H  
 CTEMP 23.6 c  
 SLVNT DMSO  
 EXREF 0.00 ppm  
 BF 0.12 Hz  
 RGAIN 19

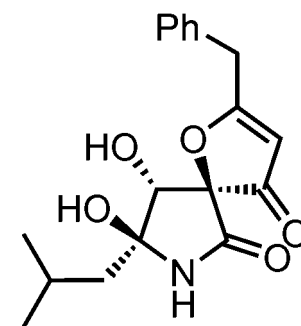

14-*epi*-3

<sup>1</sup>H NMR

DMSO-*d*<sub>6</sub> (400 MHz)



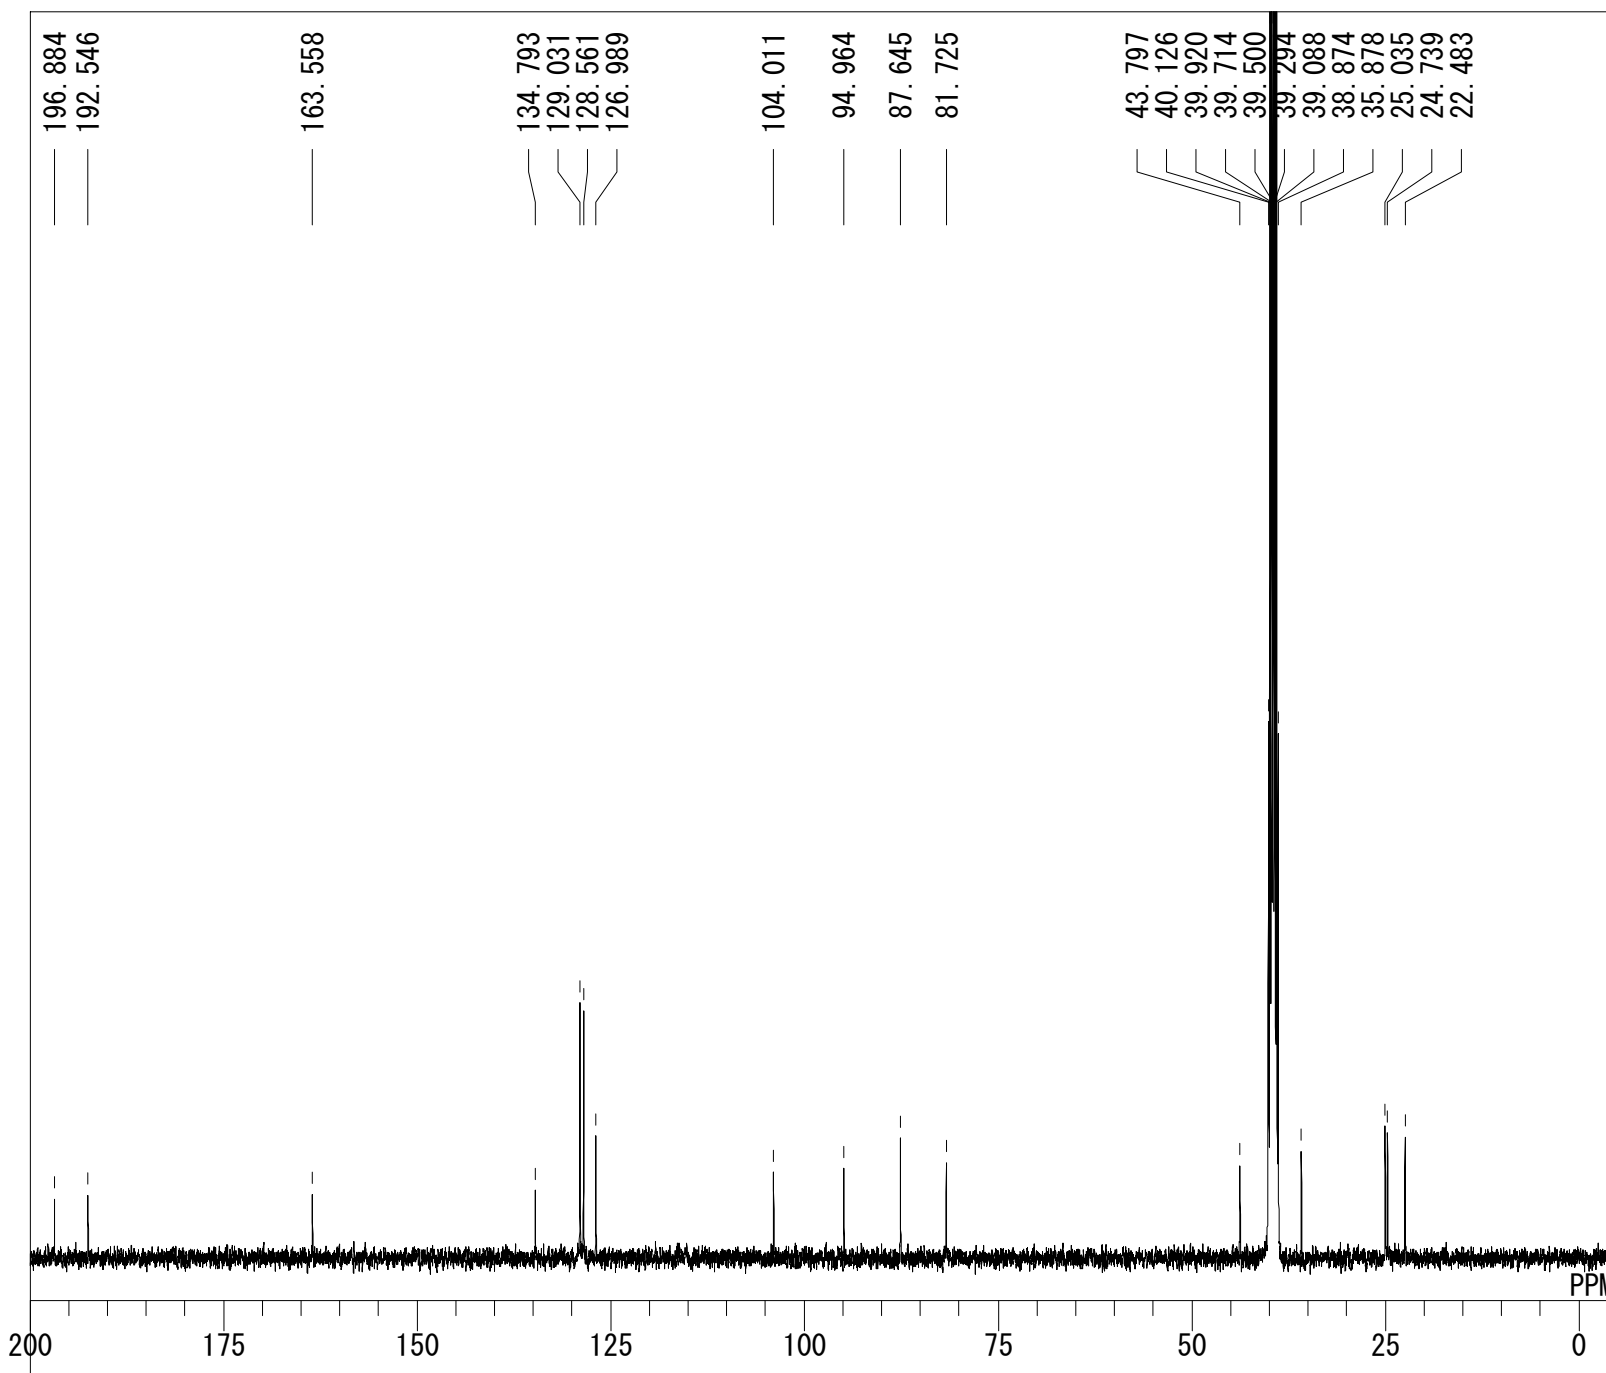

OBFREQ 100.40 MHz  
 OBSET 125.00 KHz  
 OBFIN 10500.00 Hz  
 POINT 32768  
 FREQU 27118.64 Hz  
 SCANS 1500  
 ACQTM 1.2083 sec  
 PD 1.7920 sec  
 PW1 5.80 usec  
 IRNUC 1H  
 CTEMP 24.2 c  
 SLVNT DMSO  
 EXREF 39.50 ppm  
 BF 2.00 Hz  
 RGAIN 25

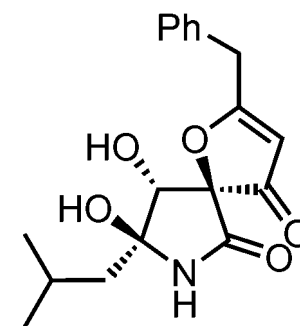

14-*epi*-3  
<sup>13</sup>C NMR  
 DMSO-*d*<sub>6</sub> (100 MHz)

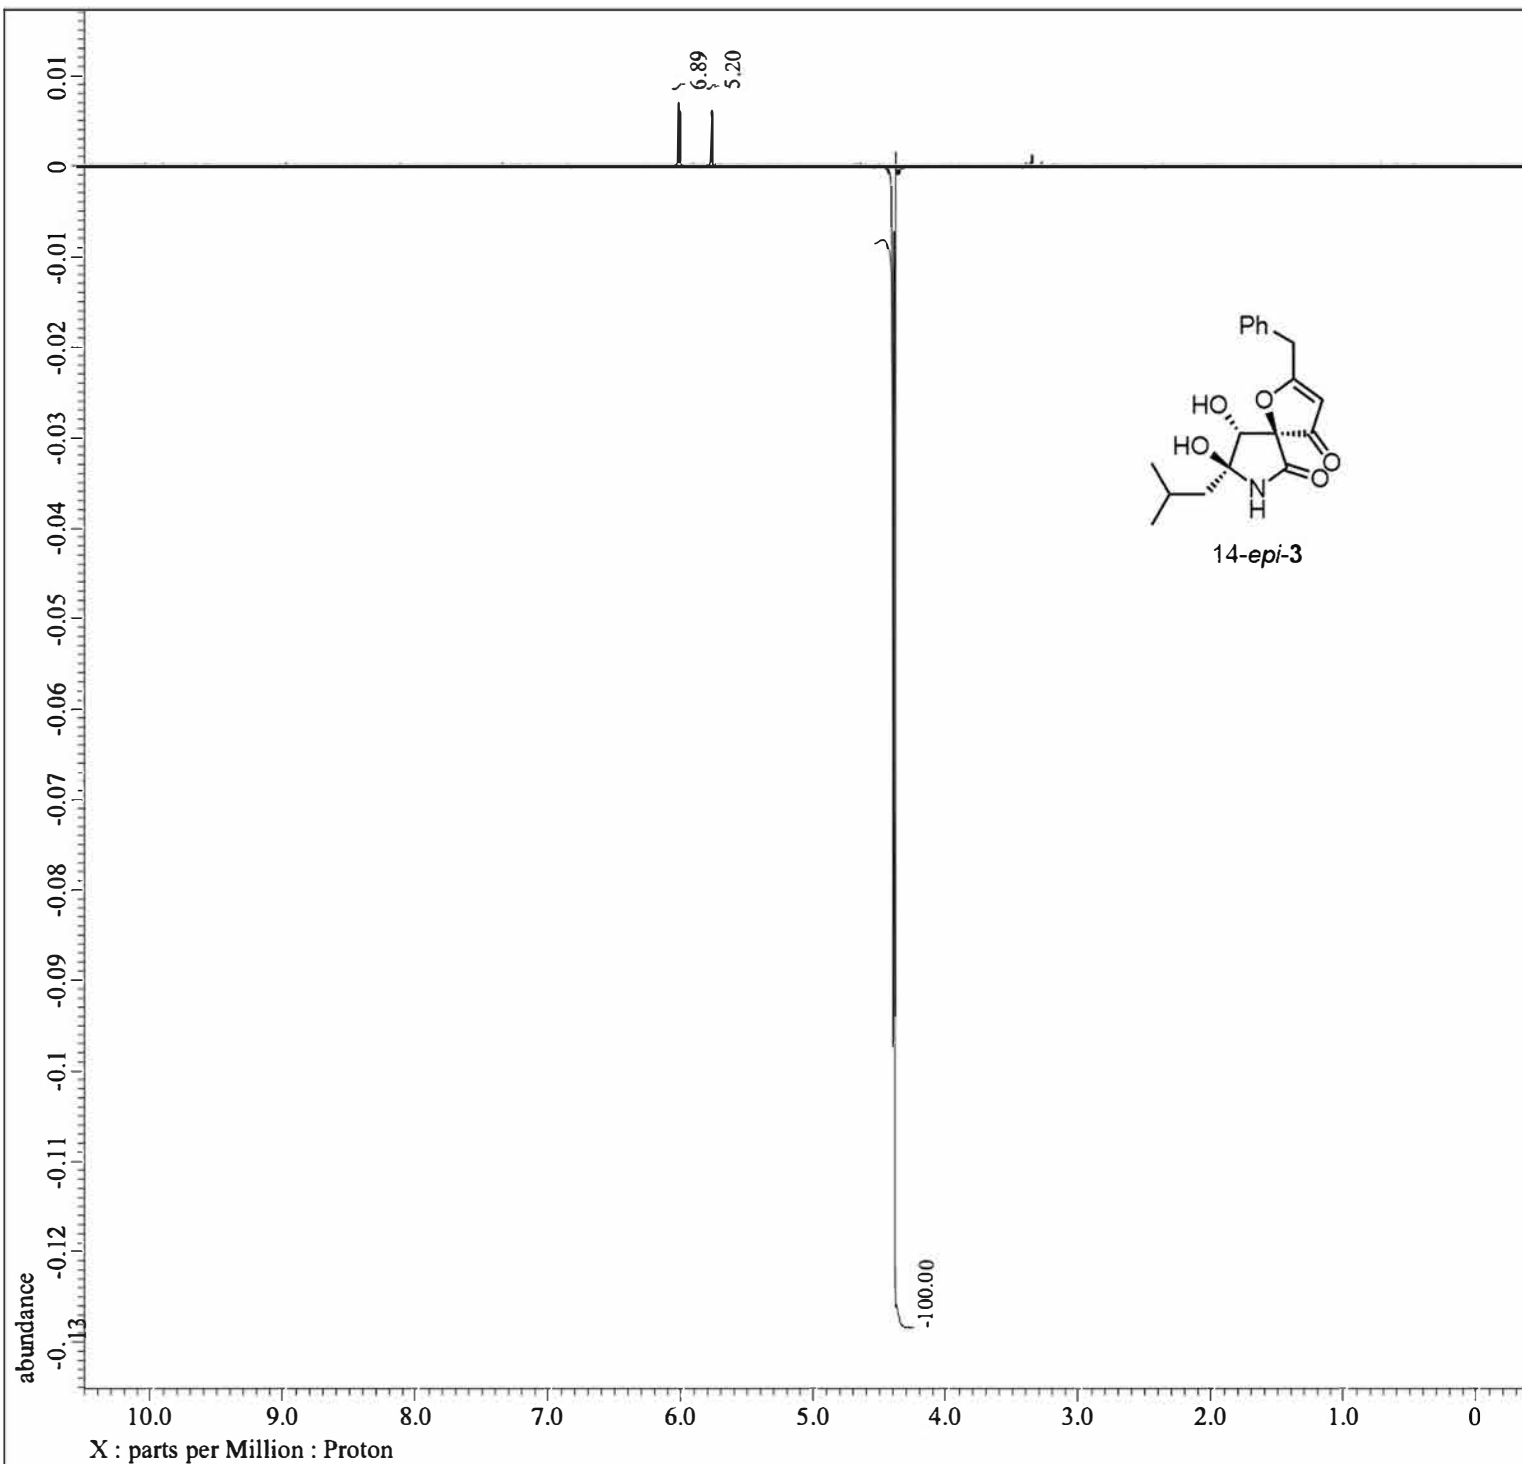

Filename = KST-berkeleyamideD-is  
 Author = delta  
 Experiment = noe\_ld\_dpfge.jxp  
 Sample Id = KST-berkeleyamideD-is  
 Solvent = DMSO-D6  
 Creation Time = 23-AUG-2021 18:13:17  
 Revision Time = 27-AUG-2021 10:27:26  
 Current Time = 27-AUG-2021 10:28:49

Comment = DPFGE NOE 1D  
 Data Format = 1D COMPLEX  
 Dim Size = 13107  
 Dim Title = Proton  
 Dim Units = [ppm]  
 Dimensions = X  
 Spectrometer = JNM-ECZ400S/L1

Field Strength = 9.389766[T] (400 [MHz])  
 X Acq Duration = 2.18628096[s]  
 X Domain = 1H  
 X Freq = 399.78219838 [MHz]  
 X Offset = 5 [ppm]  
 X Points = 16384  
 X Prescans = 2  
 X Resolution = 0.45739775 [Hz]  
 X Sweep = 7.4940048 [kHz]  
 X Sweep Clipped = 5.99520384 [kHz]  
 Irr Domain = Proton  
 Irr Freq = 399.78219838 [MHz]  
 Irr Offset = 5 [ppm]  
 Tri Domain = Proton  
 Tri Freq = 399.78219838 [MHz]  
 Tri Offset = 5 [ppm]  
 Blanking = 2 [us]  
 Clipped = FALSE  
 Decimation Req = r: 834 ( 833), g: 49  
 Scans = 16  
 Total Scans = 16

Relaxation Delay = 7[s]  
 Recvr Gain = 50  
 Temp Get = 21.4 [dC]  
 Mix Time = 0.5 [s]  
 X Acq Time = 2.18628096 [s]  
 X Atn = 2.4 [dB]  
 X Pulse = 6.15 [us]  
 Irr Mode = Off  
 Obs Sel 180 = 40 [ms]  
 Obs Sel Atn = 64.932 [dB]  
 Obs Sel Offset = 4.37970352 [ppm]  
 Obs Sel Shape = GAUSS  
 Obs Sel Slp = 4.37970352 [ppm]  
 Tri Mode = Off  
 Comment 1 = \*\*\* Pulse \*\*\*  
 Comment 11 = \*\*\* NOESY mixing time \*\*\*  
 Comment 111 = \*\*\* presat time \*\*\*  
 Comment 201 = \*\*\* obs\_dante\_presatu \*\*\*  
 Comment 202 = \*\*\* irr\_preaturation \*\*\*  
 Comment 203 = \*\*\* tri\_preaturation \*\*\*  
 Comment 32 = \*\*\* Selective 180deg \*\*\*  
 Comment 7 = \*\*\* Pulse Delay \*\*\*  
 Comment 8 = \*\*\* Pulse Field Gradi \*\*\*  
 Comment 900 = \*\*\* lock hold \*\*\*  
 Dante Loop = 699
